1 **Molecular evolutionary trends and**  
2 **feeding ecology diversification in the Hemiptera,**  
3 **anchored by the milkweed bug genome**  
4  
5

6 Kristen A. Panfilio<sup>1,2\*</sup>, Iris M. Vargas Jentsch<sup>1</sup>, Joshua B. Benoit<sup>3</sup>, Deniz  
7 Erezylmaz<sup>4</sup>, Yuichiro Suzuki<sup>5</sup>, Stefano Colella<sup>6,7</sup>, Hugh M. Robertson<sup>8</sup>, Monica F.  
8 Poelchau<sup>9</sup>, Robert M. Waterhouse<sup>10,11</sup>, Panagiotis Ioannidis<sup>10</sup>, Matthew T.  
9 Weirauch<sup>12</sup>, Daniel S.T. Hughes<sup>13</sup>, Shwetha C. Murali<sup>13,14,15</sup>, John H. Werren<sup>16</sup>, Chris  
10 G.C. Jacobs<sup>17,18</sup>, Elizabeth J. Duncan<sup>19,20</sup>, David Armisen<sup>21</sup>, Barbara M.I. Vreede<sup>22</sup>,  
11 Patrice Baa-Puyoulet<sup>6</sup>, Chloé S. Berger<sup>21</sup>, Chun-che Chang<sup>23</sup>, Hsu Chao<sup>13</sup>, Mei-Ju M.  
12 Chen<sup>9</sup>, Yen-Ta Chen<sup>1</sup>, Christopher P. Childers<sup>9</sup>, Ariel D. Chipman<sup>22</sup>, Andrew G.  
13 Cridge<sup>19</sup>, Antonin J.J. Crumière<sup>21</sup>, Peter K. Dearden<sup>19</sup>, Elise M. Didion<sup>3</sup>, Huyen  
14 Dinh<sup>13</sup>, HarshaVardhan Doddapaneni<sup>13</sup>, Amanda Dolan<sup>16,24</sup>, Shannon Dugan<sup>13</sup>,  
15 Cassandra G. Extavour<sup>25,26</sup>, Gérard Febvay<sup>6</sup>, Markus Friedrich<sup>27</sup>, Neta Ginzburg<sup>22</sup>, Yi  
16 Han<sup>13</sup>, Peter Heger<sup>28</sup>, Thorsten Horn<sup>1</sup>, Yi-min Hsiao<sup>23</sup>, Emily C. Jennings<sup>3</sup>, J. Spencer  
17 Johnston<sup>29</sup>, Tamsin E. Jones<sup>25</sup>, Jeffery W. Jones<sup>27</sup>, Abderrahman Khila<sup>21</sup>, Stefan  
18 Koelzer<sup>1</sup>, Viera Kovacova<sup>30</sup>, Megan Leask<sup>19</sup>, Sandra L. Lee<sup>13</sup>, Chien-Yueh Lee<sup>9</sup>,  
19 Mackenzie R. Lovegrove<sup>19</sup>, Hsiao-ling Lu<sup>23</sup>, Yong Lu<sup>31</sup>, Patricia J. Moore<sup>32</sup>, Monica  
20 C. Munoz-Torres<sup>33</sup>, Donna M. Muzny<sup>13</sup>, Subba R. Palli<sup>34</sup>, Nicolas Parisot<sup>6</sup>, Leslie  
21 Pick<sup>31</sup>, Megan Porter<sup>35</sup>, Jiaxin Qu<sup>13</sup>, Peter N. Refki<sup>21,36</sup>, Rose Richter<sup>16,37</sup>, Rolando  
22 Rivera Pomar<sup>38</sup>, Andrew J. Rosendale<sup>3</sup>, Siegfried Roth<sup>1</sup>, Lena Sachs<sup>1</sup>, M. Emília  
23 Santos<sup>21</sup>, Jan Seibert<sup>1</sup>, Essia Sghaier<sup>21</sup>, Jayendra N. Shukla<sup>34,39</sup>, Richard J.  
24 Stancliffe<sup>40</sup>, Olivia Tidswell<sup>19,41</sup>, Lucila Traverso<sup>42</sup>, Maurijn van der Zee<sup>17</sup>, Séverine  
25 Viala<sup>21</sup>, Kim C. Worley<sup>13</sup>, Evgeny M. Zdobnov<sup>10</sup>, Richard A. Gibbs<sup>13</sup>, Stephen  
26 Richards<sup>13\*</sup>

27

28

29 \* Correspondence: kristen.panfilio@alum.swarthmore.edu; stephenr@bcm.edu

30

31 The full list of author information is available at the end of the manuscript.

32

33

34 **ABSTRACT**

35

36 **Background:**

37 The Hemiptera (aphids, cicadas, and true bugs) are a key insect order whose members  
38 offer a close outgroup to the Holometabola, with high diversity within the order for  
39 feeding ecology and excellent experimental tractability for molecular genetics.

40 Sequenced genomes have recently become available for hemipteran pest species such  
41 as phloem-feeding aphids and blood-feeding bed bugs. To complement and build  
42 upon these resources, we present the genome sequence and comparative analyses  
43 centered on the large milkweed bug, *Oncopeltus fasciatus*, a seed feeder of the family  
44 Lygaeidae.

45 **Results:**

46 The 926-Mb genome of *Oncopeltus* is relatively well represented by the current  
47 assembly and official gene set, which supports *Oncopeltus* as a fairly conservative  
48 hemipteran species for anchoring molecular comparisons. We use our genomic and  
49 RNA-seq data not only to characterize features of the protein-coding gene repertoire  
50 and perform isoform-specific RNAi, but also to elucidate patterns of molecular  
51 evolution and physiology. We find ongoing, lineage-specific expansion and  
52 diversification of repressive C2H2 zinc finger proteins and of intron gain and turnover  
53 in the Hemiptera. These analyses also weigh the relative importance of lineage and  
54 genome size as predictors of gene structure evolution in insects. Furthermore, we  
55 identify enzymatic gains and losses that correlate with hemipteran feeding biology,  
56 particularly for reductions in chemoreceptor family size and loss of metabolic  
57 reactions within species with derived, fluid-nutrition feeding modes.

58 **Conclusions:**

59 With the milkweed bug genome, for the first time we have a critical mass of  
60 sequenced species representing a hemimetabolous insect order, substantially  
61 improving the diversity of insect genomics beyond holometabolans such as flies and  
62 ants. We use this addition to define commonalities among the Hemiptera and then  
63 delve into how hemipteran species' genomes reflect their feeding ecology types. Our  
64 novel and detailed analyses integrate global and rigorous manual approaches,  
65 generating hypotheses and identifying specific sets of genes for future investigation.  
66 Given *Oncopeltus*'s strength as an experimental research model, we take particular  
67 care to evaluate the sequence resources presented here, augmenting its foundation for  
68 molecular research and highlighting potentially general considerations exemplified in  
69 the assembly and annotation of this medium-sized genome.

70

71

72 **Keywords:**

73 Phytophagy; Transcription Factors; Gene Structure; Lateral Gene Transfer; RNAi;  
74 Gene family evolution; Evolution of Development

75

76

## 77 BACKGROUND

78

79 In the past few years, the number of animals with sequenced genomes has increased  
80 dramatically, and there are now over 100 insect species with assembled and annotated  
81 genomes [1]. However, the majority belong to the Holometabola (*e.g.*, flies, beetles,  
82 wasps, butterflies), the group characterized by a biphasic life history with distinct  
83 larval and adult phases separated by a dramatic metamorphosis during a pupal stage.  
84 With fewer than half of all orders, the Holometabola represent only a fraction of the  
85 full morphological and ecological diversity across the Insecta. This imbalance in  
86 genomic resources limits the exploration of this diversity, including the environmental  
87 and developmental requirements of a hemimetabolous life style with a progression of  
88 flightless nymphal (juvenile) instars. Addressing this paucity, we report here  
89 comparative analyses based on genome sequencing of the large milkweed bug,  
90 *Oncopeltus fasciatus*, as a hemimetabolous representative of the larger diversity of  
91 insects.

92

93 The Hemiptera, the order to which *Oncopeltus* belongs, comprise the most  
94 species-rich hemimetabolous order and a close outgroup to the Holometabola as part  
95 of the hemipteroid assemblage (or Acercaria), with the Thysanoptera as a sister order  
96 and the Psocodea also traditionally included in this clade [2, 3]. All Hemiptera share  
97 the same piercing and sucking mouthpart anatomy [4], yet they have diversified to  
98 exploit food sources ranging from seeds and plant tissues (phytophagy) to phloem sap  
99 (mucivory) and mammalian blood (hematophagy). For this reason, many hemipterans  
100 are agricultural pests or human disease vectors, and genome sequencing efforts to date  
101 have focused on these species (Fig. 1), including phloem-feeding aphids [5-7],  
102 psyllids [8], and planthoppers [9], and the hematophagous kissing bug, *Rhodnius*  
103 *prolixus* [10], a vector of Chagas disease, and bed bug, *Cimex lectularius* [11, 12].  
104 Building on transcriptomic data, genome projects are also in progress for other pest  
105 species within the same infraorder as *Oncopeltus*, such as the stink bug *Halyomorpha*  
106 *halys* [13, 14].

107

108 In this context, *Oncopeltus* represents a relatively benign species with  
109 conservative life history traits, affording a baseline against which other species can be  
110 compared. As a seed feeder, *Oncopeltus* has not undergone the marked life style  
111 changes that are associated with fluid feeding (mucivory or hematophagy), including  
112 dependence on endosymbiotic bacteria to provide needed complements lacking in the  
113 diet. For example, in the pea aphid, *Acyrtosiphon pisum*, its obligate endosymbiont,  
114 *Buchnera aphidicola*, provides essential amino acids and vitamins: previous analysis  
115 of the two genomes revealed a complementation of the two organisms' amino acid  
116 metabolism systems [5, 15]. Similarly, although hematophagy arose independently in  
117 *Rhodnius* and *Cimex* [16], their respective endosymbionts, *Rhodococcus rhodnii* and  
118 *Wolbachia*, provide vitamins lacking in the blood diet [17]. In contrast, the seed-  
119 feeding subfamily Lygaeinae, including *Oncopeltus*, is notable for the absence of  
120 prominent endosymbiotic anatomy: these bugs lack not only the midgut crypts that  
121 typically house bacteria but also the bacteriomes and endosymbiotic balls seen even  
122 in other Lygaeidae [18].

123

124 Nonetheless, as the native food source of *Oncopeltus* is the milkweed plant, its  
125 own feeding biology has a number of interesting implications associated with  
126 detoxification and sequestration of cardenolide compounds, including the bright red-

127 orange aposematic (warning) coloration seen in *Oncopeltus* embryos, nymphs, and  
128 adults [19, 20]. Thus, diet, metabolism, and body pigmentation are functionally  
129 linked biological features for which one may expect changes in gene repertoires to  
130 reflect diversity across species of the same order, and the Hemiptera provide an  
131 excellent opportunity to explore this.

132

133 Furthermore, *Oncopeltus* has been an established laboratory model organism  
134 for over 60 years, with a rich experimental tradition in a wide range of studies from  
135 physiology and development to evolutionary ecology [20-22]. It is among the few  
136 experimentally tractable hemimetabolous insect species, and it is amenable to a range  
137 of molecular techniques (*e.g.*, [23-25]). In fact, it was one of the first insect species to  
138 be functionally investigated by RNA interference (RNAi, [26]). RNAi in *Oncopeltus*  
139 is highly effective across different life history stages, which has led to a resurgence of  
140 experimental work over the past fifteen years, with a particular focus on the evolution  
141 of developmentally important regulatory genes (reviewed in [22]).

142

143 Focusing on these two avenues – feeding biology diversity within the  
144 Hemiptera and *Oncopeltus* as a research model for macroevolutionary genetics – we  
145 present here key insights derived from a combination of global comparative genomics  
146 and detailed computational analyses supported by extensive manual curation,  
147 empirical data for gene expression, sequence validation, and new isoform-specific  
148 RNAi. Namely, we identify sets of genes with potentially restricted life history  
149 expression in *Oncopeltus* and that are unique to the Hemiptera, clarify evolutionary  
150 patterns of zinc finger protein expansion, identify predictors of insect gene structure,  
151 and identify lateral gene transfer and amino acid metabolism features that correlate  
152 with feeding biology.

153

154

## 155 RESULTS AND DISCUSSION

156

### 157 The genome and its assembly

158 *Oncopeltus fasciatus* has a diploid chromosome number ( $2n$ ) of 16, comprised of  
159 seven autosomal pairs and two sex chromosomes with the XX/XY sex determination  
160 system [27, 28]. To analyze this genetic resource, we sequenced and assembled the  
161 genome using next-generation sequencing approaches (Table 1; see also Methods and  
162 Supplemental Notes Sections 1-4). We measure the genome size to be 923 Mb in  
163 females and 928 Mb in males based on flow cytometry data (see also Supplemental  
164 Note 2.1.a), such that the assembly contains 84% of the expected sequence in  
165 assembled contigs, which is comparable to that of other recent, medium-sized insect  
166 genomes [11, 29]. However, our analyses of the  $k$ -mer frequency distribution in raw  
167 sequencing reads yielded ambiguous estimates of genome size and heterozygosity  
168 rate, which is suggestive of both high heterozygosity and high repetitive content ([30],  
169 see also Supplemental Note 2.1.b). Consistent with this, in further analyses we  
170 obtained high estimates of repetitive content (see below), which would imply a large  
171 proportion of potentially redundant sequence and possible misassembly within contigs  
172 of the current assembly. This phenomenon may be increasingly relevant as  
173 comparative genomics based on short read sequencing extends to additional insect  
174 species with genomes in the 1-Gb range.

175

176 As template DNA was prepared from dissected adults from which gut material  
177 was removed, the resulting assembly is essentially free of contamination, with only  
178 five small scaffolds with high bacterial homology (each to a different, partial bacterial  
179 genome, see also Supplemental Note 2.2), which either represent trace bacterial  
180 contamination or lateral gene transfers that have not assembled to flanking eukaryotic  
181 DNA, making their confirmation in the current assembly difficult.

182

183

184

185 **Table 1. *Oncopeltus fasciatus* genome metrics.**

186

---

| Feature                        | Value                                                                               |
|--------------------------------|-------------------------------------------------------------------------------------|
| $2n$ chromosomes               | 16                                                                                  |
| Genome size                    | 926 Mb (mean between males and females)                                             |
| Assembly size                  | 1,099 Mb (contigs only: 774 Mb)                                                     |
| Coverage                       | 106.9× raw coverage,<br>83.7% of reads in final assembly                            |
| Contig N50                     | 4,047 bp                                                                            |
| Scaffold N50                   | 340.0 kb                                                                            |
| # Scaffolds                    | 17,222                                                                              |
| GC content                     | genome: 32.7%,<br>protein-coding sequence (OGS v1.2): 42%                           |
| OGS v1.1<br>(curated fraction) | 19,690 models <sup>1</sup> 19,465 genes<br>(1,426 models, 7.2%) (1,201 genes, 6.2%) |
| OGS v1.2<br>(curated fraction) | 19,809 models <sup>1</sup> 19,616 genes<br>(1,697 models, 8.7%) (1,518 genes, 7.7%) |

187

188 <sup>1</sup> Individual genes may be represented by multiple models in cases of curated  
189 alternative isoforms or if the gene is split across scaffolds.

190

191

192

### 193 **The official gene set and conserved gene linkage**

194 The official gene set (OGS) was generated by automatic annotation followed by  
195 manual curation in a large-scale effort by the research community (see also  
196 Supplemental Notes Sections 3-4). Curation revised automatic annotation models,  
197 added alternative isoforms and *de novo* models, and documented multiple discrete  
198 models for genes whose exons were split across scaffolds. We found that automatic  
199 predictions were somewhat conservative for hemipteran gene structure (see below),  
200 and manual curation primarily resulted in larger gene loci as exons were added and/or  
201 extended, including merging discrete automatic models (see also Supplemental Note  
202 4, Table S4.4). The OGS v1.1 was generated for global, pipeline analyses to  
203 characterize the gene repertoire. The latest version, OGS v1.2, represents a minor  
204 update, primarily for the addition of chemoreceptor genes of the ionotropic and  
205 odorant receptor classes and curation of genes encoding metabolic enzymes.  
206 Altogether, the research community curated 1,697 gene models (8.7% of OGS v1.2),  
207 including 316 *de novo* models (see also Table S4.1). Reflecting the primary research  
208 interests of the community (see also Supplemental Notes Section 5), the majority of  
209 curated models are for genes encoding cuticular proteins (11%), chemoreceptors  
210 (19%), and developmental regulators such as transcription factors and signaling  
211 pathway components (40%, including the BMP/TGF- $\beta$ , Toll/NF- $\kappa$ B, Notch,  
212 Hedgehog, Torso RTK, and Wnt pathways).

213

214 In addition to assessing gene model quality, manual curation of genes whose  
215 orthologs are expected to occur in syntenic clusters also validates assembly  
216 scaffolding. Complete loci could be found for single orthologues of all Hox cluster  
217 genes, where *Hox3/zen* and *Hox4/Dfd* are linked in the current assembly and have  
218  $\geq 99.9\%$  nucleotide identity with experimentally validated sequences ([31-33],  
219 Supplemental Note 5.1.b). Conserved linkage was also confirmed for the homeobox  
220 genes of the Iroquois complex, the Wnt ligands *wingless* and *wnt10*, and two linked  
221 pairs from the Runt transcription factor complex (Supplemental Notes 5.1.a, 5.1.c,  
222 5.1.i, 5.1.j). Further evidence for correct scaffold assembly comes from the curation  
223 of large, multi-exonic loci. For example, the cell polarity and cytoskeletal regulator  
224 encoded by the conserved *furry* gene includes 47 exons spanning a 437-kb locus,  
225 which were all correctly assembled on a single scaffold.

226

227

### 228 **Transcriptomic resources and gene expression profiles across the milkweed bug** 229 **life cycle**

230 To augment published transcriptomic resources [34, 35], we sequenced three different  
231 post-embryonic samples (“i5K” dataset, see Methods). We then compared the OGS  
232 to the resulting *de novo* transcriptome and to a previously published embryonic and  
233 maternal (ovary) transcriptome (“454” pyrosequencing dataset, [34]). Our OGS is  
234 quite comprehensive, containing 90% of transcripts from each transcriptomic dataset  
235 and an additional 3,146 models (16% of OGS: Fig. 2a). Among the additional  
236 models, 274 (9%) were manually validated, including 163 *de novo* models for odorant  
237 and gustatory receptors. These gene classes are known for lineage-specific  
238 expansions and highly tissue- and stage-specific expression, with usually only one  
239 receptor expressed per sensory neuron ([36, 37], and see below).

240

241 Furthermore, the OGS does a good job of “mopping up” partial and  
242 unidentified 454 transcripts. We could substantially improve orthologous gene  
243 discovery by mapping the 454 transcripts to the OGS (blastn,  $e < 10^{-9}$ ), nearly trebling  
244 the proportion of transcripts with an assigned gene model or homology compared to  
245 the original study (from 9% to 26%). This included 10,130 transcripts that primarily  
246 mapped to UTRs and could not have been identified by coding sequence homology,  
247 such as the 654-bp transcript for the *Oncopeltus brinker* ortholog, which encodes a  
248 putative inhibitor of the BMP pathway ([38], see also Supplemental Note 5.1.f), and  
249 four unassembled transcripts each from the 3' UTRs of the enzyme-encoding genes  
250 *CTP synthase* and *roquin*. At the same time, the transcriptomes provided expression  
251 support for the identification of multiple isoforms in the OGS. For example, we could  
252 confirm previously described isoforms for the germline determinant encoded by  
253 *nanos* [34]. Where assembly limitations curtailed OGS gene models, full-length  
254 transcripts are represented in the transcriptomes, such as for the ecdysis regulator  
255 CCAP-R [39] and the chromatin linker Histone H1.

256  
257 We then took advantage of our stage-specific RNA datasets to provide an  
258 initial survey of gene expression profiles across biological samples and across the life  
259 cycle. Most OGS gene models have expression support (91% of 19,690), with 74%  
260 expressed broadly in at least three of four samples (Fig. 2b). The inclusion of a fifth  
261 dataset from a published adult library [35] provided only a 1% gain in expression  
262 support (218 gene models), indicating that with the current study the expression data  
263 volume for *Oncopeltus* is quite complete. At the same time, direct comparison of the  
264 three adult samples suggests that the published adult dataset of unspecified sex is  
265 probably male, as it shares 4.6× more expressed genes with our male than our female  
266 sample.

267  
268 As these data derive from limited biological sampling, we remain cautious  
269 about true stage specificity and do not quantify expression levels. We do, however,  
270 note that most genes with stage-restricted expression are in sets involving our male  
271 sample (Fig. 2b: male-only or male and nymph), although this sample does not  
272 contain more reads or more expressed genes. Furthermore, we also find stage-  
273 specific patterns for some of our most abundant curated gene classes. Gustatory  
274 receptor (GR) genes show noticeable restriction to the adult male and published adult  
275 (probable male) samples (n= 169 GRs: 40% no expression, 27% only expressed in  
276 these two samples), with half of these expressed in both biological replicates (52%).  
277 Interestingly, the nymphal sample is enriched for genes encoding structural cuticular  
278 proteins (94%, which is >56% more than any other sample). This likely reflects the  
279 ongoing molting cycles, with their cyclical upregulation of cuticular gene synthesis  
280 [40], that are experienced by the different instars and molt cycle stages of individuals  
281 pooled in this sample.

282  
283

#### 284 **Protein orthology and hemipteran copy number comparisons**

285 To further assay protein-coding gene content, we then compared *Oncopeltus* with  
286 eleven other arthropod species. A phylogeny based on single copy orthologs correctly  
287 reconstructs the hemipteran and holometabolan clades' topologies (Fig. 3a, compare  
288 with Fig. 1a), although larger-scale insect relationships remain challenging [3]. In  
289 expanding this to the Benchmarking Universal Single-Copy Orthologs (BUSCO,  
290 [41]) dataset of 2,675 Arthropoda genes, we also found that most BUSCO genes are

291 present in the *Oncopeltus* OGS, although with additional genes identified on genomic  
292 scaffolds but not yet incorporated into the gene set (see also Supplemental Note 6.1).  
293 We next categorized all proteins by conservation in global, clustering-based orthology  
294 analyses [42]. As in most species, half of *Oncopeltus* proteins (51%) falls within the  
295 top three conservation levels (Fig. 3a). Moreover, 98% of all *Oncopeltus* protein-  
296 coding genes has homology, expression, and/or curation support (Fig. 3b), including  
297 support for 80% of proteins without homology, such as a few species-specific  
298 chemoreceptors and antimicrobial peptides (see also Supplemental Note 5.1.h), while  
299 some unsupported models may be split or partial. Overall, we estimate that the  
300 *Oncopeltus* protein repertoire is comparable to that of other insects in size and degree  
301 of conservation.  
302

303 In contrast, the pea aphid, *Acyrtosiphon pisum*, is a notable outlier even  
304 among fellow Hemiptera, where we provide a side-by-side comparison with  
305 *Oncopeltus* as well as the recently-sequenced kissing bug, *Rhodnius prolixus* [10],  
306 and bed bug, *Cimex lectularius* [11, 12]. The pea aphid is striking for its long branch  
307 in phylogenetic comparisons and for its large protein-coding gene content with low  
308 conservation (Fig. 3a), consistent with the observation of numerous lineage-specific  
309 duplications [5]. As the first hemipteran to have its genome sequenced, the pea aphid  
310 has often been used to boost taxonomic sampling in phylogenomic comparisons (*e.g.*,  
311 [29]). However, the pea aphid may not be the best representative, and as more  
312 hemipteran genomes are sequenced, other species now offer less derived alternatives.  
313

314  
315 Compared to the pea aphid [43], *Oncopeltus* is more conservative in both  
316 presence and copy number for several signaling pathway components. In contrast to  
317 gene absences described for the pea aphid, *Oncopeltus* retains orthologs of the EGF  
318 pathway component *sprouty*, the BMP receptor *wishful thinking*, and the hormone  
319 nuclear receptor *Hr96* (see also Supplemental Note 5.1.e). Similarly, whereas  
320 multiple copies were reported for the pea aphid, we find a single *Oncopeltus* ortholog  
321 for the BMP pathway components *decapentaplegic* and *Medea* and the Wnt pathway  
322 intracellular regulator encoded by *shaggy/GSK-3*, albeit with five potential isoforms  
323 of the latter (see also Supplemental Notes 5.1.f, 5.1.j). Duplications of miRNA and  
324 piRNA gene silencing components likewise seem to be restricted to the pea aphid  
325 compared to other hemipterans – including other aphid species ([44], see also  
326 Supplemental Note 5.4.a). However, our survey of *Oncopeltus* and several other  
327 hemimetabolous species reveals evidence for frequent parallel duplications of the Wnt  
328 pathway component *armadillo/β-catenin*, yet without the sequence and functional  
329 divergence previously observed independently in the pea aphid and *Tribolium* ([45],  
330 see also Supplemental Note 5.1.j). Curiously, *Oncopeltus* appears to encode fewer  
331 histone loci than any other arthropod genome and yet exhibits a similar, but possibly  
332 independent, pattern of duplications of histone acetyltransferases to those previously  
333 identified in *Cimex* and the pea aphid (see also Supplemental Note 5.4.c).  
334

335 On the other hand, we documented several notable *Oncopeltus*-specific  
336 duplications. Whereas two copies of the BMP transducer *Mad* were reported in the  
337 pea aphid [43], we find evidence for three paralogs in *Oncopeltus*, where two of these  
338 genes occur in tandem and may reflect a particularly recent duplication (see also  
339 Supplemental Note 5.1.f). Similarly, a tandem duplication of *wnt8* appears to be  
340 unique to *Oncopeltus* (see also Supplemental Note 5.1.j). More striking is the



341 identification of six potential paralogs of *cactus*, a member of the Toll/NF- $\kappa$ B  
342 signaling pathway for innate immunity, whereas the bed bug and kissing bug  
343 each retain only a single copy ([46], see also Supplemental Note 5.1.g).

344

345 We then took advantage of broader comparative datasets [42] to identify  
346 lineage-specific features of the Hemiptera. In other words, what makes a bug a bug in  
347 terms of protein-coding genes? To address this, we partitioned an orthology analysis  
348 of 64 insect species into three broad taxonomic groups (Fig. 3c). Highlights for the  
349 Hemiptera, which are further corroborated in an updated dataset with 116 insect  
350 species (OrthoDB v.9.1, [1]), fall into two classes. The first class contains potentially  
351 new genes that show no homology outside the Hemiptera. We identified three such  
352 instances with orthologous protein members present in at least four hemipterans, and  
353 where no conserved functional domains were recognized. Interpretation of these  
354 intriguing “uncharacterized proteins” will have to await direct experimental analyses,  
355 for which the Hemiptera in general are particularly amenable (*e.g.*, [47-50]). The  
356 second class comprises proteins with recognized functional domains and homologs in  
357 other insects, but where evolutionary divergence has led to hemipteran-specific  
358 subfamilies. For example, one protein orthology group (“orthogroup”  
359 EOG090W0V4B) is comprised of a heteropteran-specific cytochrome P450 (CYP)  
360 enzyme that in *Oncopeltus* is expressed in all life history stages. The expansion of  
361 this protein family is associated with a species’ potential scope for insecticide  
362 resistance, as specific P450s can confer resistance to specific chemicals (*e.g.*, [51, 52];  
363 see also Supplemental Notes 5.3.b, 5.3.c). Hence, the identification of lineage-  
364 specific CYP enzymes can suggest potential targets for integrated pest management  
365 approaches.

366

367

### 368 **Transcription factor repertoires and homeobox gene evolution**

369 Having explored the global protein repertoire, we next focused specifically on  
370 transcription factors (TFs), which comprise a major class of proteins that has been  
371 extensively studied in *Oncopeltus*. This is a class of key regulators of development  
372 whose functions can diverge substantially during evolution and for which RNAi-  
373 based experimental investigations have been particularly fruitful in the milkweed bug  
374 (*e.g.*, [31, 32, 53-55], see also Supplemental Notes 5.1.a-e).

375

376 To systematically evaluate the *Oncopeltus* TF repertoire, we used a pipeline to  
377 scan all predicted proteins and assign them to TF families, including orthology  
378 assignments in cases where DNA binding motifs could be predicted (see Methods,  
379 [56]). We identified 762 putative TFs in *Oncopeltus*, which is similar to other insects  
380 of diverse orders for total TF count and for the size of each TF family (Fig. 4a: note  
381 that the heatmap also reflects the large, duplicated repertoire in the pea aphid; see also  
382 Tables S6.2-6.4).

383

384 We were able to infer DNA binding motifs for 25% (n=189) of *Oncopeltus*  
385 TFs, mostly based on data from *D. melanogaster* (121 TFs) but also from distantly  
386 related taxa such as mammals (56 TFs). Such high conservation is further reflected in  
387 the fact that most proteins within several large TF families have inferred motifs and  
388 therefore explicit orthology assignments, including for the homeodomain (53 of 85,  
389 62%), basic helix-loop-helix (bHLH, 35 of 45, 78%), and forkhead box (16 of 17,  
390 94%) families. In contrast, most C2H2 zinc finger proteins lack orthology assignment

391 (only 22 of 360, 6%). Across species, the homeodomain and C2H2 zinc finger  
392 proteins are the two largest TF superfamilies (Fig. 4a). Given their very different  
393 rates of orthology assignment in *Oncopeltus*, we probed further into the pipeline  
394 predictions and the patterns of evolutionary diversification of these proteins.

395  
396 The number of homeodomain proteins identified by the pipeline displays a  
397 narrow normal distribution across species (Fig. 4b, mean  $\pm$  standard deviation:  $97 \pm$   
398 9), consistent with a highly conserved, slowly evolving protein family. Supporting  
399 this, many *Oncopeltus* homeodomain proteins that were manually curated also  
400 received a clear orthology assignment (Fig. 4c: pink), with only four exceptions (Fig.  
401 4c: yellow). Only one case suggests a limitation of a pipeline that is not specifically  
402 tuned to hemipteran proteins (Gooseoid), while an incomplete gene model received  
403 homeodomain classification but without explicit orthology assignment (Distal-less).  
404 Manual curation of other partial or split models identified a further 11 genes encoding  
405 homeodomains, bringing the actual tally in *Oncopeltus* to 96, which is comparable to  
406 the mean across species. Overall, we find the TF pipeline results to be a robust and  
407 reasonably comprehensive representation of these gene classes in *Oncopeltus*.

408  
409 These analyses also uncovered a correction to the published *Oncopeltus*  
410 literature for the key developmental patterning proteins encoded by the closely related  
411 paralogs *engrailed* and *invected*. These genes arose from an ancient tandem  
412 duplication prior to the hexapod radiation, where their tail-to-tail orientation enables  
413 ongoing gene conversion [57], making orthology discrimination particularly  
414 challenging. For *Oncopeltus*, we find that the genes also occur in a tail-to-tail  
415 orientation and that *invected* retains a diagnostic alternative exon [57]. These new  
416 genomic and expression data reveal that the *Oncopeltus* gene used as the purported  
417 *engrailed* ortholog in previous developmental studies (*e.g.*, [53, 58-61]) is in fact  
418 *invected* (see also Supplemental Note 5.1.a).

419  
420

#### 421 **Independent expansions of C2H2 zinc fingers within the Hemiptera**

422 Unlike homeodomain proteins, C2H2 zinc finger (C2H2-ZF) repertoires are  
423 prominent for their large family size and variability throughout the animal kingdom  
424 [62], and this is further supported by our current analysis in insects. With >350  
425 C2H2-ZFs, *Oncopeltus*, the pea aphid, the termite, and several mosquito species have  
426 1.5 $\times$  more members than the insect median (Fig. 4b). This is nearly half of all  
427 *Oncopeltus* TFs. While the expansion in mosquitoes could have a single origin after  
428 the Culicinae diverged from the Anophelinae, the distribution in the Hemiptera, where  
429 *Cimex* has only 227 C2H2-ZFs, suggests that independent expansions occurred in  
430 *Oncopeltus* and the pea aphid. Prior to the sequencing of other hemipteran genomes,  
431 the pea aphid's large C2H2-ZF repertoire was attributed to the expansion of a novel  
432 subfamily, APEZ, also referred to as zinc finger 271-like [43].

433

434 In fact, manual curation in *Oncopeltus* confirms the presence of a subfamily  
435 with similar characteristics to APEZ (Fig. 4c: 42% of all C2H2-ZFs were curated,  
436 including 38% of those without orthology assignment, yellow). Specifically, in  
437 *Oncopeltus* we find >115 proteins of the ZF271 class that are characterized by  
438 numerous tandem repeats of the C2H2-ZF domain and its penta-peptide linker, with  
439 3-45 repeats per protein.

440

441           However, at both the gene and protein levels we find evidence for ongoing  
442 evolutionary diversification of the *Oncopeltus* ZF271-like subfamily. A number of  
443 *Oncopeltus* ZF271-like genes occur in tandem clusters of 4-8 genes, suggesting recent  
444 duplication events. Yet, at the same time, gene structure (number and size of exons)  
445 is not shared between genes within clusters, and we identified a number of probable  
446 ZF271-like pseudogenes whose open reading frames have become disrupted –  
447 consistent with high turnover. At the domain level, *Oncopeltus* ZF271-like proteins  
448 differ in the sequence and length of the zinc finger domains amongst themselves and  
449 compared to aphid proteins (WebLogo analysis [63]), similar to zinc finger array  
450 shuffling seen in humans [64]. Furthermore, whole-protein phylogenetic analysis  
451 supports independent, rapid expansions in the pea aphid and *Oncopeltus* (Fig. 4d).

452  
453           Clustered zinc finger gene expansion has long been recognized in mammals,  
454 with evidence for strong positive selection to increase both the number and diversity  
455 of zinc finger domains per protein as well as the total number of proteins [65]. This  
456 was initially found to reflect an arms-race dynamic of co-evolution between selfish  
457 transposable elements and the C2H2-ZF proteins that would repress them [66]. In  
458 vertebrates, these C2H2-ZF proteins bind to the promoters of transposable elements  
459 via their zinc finger arrays and use their Krüppel-associated box (KRAB) domain to  
460 bind the chromatin-remodeling co-repressor KAP-1, which in turn recruits  
461 methyltransferases and deacetylases that silence the targeted promoter [67].

462  
463           Insects do not have a direct ortholog of vertebrate KAP-1 (see also  
464 Supplemental Note 5.4.d), and neither the aphid nor *Oncopeltus* ZF271-like  
465 subfamilies possess a KRAB domain or any other domain besides the zinc finger  
466 arrays. However, close molecular outgroups to this ZF271-like subfamily include the  
467 developmental repressor Krüppel [68] and the insulator protein CTCF [69] (data not  
468 shown). Like these outgroups, the *Oncopeltus* ZF271-like genes are strongly  
469 expressed: 98% have expression support, with 86% expressed in at least three  
470 different life history stages (Fig. 2b). Thus, the insect ZF271-like proteins may also  
471 play prominent roles in repressive DNA binding. Indeed, we find evidence for a  
472 functional methylation system in *Oncopeltus* (see also Supplemental Note 5.4.c), like  
473 the pea aphid, which would provide a means of gene silencing by chromatin  
474 remodeling, albeit via mediators other than KAP-1.

475  
476           However, an arms race model need not be the selective pressure that favors  
477 insect ZF271-like family expansions. Recent analyses in vertebrates identified  
478 sophisticated, additional regulatory potential by C2H2-ZF proteins, building upon  
479 original transposable element binding for new, lineage-specific and even positive  
480 gene regulation roles [64, 70, 71]. Moreover, although *Cimex* has half as many long  
481 terminal repeat (LTR) repetitive elements as *Oncopeltus* and the pea aphid, they  
482 constitute only a minor fraction of these species' transposable elements, and overall  
483 we do not find a correlation between relative or absolute repetitive content and  
484 ZF271-like family expansion within the Hemiptera (Fig. 5, and see below).

485  
486  
487 **Proportional repeat content across hemipterans**

488 With the aim of reducing assembly fragmentation and to obtain a better picture of  
489 repeat content, we performed low coverage, long read PacBio sequencing in  
490 *Oncopeltus* (see also Supplemental Note 2.3). Using PacBio reads in a gap-filling

491 assay on the Illumina assembly raised the total detected repetitive content from 25%  
492 to 32%, while repeat estimations based on simultaneous assessment of Illumina and  
493 PacBio reads nearly doubled this value to 58%. As expected, the capacity to identify  
494 repeats is strongly dependent on assembly quality and sequencing technology, with  
495 the *Oncopeltus* repetitive content underrepresented in the current (Illumina-only)  
496 assembly. Furthermore, as increasing genome size compounds the challenge of  
497 assembling repeats, the repeat content of the current assembly is lower than in species  
498 with smaller genome sizes (Fig. 5a, with the sole exception of the honey bee), and we  
499 therefore used our gap-filled dataset for further repeat profile comparisons.

500  
501 To allow for direct comparisons among hemipterans, we also performed our  
502 RepeatModeler analysis on the bed bug and pea aphid assemblies. In these analyses,  
503 36% and 31% of the respective assemblies were covered by repeats, similar to the  
504 gap-filled value of 32% in *Oncopeltus*. Nevertheless, given the smaller sizes of these  
505 species' assemblies – 651 Mb in the bed bug and 542 Mb in the pea aphid – the  
506 absolute repeat content is much higher in *Oncopeltus* (Fig. 5b). Excluding unknown  
507 repeats, the most abundant transposable elements in *Oncopeltus* are LINE  
508 retrotransposons, covering 10% of the assembly (see also Table S2.5). This is also  
509 the case in the bed bug (12%), while in the pea aphid DNA transposons with terminal  
510 inverted repeats (TIRs) are the most abundant (2% of the assembly identified here,  
511 and 4% reported from manual curation in the pea aphid genome paper, [5]). Across  
512 species, the remaining repeat categories appear to grow proportionally with assembly  
513 size, except for simple repeats, which were the category with the largest relative  
514 increase in size after gap-filling in *Oncopeltus* (see also Supplemental Note 2.3).  
515 However, given the mix of sequence data types (Illumina only in the bed bug [11],  
516 Sanger in the pea aphid [5]), these patterns should be treated as hypotheses for future  
517 testing, until the assembly of repetitive regions becomes more feasible.

518

519

## 520 **Lineage and genome size-related trends in insect gene structure**

521 During manual curation, we noticed that *Oncopeltus* genes were often comprised of  
522 many, small exons. Furthermore, sequence conservation among the Hemiptera  
523 supported terminal coding sequence exons that were small and separated from the rest  
524 of the gene model by large introns. To explore patterns of gene structure across the  
525 insects, we undertook a broader comparative analysis. We find that both lineage and  
526 genome size can serve as predictors of gene structure.

527

528 Firstly, we created a high quality (“gold standard”) dataset of 30 functionally  
529 diverse, large genes whose manual curation could reasonably ensure complete gene  
530 models across seven species from four insect orders (Fig. 6a; see also Supplemental  
531 Note 6.3). Most species encode the same total number of amino acids for these  
532 conserved proteins, with the thrips *Frankliniella occidentalis* and *Drosophila* being  
533 notable exceptions with larger proteins (Fig. 6a: blue plot line). However, the means  
534 of encoding this information differs between lineages, with hemipteroid orthologs  
535 comprised of twice as many exons as their holometabolous counterparts (Fig. 6a:  
536 orange plot line). Thus, there is an inverse correlation between exon number and  
537 exon size (Fig. 6a: orange vs. red plot lines). This analysis corroborates and extends  
538 previous probabilistic estimates of intron density, where the pea aphid as a sole  
539 hemipteran representative had the highest intron density of ten insect species [72].

540

541 To test these trends, we next expanded our analysis to all manually curated  
542 exons in two species from each of three orders, including the Mediterranean fruit fly,  
543 *Ceratitis capitata* [73], as a second dipteran alongside *Drosophila melanogaster*.  
544 Here, we expect that curated exon sizes are accurate, without the need to assume that  
545 entire gene models are complete. This large dataset supports our original findings,  
546 with bugs having small exons, and with both the median and Q3 quartile reflecting  
547 larger exon sizes in beetles and flies (Fig. 6b). Notably, the median and median  
548 absolute deviation are highly similar between species pairs within the Hemiptera and  
549 Coleoptera, irrespective of sample size. Meanwhile, the different exon metrics  
550 between *Ceratitis* and *Drosophila* suggest that the large protein sizes we initially  
551 observed in *Drosophila* (Fig. 6a: blue plot line) are a general but drosophilid-specific,  
552 rather than dipteran-wide, feature.

553  
554 Does the high exon count in the Hemiptera reflect an ancient, conserved  
555 increase at the base of this lineage, or ongoing remodeling of gene structure with high  
556 turnover? To assess the exact nature of evolutionary changes, we annotated intron  
557 positions within multiple sequence alignments of selected proteins and plotted gains  
558 and losses onto the phylogeny, providing a total sample of 165 evolutionary changes  
559 at 148 discrete splice sites (Fig. 7; see also Supplemental Note 6.3 for gene selection  
560 and method). These data reveal several major correlates with intron gain or loss. The  
561 bases of both the hemipteroid and hemipteran radiations show the largest gains, while  
562 most losses occur in the dipteran lineage (Fig. 7: orange and purple shading,  
563 respectively). Furthermore, we find progressive gains across the hemipteroid nodes,  
564 and it is only in these species that we additionally find species-specific splice changes  
565 for the highly conserved *epimerase* gene (Fig. 7: orange outline). Thus, we find  
566 evidence for both ancient intron gain and ongoing gene structure remodeling in this  
567 lineage.

568  
569 Surprisingly, both *hemocytin* and *epimerase* – our exemplar genes with many  
570 (up to 74) and very few exons (3-8 per species), respectively – show independent  
571 losses of the same splice sites in *Drosophila* and *Tribolium*. One feature these species  
572 share is a genome size 2.4-6.0× smaller than all other species examined here (Fig. 7:  
573 red shading). Pairwise comparisons within orders also support this trend, as the beetle  
574 and fly species with larger genomes exhibit species-specific gains compared to intron  
575 loss in their sister taxa (Fig. 7: red outlines). Thus, while lineage is a stronger  
576 predictor of gene structure evolution (the coleopteran and dipteran species include one  
577 each with a big or small genome and yet have highly similar metrics in Fig. 6b),  
578 genome size seems to positively correlate with intron number (*e.g.*, the common  
579 dipteran ancestor lost introns before *Ceratitis*, with a larger genome, experienced  
580 subsequent gains: Fig. 7). A global computational analysis over longer evolutionary  
581 distances also supports a link between genome size and intron number within  
582 arthropods, but where chelicerates and insects may experience different rates of  
583 evolutionary change in these features [74]. As new insect species' genomes are  
584 sequenced, gene structure expectations at the ordinal level can help customize  
585 parameters for automatic gene annotation, while it will be interesting to see if the  
586 correlation with genome size is borne out in other taxa.

587  
588 The selective pressures and mechanisms of intron gain in the Hemiptera will  
589 be a challenge to uncover. While median exon size (Fig. 6b) could reflect species-  
590 specific nucleosome sizes [75, 76], this does not account for the fact that most

591 hemipteran exons do not occur in multiples greater than a single nucleosome. Given  
592 gaps in draft genome assemblies, we remain cautious about interpreting (large) intron  
593 lengths but note that many hemipteran introns are too small to have harbored a  
594 functional transposase gene (*e.g.*, median intron size of 429 bp,  $n=69$  introns in  
595 *hemocytin* in *Cimex*). Such small introns could be consistent with proliferation of  
596 non-autonomous short interspersed nuclear elements (SINEs), although as highly  
597 divergent non-coding elements their characterization in insects would require curated  
598 SINE libraries comparable to those generated for vertebrates and plants [75, 76].  
599 Meanwhile, it appears that hemipteran open reading frames  $\geq 160$  bp are generally  
600 prevented by numerous in-frame stop codons just after the donor splice site. Most  
601 stop codons are encoded by the triplet TAA in both *Oncopeltus* and *Cimex* (data not  
602 shown), although these species' genomes are not particularly AT-rich (Table 1).

603

604 Even if introns are small, having gene loci comprised of numerous introns and  
605 exons adds to the cost of gene expression in terms of both transcription duration and  
606 mRNA processing. One could argue that a gene like *hemocytin*, which encodes a  
607 clotting agent, would require rapid expression in the case of wounding – a common  
608 occurrence in adult *Cimex* females due to the traumatic insemination method of  
609 reproduction [11]. Thus, as our molecular understanding of comparative insect and  
610 particularly hemipteran biology deepens, we will need to increasingly consider how  
611 life history traits are manifest in genomic signatures at the structural level (*e.g.*, Figs.  
612 5-7), as well as in terms of protein repertoires (Figs. 3-4).

613

614

#### 615 **Expansion after a novel lateral gene transfer (LGT) event in phytophagous bugs**

616 In addition to the need for cuticle repair, traumatic insemination may be responsible  
617 for the numerous LGT events predicted in the bed bug [11]. In contrast, the same  
618 pipeline analyses [77] followed by manual curation predicted very few LGTs in  
619 *Oncopeltus*, which lacks this unusual mating behavior. Here, we have identified 11  
620 strong LGT candidates, and we confirmed the incorporation of bacterial DNA into the  
621 milkweed bug genome for all five candidates chosen for empirical testing (see also  
622 Table S2.4). Curiously, we find several LGTs potentially involved in bacterial or  
623 plant cell wall metabolism that were acquired from different bacterial sources at  
624 different times during hemipteran lineage evolution, including two distinct LGTs that  
625 are unique to *Oncopeltus* and implicated in the synthesis of peptidoglycan, a bacterial  
626 cell wall constituent (see also Supplemental Note 2.2).

627

628 Conversely, two further validated LGT candidates encode enzymes rather  
629 known for their roles in degradation of bacterial cell walls: we find two strongly  
630 expressed, paralogous copies in *Oncopeltus* of a probable bacterial-origin gene  
631 encoding an endo-1,4-beta-mannosidase enzyme (MAN4, EC 3.2.1.78). This likely  
632 ancient LGT event provides an interesting vignette that further illustrates gene  
633 structure evolution processes within the Hemiptera. Inspection of genome assemblies  
634 and predicted protein accessions reveals that this LGT event is shared with the stink  
635 bug *Halyomorpha halys*, a member of the same infraorder (Pentatomomorpha), but  
636 was introduced after this lineage diverged from other hemipterans, including the bed  
637 bug (Fig. 8a). Furthermore, whereas *Oncopeltus* now has two copies of this gene,  
638 independently the original *Halyomorpha* gene underwent a series of tandem  
639 duplications leading to nine extant copies (Fig. 8b, see also Fig. S2.6). Since the  
640 original LGT event, the *mannosidase* genes in both bug species have become

641 “domesticated” as multi-exonic genes (as in [78]). Moreover, as the splice site pattern  
642 is unique to each species and evinces subsequent splice introductions in subsets of  
643 paralogs (Fig. 8c), *mannosidase* genes further illustrate the hemipteran penchant for  
644 intron introduction and maintenance of small exons. The retention and subsequent  
645 expansion of these genes implies their positive selection, consistent with the  
646 phytophagous diet of these hemipteran species. In this context, it is tempting to  
647 speculate further that the marked proliferation of this enzyme in the stink bug  
648 correlates with the breadth of its diet, as this agricultural pest feeds on a number of  
649 different tissues in a range of host plants [79].

650  
651

### 652 **Cuticle development, structure, and warning pigmentation**

653 Given the milkweed bug’s history as a powerful model for endocrine studies of  
654 hemimetabolous molting and metamorphosis since the late 1960’s [21, 80-83], we  
655 next focused on genes underlying the development and structural properties of the  
656 *Oncopeltus* cuticle. Molting is triggered by the release of ecdysteroids, steroid  
657 hormones that are synthesized from cholesterol in the prothoracic gland by  
658 cytochrome P450 enzymes of the Halloween family [84], and we were able to identify  
659 these in the *Oncopeltus* genome (see also Supplemental Notes 5.2.b, 5.3.b for these  
660 and following metamorphosis gene details). From the ecdysone response cascade  
661 defined in *Drosophila* [85], we identified *Oncopeltus* orthologs of both early and late-  
662 acting factors. It will be interesting to see if the same regulatory relationships are  
663 conserved in the context of hemimetabolous molting in *Oncopeltus*. For example,  
664 *E75A* is required for reactivation of ecdysteroid production during the molt cycle in  
665 *Drosophila* larvae [86] and likely operates similarly in *Oncopeltus*, since *Of-E75A*  
666 RNAi prevents fourth-instar nymphs from molting to the fifth instar (H. Kelstrup and  
667 L. Riddiford, unpublished data). In holometabolous insects, a declining titer of  
668 ecdysteroids leads to the release of a series of neuropeptides that ultimately causes the  
669 insect to molt, or ecdyse [87, 88]. Orthologs of these hormones and their receptors  
670 are also present in the *Oncopeltus* genome or transcriptomic data.

671  
672

673 In hemipterans, activation of juvenile hormone (JH) signaling at molts  
674 determines whether the insect progresses to another nymphal instar or, if lacking,  
675 becomes an adult [47]. We were able to identify many components of the JH signal  
676 transduction pathway in the *Oncopeltus* genome, including an ortholog of  
677 *Methoprene-tolerant* (*Met*), the JH receptor [47, 89], and the JH-response gene *Kr-h1*  
678 [47, 90, 91]. JH acts to determine cuticle identity through regulation of the *broad*  
679 gene in a wide variety of insects, where different isoforms direct specific aspects of  
680 metamorphosis in *Drosophila* [92, 93]. In *Oncopeltus*, *broad* expression directs  
681 progression through each of the nymphal stages [94], but the effect of each isoform  
682 was unknown. We identified three isoforms in *Oncopeltus* – Z2, Z3, and Z4 – and  
683 performed isoform-specific RNAi. In contrast to *Drosophila*, *Broad* isoform  
684 functions appear to be more redundant in *Oncopeltus*, as knockdown of isoforms Z2  
685 and Z3 have similar effects on survival to adulthood as well as adult wing size and  
686 morphology (Fig. 9).

687  
688

689 Regulators such as *Broad* initiate the transcription of a large battery of genes  
690 that encode the structural components of the cuticle needed at each molt, consistent  
691 with our expression analyses (Fig. 2b, discussed above). We identified 173 genes  
692 encoding putative cuticle structural proteins in the milkweed bug, using established

691 sequence motifs (see also Supplemental Note 5.2.c). Similar to other insects, the CPR  
692 family, with the RR-1 (soft cuticle), RR-2 (hard cuticle), and unclassifiable types,  
693 constituted the largest of the cuticle protein gene groups. While several protein  
694 families are similar in size to those of other insects (CPAP1, CPAP3, and TWDL: see  
695 also Table S5.12), we found a slight expansion in the *Oncopeltus* CPF family (see  
696 also Fig. S5.14). For cuticle production, similar to the bed bug and the Asian  
697 longhorned beetle [11, 29], we identified a single *chitin synthase* gene with conserved  
698 alternative splice isoforms, which suggests that *chitin synthase 2* is a duplication  
699 specific to only certain beetle and fly lineages within the Holometabola [95].

700

701 One of the major characteristics of the milkweed bug is the distinctive red-  
702 orange and black aposematic (warning) coloration within the cuticle and epidermis  
703 that has been shown to act as a deterrent to predators (*e.g.*, Figs. 1, 9, [19, 20]). For  
704 black coloration, we were able to identify the key melanin synthesis enzymes (see  
705 also Fig. S5.15). The melanin synthesis pathway is conserved across holometabolous  
706 insects (*e.g.*, [96, 97]), and recent work in *Oncopeltus* [98, 99] supports functional  
707 conservation of melanin production in hemimetabolous lineages as well. In contrast,  
708 production of the primary warning coloration produced by the pteridine red  
709 erythropterin [100] remains an open avenue for hemimetabolous research. This  
710 pigment, along with other pterins, is synthesized from GTP through a series of  
711 enzymatic reactions [101]. The genes encoding enzymes that convert GTP into  
712 pterins have not been as extensively studied as melanins, and thus far in *Oncopeltus*  
713 we were only able to identify orthologs of *punch*, which encodes a GTP  
714 cyclohydrolase [102], and *sepia*, which is required for the synthesis of the red eye  
715 pigment drosoppterin [103]. The bright red color of *Oncopeltus* eggs may in part  
716 reflect chemical protection transmitted parentally [104]. Thus, further identification  
717 of pigmentation genes will provide fitness indicators for maternal contributions to  
718 developmental success under natural conditions (*i.e.*, the presence of egg predators).

719

720

### 721 **Chemoreception and metabolism in relation to feeding biology**

722 The aposematic pigmentation of the milkweed bug advertises the fact that toxins in its  
723 milkweed seed diet are incorporated into the bugs themselves, a metabolic feat that  
724 was independently acquired in *Oncopeltus* and in the similarly colored monarch  
725 butterfly (*Danaus plexippus*), which shares this food source [35, 105]. Moreover,  
726 given the fundamental differences in metabolic pathways between phytophagous,  
727 mucivorous, and hematophagous species, we investigated to what extent differences  
728 in feeding ecology across hemipterans are represented in the chemoreceptor and  
729 metabolic enzyme repertoires of these species.

730

731 The ability of insects to smell and taste the enormous diversity of chemicals  
732 important to them for locating and identifying food, mates, oviposition sites, and other  
733 aspects of their environment is primarily mediated by three large gene families. The  
734 closely related Odorant Receptor (OR) and Gustatory Receptor (GR) families, and the  
735 distinct Ionotropic Receptor (IR) family [106-109], commonly encode tens to  
736 hundreds of chemoreceptors in arthropods. Consistent with having a less derived  
737 feeding ecology than species with phloem-restricted or obligate hematophagous diets,  
738 *Oncopeltus* retains a moderate complement of chemoreceptors from the different  
739 classes (Table 2, see also Supplemental Note 5.3.f). The hematophagous *Cimex* and  
740 *Rhodnius* have relatively depauperate OR and GR families compared to *Oncopeltus*.



741 While a few conserved orthologs such as the OrCo protein and a fructose receptor are  
 742 found across species, *Oncopeltus* and *Acyrtosiphon* retain a set of sugar receptors, a  
 743 gene lineage lost independently from the blood-feeding bugs (*Rhodnius* [10], *Cimex*  
 744 [11]) and body louse (*Pediculus* [110]). Conversely, *Oncopeltus* has, like *Cimex*, a  
 745 set of candidate carbon dioxide receptors, a gene lineage lost from *Rhodnius*,  
 746 *Acyrtosiphon*, and *Pediculus* [10, 11, 111], but which is similar to a GR subfamily  
 747 expansion in the more distantly related hemimetabolous termite (Isoptera, [112]).  
 748 Comparable numbers of IRs occur across the heteropterans, where in addition to a  
 749 conserved set of orthologs primarily involved in sensing temperature and certain acids  
 750 and amines, *Oncopeltus* has a minor expansion of IRs distantly related to those  
 751 involved in taste in *Drosophila*. The major expansions in each insect lineage are the  
 752 candidate “bitter” GRs ([113], see also Supplemental Note 5.3.f, Fig. S5.19). In  
 753 summary, *Oncopeltus* exhibits moderate expansion of specific subfamilies likely to be  
 754 involved in host plant recognition, consistent with it being a preferentially specialist  
 755 feeder with a potentially patchy food source [20, 114].

756  
757

758

759 **Table 2. Numbers of chemoreceptor genes/proteins per family in selected insect**  
 760 **species.** In some cases the number of proteins is higher than the number of genes due  
 761 to an unusual form of alternative splicing, which is particularly notable for the  
 762 *Oncopeltus* GRs. Data are shown for four Hemiptera as well as *Drosophila*  
 763 *melanogaster*, the body louse *Pediculus humanus*, and the termite *Zootermopsis*  
 764 *nevadensis* [10, 11, 108, 110-112, 115].

765

| Species                                  | Odorant | Gustatory | Ionotropic |
|------------------------------------------|---------|-----------|------------|
| <i>Oncopeltus fasciatus</i> <sup>1</sup> | 120/121 | 115/169   | 37/37      |
| <i>Cimex lectularius</i> <sup>1,2</sup>  | 48/49   | 24/36     | 30/30      |
| <i>Rhodnius prolixus</i> <sup>1,2</sup>  | 116/116 | 28/30     | 33/33      |
| <i>Acyrtosiphon pisum</i> <sup>3</sup>   | 79/79   | 77/77     | 19/19      |
| <i>Pediculus humanus</i> <sup>2</sup>    | 12/13   | 6/8       | 14/14      |
| <i>Zootermopsis nevadensis</i>           | 70/70   | 87/90     | 150/150    |
| <i>Drosophila melanogaster</i>           | 60/62   | 60/68     | 65/65      |

766

767 <sup>1</sup> Hemiptera: Heteroptera

768 <sup>2</sup> independent acquisitions of hematophagy [16]

769 <sup>3</sup> Hemiptera, phloem-feeding

770

771

772

773 As host plant recognition is only the first step, we further explored whether  
 774 novel features of the *Oncopeltus* gene set may be directly associated with its diet. We  
 775 therefore used the CycADS annotation pipeline [116] to reconstruct the *Oncopeltus*  
 776 metabolic network. The resulting BioCyc metabolism database for *Oncopeltus*  
 777 (“OncfaCyc”) was then compared with those for 26 other insect species in the current  
 778 ArthropodaCyc collection ([117], <http://arthropodacyc.cycadsys.org/>), including three  
 779 other hemipterans: the pea aphid, the green peach aphid, and the kissing bug (Tables  
 780 3-4). For a global metabolism analysis, we detected the presence of 1085 Enzyme  
 781 Commission (EC) annotated reactions with at least one protein in the *Oncopeltus*  
 782 genome (see also Supplemental Note 6.4, Table S6.9). Among these, 10 enzyme

783 classes (represented by 17 genes) are unique and 17 are missing when compared to  
 784 the other insects (Table 4, Table S6.10).

785

786

787

788 **Table 3. Hemipteran ArthropodaCyc database summaries.**

789 Overview statistics for the newly created database for *Oncopeltus fasciatus* (Ofas) in  
 790 comparison with public databases for *Rhodnius prolixus* (Rpro), *Acyrtosiphon pisum*  
 791 (*Apis*), and *Myzus persicae* (Mper) available from [117]. Based on OGS v1.1.  
 792

| Species ID              | <i>Ofas</i> | <i>Rpro</i>                                  | <i>Apis</i>                                     | <i>Mper</i>        | <i>Mper</i>     |
|-------------------------|-------------|----------------------------------------------|-------------------------------------------------|--------------------|-----------------|
| Gene set ID             | OGS v1.1    | RproC1.1<br>(Built on<br>RproC1<br>assembly) | OGS v2.1b<br>(Built on<br>Acyr_2.0<br>assembly) | Clone G006<br>v1.0 | Clone O<br>v1.0 |
| CycADS Database ID      | OncfaCyc    | RhoprCyc                                     | AcypicCyc<br>v2.1b                              | Myzpe_G006<br>Cyc  | Myzpe_O<br>Cyc  |
| Total mRNA <sup>1</sup> | 19,673      | 15,437                                       | 36,195                                          | 24,814             | 24,770          |
| Pathways                | 294         | 312                                          | 307                                             | 319                | 306             |
| Enzymatic Reactions     | 2,192       | 2,366                                        | 2,339                                           | 2,384              | 2,354           |
| Polypeptides            | 19,820      | 15,471                                       | 36,228                                          | 24,849             | 24,805          |
| Enzymes                 | 3,050       | 2,660                                        | 5,087                                           | 4,646              | 4,453           |
| Compounds               | 1,506       | 1,665                                        | 1,637                                           | 1,603              | 1,655           |

793

794 <sup>1</sup> In the BioCyc databases all splice variants are counted in the summary tables for  
 795 genes.

796

797

798

799

800 **Table 4. Hemipteran ArthropodaCyc annotations of metabolic genes.**

801 Taxonomic abbreviations are as in Table 3.

802

|                                             | <i>Ofas</i>     | <i>Rpro</i> | <i>Apis</i> | <i>Mper</i> |
|---------------------------------------------|-----------------|-------------|-------------|-------------|
| <b>Global metabolism</b>                    |                 |             |             |             |
| EC <sup>1</sup> present in the genome       | 1085            | 1241        | 1288        | 1222        |
| EC unique to this genome <sup>2</sup>       | 10              | 13          | 23          | 5           |
| EC missing only in this genome <sup>2</sup> | 17 <sup>4</sup> | 8           | 2           | 6           |
| <b>Amino acid metabolism (KEGG)</b>         |                 |             |             |             |
| EC present in the genome                    | 169             | 188         | 195         | 185         |
| EC unique to this genome <sup>2</sup>       | 2               | 1           | 6           | 1           |
| EC missing only in this genome <sup>2</sup> | 5               | 2           | 0           | 2           |
| EC unique to this genome <sup>3</sup>       | 8               | 10          | 12          | 8           |
| EC missing only in this genome <sup>3</sup> | 14              | 5           | 0           | 2           |

803

804 <sup>1</sup> “EC” refers to the number of proteins, as represented by their unique numerical  
 805 designations within the Enzyme Commission (EC) classification system for enzymes  
 806 and their catalytic reactions.

807 <sup>2</sup> in comparison to all other insects from ArthropodaCyc

808 <sup>3</sup> in comparison among the four hemipterans

809 <sup>4</sup> includes three EC categories added in OGS v1.2 (see also Table S6.10)

810

811

812

813

814

815

816

817

818

819

820

821

822

823

824

825

826

827

828

829

830

831

832

833

834

835

836

837

838

839

840

841

842

843

844

845

846

847

848

849

We then looked specifically at amino acid metabolism in four hemipterans representing the three different diets (see also Table S6.11). Among eight EC annotated enzymes present in the milkweed bug genome but not the other three, we identified the arginase (E.C. 3.5.3.1) that degrades arginine (Arg) into urea and ornithine, a precursor of proline (Pro). Given this difference, we extended our analysis to the entire urea cycle (Fig. 10a). Across all 26 insects present in the database, we identified three distinct groups (see also Table S6.12): (i) *Oncopeltus* and six other non-hemipteran insects that are able to degrade Arg but cannot synthesize it (Fig. 10b); (ii) the other three hemipterans that uniquely can neither synthesize nor degrade Arg via this cycle (Fig. 10c); and (iii) the other 17 insects that, with some minor differences, have an almost complete cycle (Fig. 10d). This suggests that loss of the ability to synthesize Arg may already have occurred at the base of the Hemiptera, with subsequent, independent loss of Arg degradation capacity in the aphid and *Rhodnius* lineages. Retention of Arg degradation in *Oncopeltus* might be linked to the milkweed seed food source, as most seeds are very rich in Arg [118], and Arg is indeed among the metabolites detected in *Oncopeltus* [119]. However, the monarch butterfly is one of only a handful of species that retains the complete Arg pathway (Fig. 10d: blue text). Despite a shared food source, these species may therefore differ in their overall Arg requirements, or – in light of a possible group benefit of *Oncopeltus* aggregation during feeding [20] – in their efficiency of Arg uptake.

834

835

836

837

838

839

840

841

842

843

844

845

846

847

848

849

Other enzymes are also present only in the milkweed bug in comparison with the other hemipterans (see also Table S6.11). As would be expected, *Oncopeltus*, like other insects [117], has the ability to degrade tyrosine (Tyr), a pathway that was uniquely lost in the aphids. Given the variable yields of Tyr from a mucivorous diet [120], this amino acid needed for cuticle maturation (sclerotization) is jointly synthesized – and consumed – by the aphid host and its endosymbiotic bacteria [5, 6, 15, 121]. Meanwhile, we find support for the recent nature of milkweed bug lineage-specific duplications that led to three copies of the Na<sup>+</sup>/K<sup>+</sup> ATPase alpha subunits whose amino acid substitutions confer increased resistance to milkweed cardenolides [35, 122]. In the *Oncopeltus* genome, the genes encoding subunits ATP $\alpha$ 1B and ATP $\alpha$ 1C occur as a tandem duplication, notably on a scaffold that also harbors one of the clustered ZF271-like gene expansions (see above).

847

848

849

## CONCLUSIONS

850

851

852

853

854

855

856

857

858

859

860

The integrated genomic and transcriptomic resources presented here for the milkweed bug *Oncopeltus fasciatus* (Figs. 2,5) underpin new insights into molecular evolution and suites of related biological characters within the Hemiptera. The gene structure trends we identified, with lineage predominating over genome size as a predictor and with many intron gains in the hemipteroid lineage (Figs. 6,7), offer initial parameters and hypotheses for the Hemiptera, Coleoptera, and Diptera. Such ordinal-level parameters can be evaluated against new species' data and also inform customized pipelines for future automated gene model predictions. At the same time, it will be interesting to explore the ramifications of hemipteroid intron gains. For example, while possessing more, small exons brings an increased transcriptional cost, it may

861 also provide greater scope to generate protein modularity via isoforms based on  
862 alternative exon usage. Furthermore, with the larger genome sizes and lower gene  
863 densities of hemipteroids compare to the well-studied Hymenoptera, it will also be  
864 interesting to see whether and in which direction hemipteroid gene and intron size  
865 may correlate with recombination rates [123].

866  
867 Our analyses also highlight new directions for future experimental research,  
868 building on *Oncopeltus*'s long-standing history as a laboratory model and its active  
869 research community in the modern molecular genetics era (e.g., Fig. 9, [24-26]).  
870 Functional testing will clarify the roles of genes we have identified as unique to the  
871 Hemiptera, including those implicated in chemical protection, bacterial and plant cell  
872 wall metabolism, or encoding wholly novel proteins (Figs. 3,8, see also Supplemental  
873 Note 2.2). Meanwhile, the prominent and species-specific expansions specifically of  
874 ZF271-like zinc fingers (Fig. 4), combined with the absence of the co-repressor KAP-  
875 1 in insects, argues for investigation into alternative possible interaction partners,  
876 which could clarify the nature of these zinc fingers' regulatory role and their binding  
877 targets.

878  
879 One key output of this study is the generation of a metabolism database for  
880 *Oncopeltus*, contributing to the ArthropodaCyc collection (Table 3). In addition to  
881 comparisons with other species (Fig. 10), this database can also serve as a future  
882 reference for studies that use *Oncopeltus* as an ecotoxicology model species (e.g.,  
883 [124]). While we have primarily focused on feeding ecology in terms of broad  
884 comparisons between phytophagy and fluid feeding, *Oncopeltus* is also poised to  
885 support future work on nuances among phytophagous species. Despite its milkweed  
886 diet in the wild, the lab strain of *Oncopeltus* has long been adapted to feed on  
887 sunflower seeds, demonstrating a latent capacity for more generalist phytophagy  
888 [114]. This potential may also be reflected in a larger gustatory receptor repertoire  
889 than would be expected for an obligate specialist feeder (Table 2). Thus, *Oncopeltus*  
890 can serve as a reference species for promiscuously phytophagous pest species such as  
891 the stink bug. Finally, given that we have identified a number of key genes  
892 implicated in life history trade-offs, the genome data represent an important tool to  
893 explore the proximate mechanisms of fundamental aspects of life history evolution in  
894 an organism in which the ultimate explanations for traits such as cardenolide  
895 tolerance, pigmentation, and plasticity in reproduction under environmental variation  
896 have been elucidated in both the laboratory and nature.

897  
898  
899

## 900 **METHODS**

901 (More information is available in the supplementary materials, Additional file 1.)

902

### 903 **Milkweed bug strain, rearing, and DNA/RNA extraction**

904 The milkweed bug *Oncopeltus fasciatus* (Dallas), Carolina Biological Supply strain  
905 (Burlington, North Carolina, USA), was maintained in a laboratory colony under  
906 standard husbandry conditions (sunflower seed and water diet, 25 °C, 12:12 light-dark  
907 photoperiod). Voucher specimens for an adult female (record # ZFMK-TIS-26324)  
908 and adult male (record # ZFMK-TIS-26325) have been preserved in ethanol and  
909 deposited in the Biobank of the Centre for Molecular Biodiversity Research,  
910 Zoological Research Museum Alexander Koenig, Bonn, Germany  
911 (<https://www.zfmk.de/en/biobank>).

912

913 Genomic DNA was isolated from individual, dissected adults using the Blood  
914 & Cell Culture DNA Midi Kit (G/100) (Qiagen Inc., Valencia, California, USA).  
915 Total RNA was isolated from individual, dissected adults and from pooled, mixed-  
916 instar nymphs with TRIzol Reagent (Invitrogen/ Thermo Fisher Scientific, Waltham,  
917 Massachusetts, USA). Dissection improved accessibility of muscle tissue by  
918 disrupting the exoskeleton, and gut material was removed.

919

### 920 **Genome size calculations (flow cytometry, *k*-mer estimation)**

921 Genome size estimations were obtained by flow cytometry with Hare and Johnston's  
922 protocol [125]. Four to five females and males each from the Carolina Biological  
923 Supply lab strain and a wild strain (collected from Athens, Georgia, USA; GPS  
924 coordinates: 33° 56' 52.8216" N, 83° 22' 38.3484" W) were measured (see also  
925 Supplemental Note 2.1.a). At the bioinformatic level, we attempted to estimate  
926 genome size by *k*-mer spectrum distribution analysis for a range of *k*=15 to 34  
927 counted with Jellyfish 2.1.4 [126] and bbmap [127], graphing these counts against the  
928 frequency of occurrence of *k*-mers (depth), and calculating genome size based on the  
929 coverage at the peak of the distribution (see also Supplemental Note 2.1.b).

930

### 931 **Genome sequencing, assembly, annotation, and official gene set overview**

932 Library preparation, sequencing, assembly, and automatic gene annotation were  
933 conducted at the Baylor College of Medicine Human Genome Sequencing Center (as  
934 in [11, 29]). About 1.1 billion 100-bp paired-end reads generated on an Illumina  
935 HiSeq2000s machine were assembled using ALLPATHS-LG [128], from two paired-  
936 end (PE) and two mate pair (MP) libraries specifically designed for this algorithm  
937 (see also Supplemental Note 1). Three libraries were sequenced from an individual  
938 adult male (180- and 500-bp PE, 3-kb MP), with the fourth from an individual adult  
939 female (8-10-kb MP). The final assembly (see metrics in Table 1) has been deposited  
940 in GenBank (accession GCA\_000696205.1).

941

942 Automated annotation of protein-coding genes was performed using a Maker  
943 2.0 annotation pipeline [129] tuned specifically for arthropods (see also Supplemental  
944 Note 3). These gene predictions were used as the starting point for manual curation  
945 via the Apollo v.1.0.4 web browser interface [130], and automatic and manual  
946 curations were compiled to generate the OGS (see also Supplemental Note 4).  
947 Databases of the genome assembly, Maker automatic gene predictions, and OGS v1.1  
948 are available through the i5K Workspace@NAL [131], and the Ag Data Commons  
949 data access system of the United States Department of Agriculture's (USDA) National

950 Agricultural Library as individual citable databases [132-134]. The current version of  
951 the gene set, OGS v1.2, will be deposited in NCBI under accession number XXX.

952

### 953 **Repeat content analysis**

954 Repetitive regions were identified in the *Oncopeltus* genome assembly with  
955 RepeatModeler Open-1.0.8 [135] based on a species-specific repeat library generated  
956 *de novo* with RECON [136], RepeatScout [137], and Tandem Repeats Finder [138].  
957 Then, RepeatMasker Open-4.0 [139] was used to mask repeat sequences based on the  
958 RepeatModeler library. Given the fragmented nature of the assembly, we attempted  
959 to fill and close assembly gaps by sequencing additional material, generating long  
960 reads with single molecule real time sequencing on a PacBio RS II machine (34  
961 SMRT cells to an expected coverage of 8x, see also Supplemental Note 2.3). Gap  
962 filling on the Illumina assembly scaffolds was performed with PBJelly version  
963 13.10.22, and the resulting assembly was used for repeat content estimation and  
964 comparison with *Cimex lectularius* and *Acyrtosiphon pisum*.

965

### 966 **Transcriptome resources**

967 Total RNA from three distinct life history samples (pooled, mixed-instar nymphs; an  
968 adult male; an adult female) was also sequenced on an Illumina HiSeq2000s machine,  
969 producing a total of 72 million 100-bp paired-end reads (see also Supplemental Note  
970 1.3, Table S1.1). These expression data were used to support the generation of the  
971 OGS at different stages of the project: as input for the evidence-guided automated  
972 annotation with Maker 2.0 (see also Supplemental Note 3), as expression evidence  
973 tracks in the Apollo browser to support the community curation of the OGS, and,  
974 once assembled into a *de novo* transcriptome, as a point of comparison for quality  
975 control of the OGS.

976

977 The raw RNA-seq reads were pre-processed by filtering out low quality bases  
978 (phred score <30) and Truseq adapters with Trimmomatic-0.30. Further filtering  
979 removed ribosomal and mitochondrial RNA sequences with Bowtie 2 [140], based on  
980 a custom library built with all hemipteran ribosomal and mitochondrial RNA  
981 accessions from NCBI as of 7<sup>th</sup> February 2014 (6,069 accessions). The pooled,  
982 filtered reads were mapped to the genome assembly with Tophat2-PE on CyVerse  
983 [141]. A second set of RNA-seq reads from an earlier study (“published adult”  
984 dataset, [35]) was also filtered and mapped in the same fashion, and both datasets  
985 were loaded into the *Oncopeltus* Apollo instance as evidence tracks (under the track  
986 names “pooled RNA-seq - cleaned reads” and “RNA-seq raw PE reads Andolfatto et  
987 al”, respectively).

988

989 Additionally, a *de novo* transcriptome was generated from our filtered RNA-  
990 seq reads (pooled from all three samples prepared in this study) using Trinity [142]  
991 and TransDecoder [143] with default parameters. This transcriptome is referred to as  
992 “i5K”, to distinguish it from a previously published maternal and early embryonic  
993 transcriptome for *Oncopeltus* (referred to as “454”, [34]). Both the i5K and 454  
994 transcriptomes were mapped to the genome assembly with GMAP v. 2014-05-15 on  
995 CyVerse. These datasets were also loaded into the Apollo browser as evidence tracks  
996 to assist in manual curation.

997

## 998 **Life stage specific expression analyses**

999 Transcript expression of the OGS v1.1 genes was estimated by running RSEM2 [144]  
1000 on the filtered RNA-seq datasets for the three postembryonic stages against the OGS  
1001 v1.1 cDNA dataset. Transcript expression was then based on the transcripts per  
1002 million (TPM) value. The TPM values were processed by adding a value of 1 (to  
1003 avoid zeros) and then performing a log<sub>2</sub>-transformation. The number of expressed  
1004 genes per RNA-seq library was compared for TPM cutoffs of >1, >0.5, and >0.25.  
1005 For this first-pass expression assessment, a >0.25 cutoff was chosen, which reduced  
1006 the number of expressed genes by 6.6% compared to the first analysis, while the other  
1007 TPM cutoffs were deemed too restrictive (reducing the expressed gene set by 10.3%  
1008 and 16.6%, respectively, with the >0.5 and >1 cutoffs). This analysis was also  
1009 applied to the “published adult” dataset [35]. To include embryonic stages in the  
1010 comparison, transcripts from the 454 transcriptome were used as blastn queries  
1011 against the OGS v1.1 cDNA dataset (cutoff e-value <10<sup>-5</sup>). The results from all  
1012 datasets were converted to binary format to generate Venn diagrams (Fig. 2b).

1013

## 1014 **Protein gene orthology assessments via OrthoDB and BUSCO analyses**

1015 These analyses follow previously described approaches [41, 42]. See Supplemental  
1016 Note 6.1 for further details.

1017

## 1018 **Global transcription factor identification**

1019 Likely transcription factors (TFs) were identified by scanning the amino acid  
1020 sequences of predicted protein-coding genes for putative DNA binding domains  
1021 (DBDs), and when possible, the DNA binding specificity of each TF was predicted  
1022 using established procedures [56]. Briefly, all protein sequences were scanned for  
1023 putative DBDs using the 81 Pfam [145] models listed in Weirauch and Hughes [146]  
1024 and the HMMER tool [147], with the recommended detection thresholds of Per-  
1025 sequence Eval < 0.01 and Per-domain conditional Eval < 0.01. Each protein was  
1026 classified into a family based on its DBDs and their order in the protein sequence  
1027 (e.g., bZIPx1, AP2x2, Homeodomain+Pou). The resulting DBD amino acid  
1028 sequences were then aligned within each family using Clustal Omega [148], with  
1029 default settings. For protein pairs with multiple DBDs, each DBD was aligned  
1030 separately. From these alignments, the sequence identity was calculated for all DBD  
1031 sequence pairs (*i.e.*, the percent of amino acid residues that are identical across all  
1032 positions in the alignment). Using previously established sequence identity thresholds  
1033 for each family [56], the predicted DNA binding specificities were mapped by simple  
1034 transfer. For example, the DBD of OFAS001246-RA is 98% identical to the  
1035 *Drosophila melanogaster* Bric a Brac 1 (Bab1) protein. Since the DNA binding  
1036 specificity of Bab1 has already been experimentally determined, and the cutoff for the  
1037 Pipsqueak family TFs is 85%, we can infer that OFAS001246-RA will have the same  
1038 binding specificity as *Drosophila* Bab1.

1039

## 1040 **RNA interference**

1041 Double-stranded RNA (dsRNA) was designed to target the final, unique exon of the  
1042 *broad* isoforms Z2, Z3, and Z4. A portion of the coding sequence for the zinc finger  
1043 region from these exons (179 bp, 206 bp, and 216 bp, respectively) was cloned into a  
1044 plasmid vector and used as template for *in vitro* RNA synthesis, using the gene-  
1045 specific primer pairs: Of-Z2\_fwd: 5'-ATGTGGCAGACAAGCATGCT-3'; Of-  
1046 Z2\_rev: 5'-CTAAAATTTGACATCAGTAGGC-3'; Of-Z3\_fwd: 5'-  
1047 ccttctcgttactactcac-3'; Of-Z3\_rev: 5'-ttatatggcgctgtccaa-3'; Of-Z4\_fwd: 5'-

1048 AACACTGACCTTGGTTACACA-3'; Of-Z4\_rev: 5'-  
1049 TAGGTGGAGGATTGCTAAAATT-3'. Two separate transcription reactions (one  
1050 for each strand) were performed using the Ambion MEGAscript kit (Ambion, Austin,  
1051 Texas, USA). The reactions were purified by phenol/chloroform extraction followed  
1052 by precipitation as described in the MEGAscript protocol. The separate strands were  
1053 re-annealed in a thermocycler as described previously [31]. Nymphs were injected  
1054 with a Hamilton syringe fitted with a 32-gauge needle as described [53]. The  
1055 concentration of *Of-Z2*, *Of-Z3* and *Of-Z4* dsRNA was 740 ng/μl, 1400 ng/μl, and  
1056 1200 ng/μl, respectively. All nymphs were injected within 8 hours of the molt to the  
1057 fourth (penultimate juvenile) instar (n ≥ 12 per treatment: see Fig. 9). Fore- and  
1058 hindwings were then dissected from adults and photographed at the same scale as  
1059 wings from wild type, uninjected controls.

1060

### 1061 **CycADS annotation and OncfaCyc database generation**

1062 We used the Cyc Annotation Database System (CycADS, [116]), an automated  
1063 annotation management system, to integrate protein annotations from different  
1064 sources into a Cyc metabolic networks reconstruction that was integrated into the  
1065 ArthropodaCyc database. Using our CycADS pipeline, *Oncopeltus fasciatus* proteins  
1066 from the official gene set OGS v1.1 were annotated using different methods –  
1067 including KAAS [149], PRIAM [150], Blast2GO [151, 152], and InterProScan with  
1068 several approaches [153] – to obtain EC and GO numbers. All annotation  
1069 information data were collected in the CycADS SQL database and automatically  
1070 extracted to generate appropriate input files to build or update BioCyc databases [154]  
1071 using the Pathway Tools software [155]. The OncfaCyc database, representing the  
1072 metabolic protein-coding genes of *Oncopeltus*, was thus generated and is now  
1073 included in the ArthropodaCyc database, a collection of arthropod metabolic network  
1074 databases ([117], <http://arthropodacyc.cycadsys.org/>).

1075

1076

### 1077 **FIGURE LEGENDS**

1078

1079 **Fig. 1. The large milkweed bug, *Oncopeltus fasciatus*, shown in its phylogenetic**  
1080 **and environmental context.**

1081 **(a)** Species tree of selected Hemiptera with genomic and transcriptomic resources,  
1082 based on phylogenetic analyses and divergence time estimates in [3]. Species marked  
1083 with an asterisk (\*) have published resources; those with the appellation “i5K” are  
1084 part of a current pilot project supported by the Baylor College of Medicine Human  
1085 Genome Sequencing Center and the National Agricultural Library of the USDA.  
1086 Note that recent analyses suggest the traditional infraorder Cimicomorpha, to which  
1087 *Rhodnius* and *Cimex* belong, may be paraphyletic [16].

1088 **(b-c)** Milkweed bugs on their native food source, the milkweed plant: gregarious  
1089 nymphs of different instars on a milkweed seed pod (b), and pale, recently eclosed  
1090 adults and their shed exuvia (c). Images were taken at Avalon Park and Preserve,  
1091 Stony Brook, New York, USA, courtesy of Deniz Erezylmaz, used with permission.

1092 **(d)** Individual bugs, shown from left to right: first instar nymphs (ventral and dorsal  
1093 views) and adults (dorsal and lateral views); images courtesy of Kristen Panfilio  
1094 (nymphs) and Jena Johnson (adults), used with permission. The arrow labels the  
1095 labium (the “straw”), part of the hemipteran mouthpart anatomy adapted for feeding  
1096 by piercing and sucking.

1097



1098 **Fig. 2. Comparisons of the official gene set and transcriptomic resources.**  
1099 (a) Area-proportional Venn diagram comparing the OGS v1.1 (“OGS”), a Trinity *de*  
1100 *novo* transcriptome from the three post-embryonic RNA-seq samples (“i5K”), and the  
1101 maternal and embryonic transcriptome from 454 data (“454” [34]). Sample sizes and  
1102 the fraction of each transcriptome represented in the OGS are indicated (for the 454  
1103 dataset, only transcripts with homology identification were considered). The unique  
1104 fraction of each set is also specified (%). Dataset overlaps were determined by blastn  
1105 (best hit only, e-value <10<sup>-9</sup>).  
1106 (b) Four-set Venn diagram representation of OGS v1.1 gene model expression across  
1107 four different life history samples. Values are counts of gene models, with  
1108 percentages also given for the largest subsets. Note that the “Embryo/Maternal”  
1109 sample derives from 454 pyrosequencing data and therefore has a smaller data  
1110 volume than the other samples, which were generated with Illumina sequencing.

1111  
1112 **Fig. 3. Orthology comparisons and phylogenetic placement of *Oncopeltus***  
1113 ***fasciatus* among other Arthropoda.**  
1114 (a) Comparisons of protein-coding gene content in 12 arthropod species, with the  
1115 Hemiptera highlighted in red text. The bar chart shows the number of proteins per  
1116 conservation level (see legend), based on OrthoDB orthology clustering analyses. To  
1117 the left is a maximum likelihood phylogeny based on concatenation of 395 single-  
1118 copy orthologs (all nodes have 100% support unless otherwise noted; branch length  
1119 unit is substitutions per site). The inset pie chart shows the proportion of proteins per  
1120 conservation level in *Oncopeltus* (“Ofas”). See also Supplemental Note 6.1.  
1121 (b) Proportion of *Oncopeltus* proteins that have expression and/or curation validation  
1122 support per conservation level (same color legend as in (a)). Expression support is  
1123 based on the life history stage data in Fig. 2b.  
1124 (c) Protein orthology data evaluated by taxonomic grouping, based on the OrthoDB  
1125 v8 i5K “Insecta” analysis with 64 species, a subset of the recently released OrthoDB  
1126 v9 (<http://www.orthodb.org>): Hemiptera (red, 8 species); other hemimetabolous  
1127 species (paraphyletic, yellow, 6 species); Holometabola (purple, 50 species). Values  
1128 are given for both orthogroups (black text, defined in [42]) and protein-coding genes  
1129 (blue text). As analyses that require all species to be represented in a given  
1130 orthogroup are limited by the quality of every species’ OGS, the cutoff for orthogroup  
1131 presence in a given Venn diagram set was rather that roughly half of all relevant  
1132 species are included, and strictly no species from a different set are permitted. Set [A]  
1133 contains ≥10 hemimetabolous species (allowing for 4-8 Hemiptera and 2-6 other  
1134 hemimetabolous species). Set [B] contains ≥4 Hemiptera and ≥25 Holometabola. Set  
1135 [C] contains ≥2 other hemimetabolous species and for the Holometabola at least one  
1136 representative from each of the Hymenoptera, Coleoptera, Lepidoptera, and Diptera.  
1137 Analyses based on OGS v1.1.

1138  
1139 **Fig. 4. Distribution of transcription factor families across insect genomes.**  
1140 (a) Heatmap depicting the abundance of transcription factor (TF) families across 17  
1141 insect genomes (Hemiptera highlighted in red text), with *Daphnia* as an outgroup.  
1142 Each entry indicates the number of TF genes for the given family in the given  
1143 genome, based on the presence of predicted DNA binding domains (see Methods).  
1144 The color key has a log (base 2) scale (light blue means the TF family is completely  
1145 absent). Values are in Supplementary Table S6.2.  
1146 (b) Bar graph showing the number of proteins of each of the two most abundant TF  
1147 families, homeodomains and C2H2 zinc fingers (ZFs), per species. Solid lines

1148 demarcate insect orders: Hemiptera (Hemipt.), Hymenoptera (Hym.), Coleoptera  
1149 (Col.), and Diptera (Dipt.). The dashed line demarcates the dipteran family Culicidae  
1150 (mosquitoes).  
1151 (c) Proportions of *Oncopeltus* homeodomain (HD) and C2H2 zinc finger proteins  
1152 with orthology assignment (predicted DNA binding specificity) and/or manual  
1153 curation. “Classified” refers to automated classification of a protein to a TF family,  
1154 but without a specific orthology assignment.  
1155 (d) Maximum likelihood phylogeny of representative subsets of the zinc finger 271-  
1156 like family in *Oncopeltus* (49 proteins, blue text) and protein accessions retrieved  
1157 from GenBank for the pea aphid (55 proteins, black text) as well as chelicerate (red  
1158 text) and holometabolan (yellow text) outgroups (16 proteins, 7 species). Gaps were  
1159 removed during sequence alignment curation, with default pipeline settings [156]. All  
1160 nodes have  $\geq 50\%$  support. Key nodes are circled for the distinct clades containing all  
1161 aphid or all *Oncopeltus* proteins (82% support each), and for each ‘core’ clade  
1162 comprised exclusively of proteins from each species (97% and 100%, respectively;  
1163 triangles shown to scale for branch length and number of clade members). Branch  
1164 length unit is substitutions per site.  
1165 Analyses based on OGS v1.1.

1166  
1167 **Fig. 5. Comparison of repeat content estimations.**

1168 (a) Comparison of total repetitive content among insect genomes. The three values  
1169 for *Oncopeltus* are shown (in ascending order: original Illumina assembly, gap-filled  
1170 assembly, Illumina-PacBio hybrid estimate). Values for the three hemipterans labeled  
1171 in red text are from RepeatModeler (gold bars for the pea aphid and bed bug; blue and  
1172 gold bars for *Oncopeltus*). All other values are from the respective genome papers,  
1173 including a second value corresponding to the published repeat content for the first  
1174 version of the aphid genome [5, 9, 112, 157-162]. Species abbreviations as in Fig. 4  
1175 (compare panels a and b), and additionally: *Nlug*, *Nilaparvata lugens*; *Lmig*, *Locusta*  
1176 *migratoria*; *Bmor*, *Bombyx mori*; *Aalb*, *Aedes albopictus*.  
1177 (b) Comparison of repetitive element categories between three hemipteran genomes,  
1178 based on results from RepeatModeler. Here we present assembly coverage as actual  
1179 sequence length (Mb) to emphasize the greater repeat content in *Oncopeltus* (based on  
1180 the gap-filled assembly: see also Supplemental Note 2.3).

1181  
1182 **Figure 6. Trends in gene structure show hemipteroid-specific tendencies.**

1183 (a) Trends in protein size, exon size, and exon number are shown for a highly  
1184 conserved set of genes encoding large proteins of diverse functional classes (“gold  
1185 standard”, curated gene set). Median values are plotted. Sample sizes are indicated  
1186 for each species, with 11 genes for which orthologs were evaluated in all species.  
1187 Where it was not possible to analyze all 30 genes for a given species, equal sampling  
1188 was done across the range of protein sizes of the complete dataset, based on the  
1189 *Cimex* ortholog sizes (1:1:1 sampling from big:medium:small subcategories of 10  
1190 genes each). See also Supplemental Note 6.3.  
1191 (b) Box plot representations of coding sequence exon size (aa) for two species from  
1192 each of three insect orders, based on datasets of unique coding sequence exons (one  
1193 isoform per gene) and excluding terminal exons <10 aa (as most of those exons may  
1194 rather be UTRs or a small placeholder N-terminal exon, as a byproduct of the Maker  
1195 gene annotation pipeline’s requirement to create nominally complete protein coding  
1196 genes with in-frame start codons). Only manually curated gene models were  
1197 considered for *Oncopeltus* and the other recent i5K species; the entire OGS was used

1198 for *Tribolium* and *Drosophila*. For clarity, outliers are omitted; whiskers represent  
1199 1.5× the value of the Q3 (upper) or Q2 (lower) quartile range. MAD, median absolute  
1200 deviation.  
1201 Species are represented by their four-letter taxonomic abbreviations, with their ordinal  
1202 relationships given below the phylogeny in panel (a): Hemip., Hemiptera; Thys.,  
1203 Thysanoptera; Col., Coleoptera; Dipt., Diptera. Species abbreviations as in Fig. 4 and  
1204 additionally: *Gbue*, *Gerris buenoi*; *Focc*, *Frankliniella occidentalis*; *Agla*,  
1205 *Anoplophora glabripennis*; *Ccap*, *Ceratitis capitata*.

1207 **Fig 7. Splice site evolution correlates with both lineage and, independently,**  
1208 **genome size.**

1209 Splice site changes are shown for *hemocytin* (blue text), *Tenascin major* (*Ten-m*,  
1210 turquoise text), and *UDP-galactose 4'-epimerase* (brown text), mapped onto a species  
1211 tree of eight insects. Patterns of splice site evolution were inferred based on the most  
1212 parsimonious changes that could generate the given pattern within a protein sequence  
1213 alignment of all orthologs (see also Supplemental Note 6.3 for complete methodology  
1214 and data sources). In instances where an equal number of lineage specific gains or  
1215 losses was possible, we remained agnostic and present a range for the ancestral  
1216 number of splice sites indicated at the base of the tree, where the bracketed number  
1217 indicates how many ancestral positions are still retained in all species. Along each  
1218 lineage, subsequent changes are indicated in brackets, with the sign indicating gains  
1219 (+) or losses (-). Values shown to the right are species-specific changes. Note that  
1220 the values shown between the *D. melanogaster* and *T. castaneum* lineages denote  
1221 changes that have occurred independently in both. Colored boxes highlight the  
1222 largest sources of change, as indicated in the legend and discussed in the main text.  
1223 Species are represented by their four-letter abbreviations (as defined in Fig. 6), and  
1224 the estimated genome sizes are indicated parenthetically (measured size: [11, 29, 73,  
1225 161, 163]; draft assembly size: GenBank Genome IDs 14741 and 17730). Divergence  
1226 times are shown in gray and given in millions of years [3]. Abbreviations as in Figs.  
1227 4, 6, and: Col., Coleoptera; Dipt., Diptera; Hemip., Hemiptera; Hemipt., hemipteroid  
1228 assemblage (including *F. occidentalis*); n.d., no data.

1230 **Fig. 8. Lateral gene transfer introduction and subsequent evolution within the**  
1231 **Hemiptera for mannosidase-encoding genes.**

1232 (a) Species tree summary of evolutionary events. Stars represent the original LGT  
1233 introduction and subsequent copy number gains (see legend).

1234 (b) Maximum likelihood phylogeny of mannosidase proteins, including bacterial  
1235 sequences identified among the best GenBank blastp hits for *Oncopeltus* and  
1236 *Halyomorpha* (accession numbers as indicated, and for “Other bacteria” are:  
1237 ACB22214.1, AEE17431.1, AEI12929.1, AEO43249.1, AFN74531.1, CDM56239.1,  
1238 CUA67033.1, KOE98396.1, KPI24888.1, OAN41395.1, ODP26899.1, ODS11151.1,  
1239 OON18663.1, PBD05534.1, SIR54690.1, WP096035621.1, YP001327394.1). All  
1240 nodes have ≥50% support from 500 bootstrap replicates [164]. Triangles are shown  
1241 to scale for branch length and number of clade members; branch length unit is  
1242 substitutions per site.

1243 (c) Manually curated protein sequence alignment for the N-terminal region, showing  
1244 the position of splice sites (“|” symbol), where one position is ancestral and present in  
1245 all paralogs of a given species (magenta), and one position occurs in a subset of  
1246 paralogs and is presumed to be younger (cyan, note the position is within the 5' UTR  
1247 in the case of *Halyomorpha*). Residues highlighted in yellow are conserved between

1248 the two species. The *Oncopeltus* paralog represented in the OGS as OFAS017153-  
1249 RA is marked with an asterisk to indicate that this version of the gene model is  
1250 incomplete and lacks the initial exon (gray text in the alignment). For clarity, only the  
1251 final three digits of the *Halyomorpha* GenBank accessions are shown (full accessions:  
1252 XP\_014289XXX).

1253

1254 **Fig. 9. Isoform-specific RNAi based on new genome annotations affects the**  
1255 **molting and cuticle identity gene *broad*.**

1256 (a) Genomic organization of the cuticle identity gene *broad*. The regions used as  
1257 template to generate isoform-specific dsRNA are indicated (red asterisks: the final,  
1258 unique exons of each isoform). Previous RNAi studies targeted sequence within  
1259 exons 1-5 that is shared among all isoforms (dashed red box, [94]).

1260 (b) Knock down of the *Oncopeltus* Z2 or Z3 *broad* isoforms at the onset of the  
1261 penultimate instar resulted in altered nymphal survival and morphogenesis that was  
1262 reflected in the size and proportion of the fore and hind wings at the adult stage  
1263 (upper and lower images, respectively, shown to the same scale for all wings). We  
1264 did not detect any effect on the wing phenotype when targeting the Z4-specific exon,  
1265 demonstrating the specificity of the zinc finger coding region targeted by RNAi.  
1266 Experimental statistics are provided in the figure inset, including for the buffer-  
1267 injected negative control.

1268

1269 **Fig. 10. Comparison of the urea cycle of *Oncopeltus* with 26 other insect species.**

1270 (a) Detailed diagram of the urea cycle (adapted from KEGG).

1271 (b) Group of 7 species, including *Oncopeltus*, for which Arg degradation via arginase  
1272 (3.5.3.1), but not synthesis, is possible.

1273 (c) Group of 3 species for which neither the degradation nor synthesis of arginine via  
1274 the urea cycle is possible (all 3 other hemipterans in this analysis).

1275 (d) Group of 17 species sharing a complete (or almost complete) urea cycle.

1276 Hemiptera are identified in red text and the milkweed-feeding monarch butterfly is in  
1277 blue text. Enzyme names corresponding to EC numbers: 1.5.1.2 = pyrroline-5-  
1278 carboxylate reductase; 1.14.13.39 = nitric-oxide synthase; 2.1.3.3 = ornithine  
1279 carbamoyltransferase; 2.6.1.13 = ornithine aminotransferase; 3.5.3.1 = arginase;  
1280 4.3.2.1 = argininosuccinate lyase; 6.3.4.5 = argininosuccinate synthase.

1281 Analyses based on OGS v1.1.

1282

1283

1284 **TABLES (see above within relevant manuscript sections)**

1285

1286 **Table 1. *Oncopeltus fasciatus* genome metrics.**

1287

1288 **Table 2. Numbers of chemoreceptor genes/proteins per family in selected insect**  
1289 **species.**

1290

1291 **Table 3. Hemipteran ArthropodaCyc database summaries.**

1292

1293 **Table 4. Hemipteran ArthropodaCyc annotations of metabolic genes.**

1294

1295 **DECLARATIONS**

1296

1297 **ADDITIONAL FILES**

1298 Additional file 1: Supplementary figures, tables, methods, and other text. (PDF)

1299 Additional file 2: Large supporting tables. (XLSX)

1300 Additional file 3: Chemoreceptor sequences in FASTA format. (TXT)

1301

1302 **ACKNOWLEDGEMENTS**

1303 We thank Dorith Rotenberg (Kansas State University, currently North Carolina State  
1304 University, USA), Abderrahman Khila on behalf of the Water Strider Genome  
1305 Consortium (Institute of Functional Genomics and École Normale Supérieure de  
1306 Lyon, France), and Michael Sparks (Agricultural Research Service, United States  
1307 Department of Agriculture, USA) for generously making available the unpublished  
1308 genome assemblies of the fellow hemipteroid i5K species *Frankliniella occidentalis*,  
1309 *Gerris buenoi*, and *Halyomorpha halys*, respectively, for use in specific analyses  
1310 presented here. Similarly, we thank Hans Kelstrup and Lynn Riddiford (Janelia Farm  
1311 Research Campus, HHMI, USA) for sharing unpublished data on *Of-E75A* RNAi.  
1312 We thank George Coupland (Max Planck Institute for Plant Breeding Research,  
1313 Cologne, Germany) as well as Lisa Czaja, Kurt Steuber, and Bruno Huettel (Max  
1314 Planck Genome Centre Cologne, Germany) for conducting the PacBio sequencing  
1315 and providing support with data handling. We also thank Oliver Niehuis (Albert  
1316 Ludwig University, Freiburg, Germany) and Alexander Klassmann (University of  
1317 Cologne, Germany) for discussions on *k*-mer and gene structure analyses,  
1318 respectively, Sarah Kingan (University of Rochester, USA) for assistance with LGT  
1319 phylogenies, as well as Jeanne Wilbrandt (Zoologisches Forschungsmuseum  
1320 Alexander Koenig, Bonn, Germany) for comments on the manuscript.

1321

1322 **FUNDING**

1323 Funding for genome sequencing, assembly and automated annotation was provided by  
1324 the National Institutes of Health (NIH) grant U54 HG003273 (NHGRI) to RAG. The  
1325 i5K pilot project (<https://www.hgsc.bcm.edu/arthropods>) assisted in sequencing of the  
1326 *Oncopeltus fasciatus* genome. We also acknowledge funding for the project from  
1327 German Research Foundation (DFG) grants PA 2044/1-1 and SFB 680 project A12 to  
1328 KAP. Support for specific analyses was provided by the Swiss National Science  
1329 Foundation with grant 31003A\_143936 to EMZ and PP00P3\_170664 to RMW; the  
1330 European Research Council grant ERC-CoG #616346 to AK; DFG grant SFB 680  
1331 project A1 to SiR; the National Science Foundation with grant US NSF DEB1257053  
1332 to JHW; and by NIH grants 5R01GM080203 (NIGMS) and 5R01HG004483  
1333 (NHGRI) and by the Director, Office of Science, Office of Basic Energy Sciences,  
1334 U.S. Department of Energy, Contract No. DE-AC02-05CH11231 to MCMT.

1335

1336 **AVAILABILITY OF DATA AND MATERIALS**

1337 All sequence data are publically available at the NCBI, bioproject number  
1338 PRJNA229125. In addition, gene models and a browser are available at the National  
1339 Agricultural Library ([132-134], [https://i5k.nal.usda.gov/Oncopeltus\\_fasciatus](https://i5k.nal.usda.gov/Oncopeltus_fasciatus)).

1340

1341 **AUTHOR'S CONTRIBUTIONS**

1342 KAP and StR conceived, managed, and coordinated the project. KAP and SK  
1343 provided specimens for sequencing and performed DNA and RNA extractions. StR,  
1344 SD, SLL, HC, HVD, HD, YH, JQ, SCM, DSTH, KCW, DMM, and RAG constructed

1345 libraries and performed sequencing. StR, SCM, and DSTH performed the genome  
1346 assembly and automated gene prediction. IMVJ, JSJ, and PJM analyzed genome size.  
1347 IMVJ, VK, PH, and KAP contributed to repetitive content analyses. AD, RR, JHW,  
1348 KAP, and SK performed bacterial scaffold detection and LGT analyses. MCMT  
1349 developed Apollo software. KAP, IMVJ, MCMT, CPC, C-YL, and MFP  
1350 implemented Apollo-based manual curation. KAP, IMVJ, JBB, DE, YS, HMR, DA,  
1351 CGCJ, BMIV, EJD, CSB, C-CC, Y-TC, ADC, AGC, AJJC, PKD, EMD, CGE, MF,  
1352 NG, TH, Y-MH, ECJ, TEJ, JWJ, AK, ML, MRL, H-LL, YL, SRP, LP, MP, PNR,  
1353 RRP, SiR, LS, MES, JS, ES, JNS, OT, LT, MVDZ, SV, and AJR participated in  
1354 manual curation and contributed to the Supplemental Notes. IMVJ, KAP, DSTH, M-  
1355 JMC, CPC, C-YL, and MFP performed curation quality control and generated the  
1356 OGS. IMVJ, KAP, and JBB generated *de novo* transcriptomes and performed life  
1357 history stage expression analyses. RMW, PI, KAP, and EMZ performed orthology  
1358 and phylogenomic analyses. MTW, KAP, IMVJ, PH, and BMIV performed  
1359 transcription factor analyses. EJD conducted analyses of DNA methylation. KAP,  
1360 PH, and RJS contributed to comparative analyses of gene structure. DE conducted  
1361 the RNAi experiments. SC, PB-P, GF, and NP generated and performed comparative  
1362 analyses on the OncfaCyc database. KAP, IMVJ, JBB, DE, YS, SC, HMR, and  
1363 MTW wrote the manuscript. KAP, IMVJ, JBB, DE, YS, SC, HMR, MFP, RMW, PI,  
1364 MTW, StR, PJM, and AK edited the manuscript. IMVJ and KAP organized the  
1365 Supplementary Materials. All authors approved the final manuscript.  
1366

#### 1367 **COMPETING INTERESTS**

1368 The authors declare that they have no competing interests.  
1369

#### 1370 **ETHICS APPROVAL AND CONSENT TO PARTICIPATE**

1371 Not applicable.  
1372

#### 1373 **AUTHOR DETAILS**

1374 <sup>1</sup> Institute for Zoology: Developmental Biology, University of Cologne, Zùlpicher Str. 47b, 50674  
1375 Cologne, Germany

1376 <sup>2</sup> School of Life Sciences, University of Warwick, Gibbet Hill Campus, Coventry CV4 7AL, UK

1377 <sup>3</sup> Department of Biological Sciences, University of Cincinnati, Cincinnati, Ohio 45221, USA

1378 <sup>4</sup> Department of Biochemistry and Cell Biology and Center for Developmental Genetics, Stony  
1379 Brook University, Stony Brook, New York 11794, USA

1380 <sup>5</sup> Department of Biological Sciences, Wellesley College, 106 Central St., Wellesley,  
1381 Massachusetts 02481, USA

1382 <sup>6</sup> Univ Lyon, INSA-Lyon, INRA, BF2I, UMR0203, F-69621, Villeurbanne, France

1383 <sup>7</sup> Current address: LSTM, Laboratoire des Symbioses Tropicales et Méditerranéennes, INRA,  
1384 IRD, CIRAD, SupAgro, University of Montpellier, Montpellier, France

1385 <sup>8</sup> Department of Entomology, University of Illinois at Urbana-Champaign, Urbana, Illinois 61801,  
1386 USA

1387 <sup>9</sup> National Agricultural Library, Beltsville, Maryland 20705, USA

1388 <sup>10</sup> Department of Genetic Medicine and Development and Swiss Institute of Bioinformatics,  
1389 University of Geneva, Geneva 1211, Switzerland

1390 <sup>11</sup> Current address: Department of Ecology and Evolution, University of Lausanne, Lausanne  
1391 1015, Switzerland

1392 <sup>12</sup> Center for Autoimmune Genomics and Etiology, Division of Biomedical Informatics, and  
1393 Division of Developmental Biology, Cincinnati Children's Hospital Medical Center, Department  
1394 of Pediatrics, College of Medicine, University of Cincinnati, Cincinnati, Ohio 45229, USA

1395 <sup>13</sup> Human Genome Sequencing Center, Department of Human and Molecular Genetics, Baylor  
1396 College of Medicine, One Baylor Plaza, Houston, Texas 77030, USA

- 1397 <sup>14</sup> Current address: Department of Genome Sciences, University of Washington School of  
1398 Medicine, Seattle, Washington 98195, USA
- 1399 <sup>15</sup> Current address: Howard Hughes Medical Institute, University of Washington, Seattle,  
1400 Washington 98195, USA
- 1401 <sup>16</sup> Department of Biology, University of Rochester, Rochester, New York 14627, USA
- 1402 <sup>17</sup> Institute of Biology, Leiden University, Sylviusweg 72, 2333 BE Leiden, Netherlands
- 1403 <sup>18</sup> Max Planck Institute for Chemical Ecology, Hans-Knöll Strasse 8, 07745 Jena, Germany
- 1404 <sup>19</sup> Department of Biochemistry and Genomics Aotearoa, University of Otago, Dunedin 9054, New  
1405 Zealand
- 1406 <sup>20</sup> School of Biology, Faculty of Biological Sciences, University of Leeds, Leeds LS2 9JT, UK
- 1407 <sup>21</sup> Institut de Génomique Fonctionnelle de Lyon, Université de Lyon, Université Claude Bernard  
1408 Lyon 1, CNRS UMR 5242, École Normale Supérieure de Lyon, 46 Allée d'Italie, 69364 Lyon,  
1409 France
- 1410 <sup>22</sup> Department of Ecology, Evolution and Behavior, The Alexander Silberman Institute of Life  
1411 Sciences, The Hebrew University of Jerusalem, Edmond J. Safra Campus, Givat Ram 91904,  
1412 Jerusalem, Israel
- 1413 <sup>23</sup> Department of Entomology/Institute of Biotechnology, College of Bioresources and  
1414 Agriculture, National Taiwan University, Taipei, Taiwan
- 1415 <sup>24</sup> Current address: School of Life Sciences, Rochester Institute of Technology, Rochester, New  
1416 York 14623, USA
- 1417 <sup>25</sup> Department of Organismic and Evolutionary Biology, Harvard University, 26 Oxford Street,  
1418 Cambridge, Massachusetts 02138, USA
- 1419 <sup>26</sup> Department of Molecular and Cellular Biology, Harvard University, 26 Oxford Street,  
1420 Cambridge, Massachusetts 02138, USA
- 1421 <sup>27</sup> Department of Biological Sciences, Wayne State University, Detroit, Michigan 48202, USA
- 1422 <sup>28</sup> Institute for Genetics, University of Cologne, Zùlpicher Straße 47a, 50674 Cologne, Germany
- 1423 <sup>29</sup> Department of Entomology, Texas A&M University, College Station, Texas 77843, USA
- 1424 <sup>30</sup> CECAD, University of Cologne, Cologne, Germany
- 1425 <sup>31</sup> Department of Entomology and Program in Molecular & Cell Biology, University of Maryland,  
1426 College Park, Maryland 20742, USA
- 1427 <sup>32</sup> Department of Entomology, University of Georgia, 120 Cedar St., Athens, Georgia 30602, USA
- 1428 <sup>33</sup> Environmental Genomics and Systems Biology Division, Lawrence Berkeley National  
1429 Laboratory, Berkeley, California, USA
- 1430 <sup>34</sup> Department of Entomology, College of Agriculture, Food and Environment, University of  
1431 Kentucky, Lexington, Kentucky 40546, USA
- 1432 <sup>35</sup> Department of Biology, University of Hawai'i at Mānoa, Honolulu, Hawaii 96822, USA
- 1433 <sup>36</sup> Current address: Department of Evolutionary Genetics, Max-Planck-Institut für  
1434 Evolutionsbiologie, August-Thienemann-Straße 2, 24306 Plön, Germany
- 1435 <sup>37</sup> Current address: Earthworks Institute, 185 Caroline Street, Rochester, New York 14620, USA
- 1436 <sup>38</sup> Centro de Bioinvestigaciones, Universidad Nacional del Noroeste de Buenos Aires, Argentina
- 1437 <sup>39</sup> Current address: Department of Biotechnology, Central university of Rajasthan (CURAJ), NH-  
1438 8, Bandarsindri, Ajmer- 305801, India
- 1439 <sup>40</sup> Argelander-Institut für Astronomie, Universität Bonn, Auf dem Hügel 71, 53121 Bonn,  
1440 Germany
- 1441 <sup>41</sup> Current address: Department of Zoology, University of Cambridge, Cambridge CB2 3DT, UK
- 1442 <sup>42</sup> Centro Regional de Estudios Genómicos, Facultad de Ciencias Exactas, Universidad Nacional  
1443 de La Plata, La Plata, Argentina
- 1444
- 1445
- 1446

1447 **REFERENCES**

1448

- 1449 1. Zdobnov EM, Tegenfeldt F, Kuznetsov D, Waterhouse RM, Simão FA, Ioannidis P,  
1450 Seppey M, Loetscher A, Kriventseva EV: **OrthoDB v9.1: cataloging evolutionary and**  
1451 **functional annotations for animal, fungal, plant, archaeal, bacterial and viral**  
1452 **orthologs.** *Nucleic Acids Res* 2017, **45**:D744-D749.
- 1453 2. Huang DY, Bechly G, Nel P, Engel MS, Prokop J, Azar D, Cai CY, van de Kamp T,  
1454 Staniczek AH, Garrouste R, et al: **New fossil insect order Permopsocida elucidates**  
1455 **major radiation and evolution of suction feeding in hemimetabolous insects**  
1456 **(Hexapoda: Acercaria).** *Sci Rep* 2016, **6**:23004.
- 1457 3. Misof B, Liu S, Meusemann K, Peters RS, Donath A, Mayer C, Frandsen PB, Ware J,  
1458 Flouri T, Beutel RG, et al: **Phylogenomics resolves the timing and pattern of insect**  
1459 **evolution.** *Science* 2014, **346**:763-767.
- 1460 4. Grimaldi D, Engel MS: *Evolution of the Insects*. Cambridge: Cambridge University Press;  
1461 2005.
- 1462 5. The International Aphid Genomics Consortium: **Genome sequence of the pea aphid**  
1463 ***Acyrtosiphon pisum*** *PLoS Biol* 2010, **8**:e1000313.
- 1464 6. Mathers TC, Chen Y, Kaithakottil G, Legeai F, Mugford ST, Baa-Puyoulet P, Bretaudeau  
1465 A, Clavijo B, Colella S, Collin O, et al: **Rapid transcriptional plasticity of duplicated**  
1466 **gene clusters enables a clonally reproducing aphid to colonise diverse plant species.**  
1467 *Genome Biol* 2017, **18**:27.
- 1468 7. Wenger JA, Cassone BJ, Legeai F, Johnston JS, Bansal R, Yates AD, Coates BS,  
1469 Pavinato VA, Michel A: **Whole genome sequence of the soybean aphid, *Aphis***  
1470 ***glycines*.** *Insect Biochem Mol Biol* 2017.
- 1471 8. Sloan DB, Nakabachi A, Richards S, Qu J, Murali SC, Gibbs RA, Moran NA: **Parallel**  
1472 **histories of horizontal gene transfer facilitated extreme reduction of endosymbiont**  
1473 **genomes in sap-feeding insects.** *Mol Biol Evol* 2014, **31**:857-871.
- 1474 9. Xue J, Zhou X, Zhang C-X, Yu L-L, Fan H-W, Wang Z, Xu H-J, Xi Y, Zhu Z-R, Zhou  
1475 W-W, et al: **Genomes of the rice pest brown planthopper and its endosymbionts**  
1476 **reveal complex complementary contributions for host adaptation.** *Genome Biol* 2014,  
1477 **15**:521.
- 1478 10. Mesquita RD, Vionette-Amaral RJ, Lowenberger C, Rivera-Pomar R, Monteiro FA,  
1479 Minx P, Spieth J, Carvalho AB, Panzera F, Lawson D, et al: **Genome of *Rhodnius***  
1480 ***prolixus*, an insect vector of Chagas disease, reveals unique adaptations to**  
1481 **hematophagy and parasite infection.** *Proc Natl Acad Sci USA* 2015, **112**:14936-14941.
- 1482 11. Benoit JB, Adelman ZN, Reinhardt K, Dolan A, Poelchau M, Jennings EC, Szuter EM,  
1483 Hagan RW, Gujar H, Shukla JN, et al: **Unique features of a global human ectoparasite**  
1484 **identified through sequencing of the bed bug genome.** *Nat Commun* 2016, **7**:10165.
- 1485 12. Rosenfeld JA, Reeves D, Brugler MR, Narechania A, Simon S, Durrett R, Fook J,  
1486 Shianna K, Schatz MC, Gandara J, et al: **Genome assembly and geospatial**  
1487 **phylogenomics of the bed bug *Cimex lectularius*.** *Nat Commun* 2016, **7**:10164.
- 1488 13. Sparks ME, Shelby KS, Kuhar D, Gundersen-Rindal DE: **Transcriptome of the invasive**  
1489 **brown marmorated stink bug, *Halyomorpha halys* (Stal) (Heteroptera:**  
1490 **Pentatomidae).** *PLoS One* 2014, **9**:e111646.
- 1491 14. Ioannidis P, Lu Y, Kumar N, Creasy T, Daugherty S, Chibucos MC, Orvis J, Shetty A,  
1492 Ott S, Flowers M, et al: **Rapid transcriptome sequencing of an invasive pest, the**  
1493 **brown marmorated stink bug, *Halyomorpha halys*.** *BMC Genomics* 2014, **15**:738.
- 1494 15. Wilson ACC, Ashton PD, Charles H, Colella S, Febvay G, Jander G, Kushlan PF,  
1495 Macdonald SJ, Schwartz JF, Thomas GH, Douglas AE: **Genomic insight into the amino**  
1496 **acid relations of the pea aphid, *Acyrtosiphon pisum*, with its symbiotic bacterium**  
1497 ***Buchnera aphidicola*.** *Insect Molecular Biology* 2010, **19 Suppl 2**:249-258.
- 1498 16. Li H, Leavengood JM, Jr., Chapman EG, Burkhardt D, Song F, Jiang P, Liu J, Zhou X,  
1499 Cai W: **Mitochondrial phylogenomics of Hemiptera reveals adaptive innovations**  
1500 **driving the diversification of true bugs.** *Proc Biol Sci* 2017, **284**.
- 1501 17. Eichler S, Schaub GA: **Development of symbionts in triatomine bugs and the effects**  
1502 **of infections with trypanosomatids.** *Exp Parasitol* 2002, **100**:17-27.



- 1503 18. Matsuura Y, Kikuchi Y, Hosokawa T, Koga R, Meng X-Y, Kamagata Y, Nikoh N,  
1504 Fukatsu T: **Evolution of symbiotic organs and endosymbionts in lygaeid stinkbugs.**  
1505 *The ISME Journal* 2012, **6**:397–409.
- 1506 19. Berenbaum MR, Miliczky E: **Mantids and milkweed bugs - efficacy of aposematic**  
1507 **coloration against invertebrate predators.** *American Midland Naturalist* 1984, **111**:64-  
1508 68.
- 1509 20. Burdfield-Steel ER, Shuker DM: **The evolutionary ecology of the Lygaeidae.** *Ecol Evol*  
1510 2014, **4**:2278-2301.
- 1511 21. Lawrence PA: **Mitosis and the cell cycle in the metamorphic moult of the milkweed**  
1512 **bug *Oncopeltus fasciatus*; a radioautographic study.** *J Cell Sci* 1968, **3**:391-404.
- 1513 22. Chipman AD: ***Oncopeltus fasciatus* as an evo-devo research organism.** *Genesis* 2017,  
1514 **55**.
- 1515 23. Panfilio KA: **Late extraembryonic development and its *zen-RNAi*-induced failure in**  
1516 **the milkweed bug *Oncopeltus fasciatus*.** *Dev Biol* 2009, **333**:297-311.
- 1517 24. Panfilio KA, Roth S: **Epithelial reorganization events during late extraembryonic**  
1518 **development in a hemimetabolous insect.** *Dev Biol* 2010, **340**:100-115.
- 1519 25. Sharma AI, Yanes KO, Jin L, Garvey SL, Taha SM, Suzuki Y: **The phenotypic**  
1520 **plasticity of developmental modules.** *Evodevo* 2016, **7**:15.
- 1521 26. Hughes CL, Kaufman TC: **RNAi analysis of *Deformed*, *proboscipedia* and *Sex combs***  
1522 **reduced in the milkweed bug *Oncopeltus fasciatus*: novel roles for Hox genes in the**  
1523 **hemipteran head.** *Development* 2000, **127**:3683-3694.
- 1524 27. Wolfe SL, John B: **The organization and ultrastructure of male meiotic chromosomes**  
1525 **in *Oncopeltus fasciatus*.** *Chromosoma* 1965, **17**:85-103.
- 1526 28. Messthaler H, Traut W: **Phases of Sex Chromosome Inactivation in *Oncopeltus***  
1527 ***fasciatus* and *Pyrrhocoris apterus* (Insecta, Heteroptera).** *Caryologia* 1975, **28**:501-  
1528 510.
- 1529 29. McKenna DD, Scully ED, Pauchet Y, Hoover K, Kirsch R, Geib SM, Mitchell RF,  
1530 Waterhouse RM, Ahn SJ, Arsala D, et al: **Genome of the Asian longhorned beetle**  
1531 **(*Anoplophora glabripennis*), a globally significant invasive species, reveals key**  
1532 **functional and evolutionary innovations at the beetle-plant interface.** *Genome Biol*  
1533 2016, **17**:227.
- 1534 30. Simpson JT: **Exploring genome characteristics and sequence quality without a**  
1535 **reference.** *Bioinformatics* 2014, **30**:1228-1235.
- 1536 31. Hughes CL, Kaufman TC: **RNAi analysis of *Deformed*, *proboscipedia* and *Sex combs***  
1537 **reduced in the milkweed bug *Oncopeltus fasciatus*: novel roles for Hox genes in the**  
1538 **Hemipteran head.** *Development* 2000, **127**:3683-3694.
- 1539 32. Panfilio KA, Liu PZ, Akam M, Kaufman TC: ***Oncopeltus fasciatus zen* is essential for**  
1540 **serosal tissue function in katatrepsis.** *Dev Biol* 2006, **292**:226-243.
- 1541 33. Tian X, Xie Q, Li M, Gao C, Cui Y, Xi L, Bu W: **Phylogeny of pentatomomorphan**  
1542 **bugs (Hemiptera-Heteroptera:Pentatomomorpha) based on six Hox gene fragments.**  
1543 *Zootaxa* 2011, **2888**:57-68.
- 1544 34. Ewen-Campen B, Shaner N, Panfilio KA, Suzuki Y, Roth S, Extavour CG: **The**  
1545 **maternal and early embryonic transcriptome of the milkweed bug *Oncopeltus***  
1546 ***fasciatus*.** *BMC Genomics* 2011, **12**:61.
- 1547 35. Zhen Y, Aardema ML, Medina EM, Schumer M, Andolfatto P: **Parallel molecular**  
1548 **evolution in an herbivore community.** *Science* 2012, **337**:1634-1637.
- 1549 36. Robertson HM: **The insect chemoreceptor superfamily in *Drosophila pseudoobscura*:**  
1550 **Molecular evolution of ecologically-relevant genes over 25 million years** *J Insect Sci*  
1551 2009, **9**:18.
- 1552 37. Robertson HM: **Taste: Independent origins of chemoreception coding systems?** *Curr*  
1553 *Biol* 2001, **11**:R560-R562.
- 1554 38. Jazwinska A, Rushlow C, Roth S: **The role of *brinker* in mediating the graded**  
1555 **response to Dpp in early *Drosophila* embryos.** *Development* 1999, **126**:3323-3334.
- 1556 39. Ewer J, Truman JW: **Increases in cyclic 3',5'-guanosine monophosphate (cGMP)**  
1557 **occur at ecdysis in an evolutionarily conserved crustacean cardioactive peptide-**  
1558 **immunoreactive insect neuronal network.** *Journal of Comparative Neurology* 1996,  
1559 **370**:330-341.

- 1560 40. Togawa T, Dunn WA, Emmons AC, Nagao J, Willis JH: **Developmental expression**  
1561 **patterns of cuticular protein genes with the R&R Consensus from *Anopheles***  
1562 ***gambiae*. *Insect Biochem Mol Biol* 2008, **38**:508-519.**
- 1563 41. Simão FA, Waterhouse RM, Ioannidis P, Kriventseva EV, Zdobnov EM: **BUSCO:**  
1564 **assessing genome assembly and annotation completeness with single-copy orthologs.**  
1565 *Bioinformatics* 2015, **31**:3210-3212.
- 1566 42. Kriventseva EV, Tegenfeldt F, Petty TJ, Waterhouse RM, Simão FA, Pozdnyakov IA,  
1567 Ioannidis P, Zdobnov EM: **OrthoDB v8: update of the hierarchical catalog of**  
1568 **orthologs and the underlying free software. *Nucl Acids Res* 2015, **43**:D250-D256.**
- 1569 43. Shigenobu S, Bickel RD, Brisson JA, Butts T, Chang CC, Christiaens O, Davis GK,  
1570 Duncan EJ, Ferrier DE, Iga M, et al: **Comprehensive survey of developmental genes in**  
1571 **the pea aphid, *Acyrtosiphon pisum*: frequent lineage-specific duplications and losses**  
1572 **of developmental genes. *Insect Mol Biol* 2010, **19 Suppl 2**:47-62.**
- 1573 44. Bansal R, Michel AP: **Core RNAi Machinery and *Sid1*, a component for systemic**  
1574 **RNAi, in the hemipteran insect, *Aphis glycines*. *Int J Mol Sci* 2013, **14**:3786-3801.**
- 1575 45. Bao R, Fischer T, Bolognesi R, Brown SJ, Friedrich M: **Parallel duplication and partial**  
1576 **subfunctionalization of beta-catenin/armadillo during insect evolution. *Mol Biol Evol***  
1577 **2012, **29**:647-662.**
- 1578 46. Sachs L, Chen YT, Drechsler A, Lynch JA, Panfilio KA, Lassig M, Berg J, Roth S:  
1579 **Dynamic BMP signaling polarized by Toll patterns the dorsoventral axis in a**  
1580 **hemimetabolous insect. *eLife* 2015, **4**:e05502.**
- 1581 47. Konopova B, Smykal V, Jindra M: **Common and distinct roles of juvenile hormone**  
1582 **signaling genes in metamorphosis of holometabolous and hemimetabolous insects.**  
1583 *PLoS One* 2011, **6**:e28728.
- 1584 48. Armisen D, Refki PN, Crumiere AJ, Viala S, Toubiana W, Khila A: **Predator strike**  
1585 **shapes antipredator phenotype through new genetic interactions in water striders.**  
1586 *Nat Commun* 2015, **6**:8153.
- 1587 49. Wulff JP, Sierra I, Sterkel M, Holtorf M, Van Wielendaele P, Francini F, Broeck JV, Ons  
1588 S: **Orcokinin neuropeptides regulate ecdysis in the hemimetabolous insect *Rhodnius***  
1589 ***prolixus*. *Insect Biochem Mol Biol* 2017, **81**:91-102.**
- 1590 50. Vellichirammal NN, Gupta P, Hall TA, Brisson JA: **Ecdysone signaling underlies the**  
1591 **pea aphid transgenerational wing polyphenism. *Proc Natl Acad Sci U S A* 2017,**  
1592 ****114**:1419-1423.**
- 1593 51. Chiu TL, Wen Z, Rupasinghe SG, Schuler MA: **Comparative molecular modeling of**  
1594 ***Anopheles gambiae* CYP6Z1, a mosquito P450 capable of metabolizing DDT. *Proc***  
1595 ***Natl Acad Sci U S A* 2008, **105**:8855-8860.**
- 1596 52. Gong Y, Li T, Feng Y, Liu N: **The function of two P450s, CYP9M10 and CYP6AA7,**  
1597 **in the permethrin resistance of *Culex quinquefasciatus*. *Sci Rep* 2017, **7**:587.**
- 1598 53. Liu PZ, Kaufman TC: ***hunchback* is required for suppression of abdominal identity,**  
1599 **and for proper germband growth and segmentation in the intermediate germband**  
1600 **insect *Oncopeltus fasciatus*. *Development* 2004, **131**:1515-1527.**
- 1601 54. Schaeper ND, Pechmann M, Damen WGM, Prpic N-M, Wimmer EA: **Evolutionary**  
1602 **plasticity of *collier* function in head development of diverse arthropods. *Dev Biol***  
1603 **2010, **344**:363-376.**
- 1604 55. Aspiras AC, Smith FW, Angelini DR: **Sex-specific gene interactions in the patterning**  
1605 **of insect genitalia. *Dev Biol* 2011, **360**:369-380.**
- 1606 56. Weirauch MT, Yang A, Albu M, Cote AG, Montenegro-Montero A, Drewe P, Najafabadi  
1607 HS, Lambert SA, Mann I, Cook K, et al: **Determination and inference of eukaryotic**  
1608 **transcription factor sequence specificity. *Cell* 2014, **158**:1431-1443.**
- 1609 57. Peel AD, Telford MJ, Akam M: **The evolution of hexapod engrailed-family genes:**  
1610 **evidence for conservation and concerted evolution. *Proc Biol Sci* 2006, **273**:1733-**  
1611 **1742.**
- 1612 58. Ben-David J, Chipman AD: **Mutual regulatory interactions of the trunk gap genes**  
1613 **during blastoderm patterning in the hemipteran *Oncopeltus fasciatus*. *Dev Biol* 2010,**  
1614 ****346**:140-149.**

- 1615 59. Erezilmaz DF, Kelstrup HC, Riddiford LM: **The nuclear receptor E75A has a novel**  
1616 **pair-rule-like function in patterning the milkweed bug, *Oncopeltus fasciatus*.** *Dev*  
1617 *Biol* 2009, **334**:300-310.
- 1618 60. Liu PZ, Kaufman TC: ***even-skipped* is not a pair-rule gene but has segmental and gap-**  
1619 **like functions in *Oncopeltus fasciatus*, an intermediate germband insect.** *Development*  
1620 2005, **132**:2081-2092.
- 1621 61. Weisbrod A, Cohen M, Chipman AD: **Evolution of the insect terminal patterning**  
1622 **system--insights from the milkweed bug, *Oncopeltus fasciatus*.** *Dev Biol* 2013,  
1623 **380**:125-131.
- 1624 62. Albertin CB, Simakov O, Mitros T, Wang ZY, Pungor JR, Edsinger-Gonzales E, Brenner  
1625 S, Ragsdale CW, Rokhsar DS: **The octopus genome and the evolution of cephalopod**  
1626 **neural and morphological novelties.** *Nature* 2015, **524**:220-224.
- 1627 63. Crooks GE, Hon G, Chandonia J-M, Brenner SE: **WebLogo: A sequence logo**  
1628 **generator.** *Genome Res* 2004, **14**:1188-1190.
- 1629 64. Najafabadi HS, Mnaimneh S, Schmitges FW, Garton M, Lam KN, Yang A, Albu M,  
1630 Weirauch MT, Radovani E, Kim PM, et al: **C2H2 zinc finger proteins greatly expand**  
1631 **the human regulatory lexicon.** *Nat Biotechnol* 2015, **33**:555-562.
- 1632 65. Emerson RO, Thomas JH: **Adaptive evolution in zinc finger transcription factors.**  
1633 *PLoS Genet* 2009, **5**:e1000325.
- 1634 66. Thomas JH, Schneider S: **Coevolution of retroelements and tandem zinc finger genes.**  
1635 *Genome Res* 2011, **21**:1800-1812.
- 1636 67. Garcia-Perez JL, Widmann TJ, Adams IR: **The impact of transposable elements on**  
1637 **mammalian development.** *Development* 2016, **143**:4101-4114.
- 1638 68. Liu PZ, Kaufman TC: ***Krüppel* is a gap gene in the intermediate insect *Oncopeltus***  
1639 ***fasciatus* and is required for development of both blastoderm and germband-derived**  
1640 **segments.** *Development* 2004, **131**:4567-4579.
- 1641 69. Heger P, Marin B, Bartkuhn M, Schierenberg E, Wiehe T: **The chromatin insulator**  
1642 **CTCF and the emergence of metazoan diversity.** *Proc Natl Acad Sci USA* 2012,  
1643 **109**:17507-17512.
- 1644 70. Liu H, Chang L-H, Sun Y, Lu X, Stubbs L: **Deep vertebrate roots for mammalian zinc**  
1645 **finger transcription factor subfamilies.** *Genome Biol Evol* 2014, **6**:510-525.
- 1646 71. Imbeault M, Hellebois P-Y, Trono D: **KRAB zinc-finger proteins contribute to the**  
1647 **evolution of gene regulatory networks.** *Nature* 2017, **543**:550-554.
- 1648 72. Csuros M, Rogozin IB, Koonin EV: **A detailed history of intron-rich eukaryotic**  
1649 **ancestors inferred from a global survey of 100 complete genomes.** *PLoS Comput Biol*  
1650 2011, **7**:e1002150.
- 1651 73. Papanicolaou A, Schetelig MF, Arensburger P, Atkinson PW, Benoit JB, Bourtzis K,  
1652 Castañera P, Cavanaugh JP, Chao H, Childers C, et al: **The whole genome sequence of**  
1653 **the Mediterranean fruit fly, *Ceratitidis capitata* (Wiedemann), reveals insights into the**  
1654 **biology and adaptive evolution of a highly invasive pest species.** *Genome Biol* 2016,  
1655 **17**:192.
- 1656 74. Hoy MA, Waterhouse RM, Wu K, Estep AS, Ioannidis P, Palmer WJ, Pomerantz AF,  
1657 Simao FA, Thomas J, Jiggins FM, et al: **Genome sequencing of the phytoseiid**  
1658 **predatory mite *Metaseiulus occidentalis* reveals completely atomized Hox genes and**  
1659 **superdynamic intron evolution.** *Genome Biol Evol* 2016, **8**:1762-1775.
- 1660 75. Seibt KM, Wenke T, Muders K, Truberg B, Schmidt T: **Short interspersed nuclear**  
1661 **elements (SINEs) are abundant in Solanaceae and have a family-specific impact on**  
1662 **gene structure and genome organization.** *Plant J* 2016, **86**:268-285.
- 1663 76. Huff JT, Zilberman D, Roy SW: **Mechanism for DNA transposons to generate introns**  
1664 **on genomic scales.** *Nature* 2016, **538**:533-536.
- 1665 77. Wheeler D, Redding AJ, Werren JH: **Characterization of an ancient lepidopteran**  
1666 **lateral gene transfer.** *PLoS One* 2012, **8**:e59262.
- 1667 78. Da Lage JL, Binder M, Hua-Van A, Janecek S, Casane D: **Gene make-up: rapid and**  
1668 **massive intron gains after horizontal transfer of a bacterial alpha-amylase gene to**  
1669 **Basidiomycetes.** *BMC Evol Biol* 2013, **13**:40.

- 1670 79. Lee DH, Short BD, Joseph SV, Bergh JC, Leskey TC: **Review of the biology, ecology,**  
1671 **and management of *Halyomorpha halys* (Hemiptera: Pentatomidae) in China,**  
1672 **Japan, and the Republic of Korea.** *Environ Entomol* 2013, **42**:627-641.
- 1673 80. Lawrence PA: **Cellular differentiation and pattern formation during metamorphosis**  
1674 **of the milkweed bug *Oncopeltus*.** *Dev Biol* 1969, **19**:12-40.
- 1675 81. Riddiford LM: **Prevention of Metamorphosis by Exposure of Insect Eggs to Juvenile**  
1676 **Hormone Analogs.** *Science* 1970, **167**:287-&.
- 1677 82. Willis JH, Lawrence PA: **Deferred Action of Juvenile Hormone.** *Nature* 1970, **225**:81-  
1678 83.
- 1679 83. Masner P, Bowers WS, Kalin M, Muhle T: **Effect of precocene II on the endocrine**  
1680 **regulation of development and reproduction in the bug, *Oncopeltus fasciatus*.** *Gen*  
1681 *Comp Endocrinol* 1979, **37**:156-166.
- 1682 84. Rewitz K, O'Connor M, Gilbert L: **Molecular evolution of the insect Halloween family**  
1683 **of cytochrome P450s: phylogeny, gene organization and functional conservation.**  
1684 *Insect Biochem Mol Biol* 2007, **37**:741-753.
- 1685 85. Huet F, Ruiz C, Richards G: **Sequential gene activation by ecdysone in *Drosophila***  
1686 **melanogaster: the hierarchical equivalence of early and early late genes.**  
1687 *Development* 1995, **121**:1195-1204.
- 1688 86. Bialecki M, Shilton A, Fichtenberg C, Segraves WA, Thummel CS: **Loss of the**  
1689 **ecdysteroid-inducible E75A orphan nuclear receptor uncouples molting from**  
1690 **metamorphosis in *Drosophila*.** *Dev Cell* 2002, **3**:209-220.
- 1691 87. Truman J, Rountree D, Reiss S, Schwartz L: **Ecdysteroids regulate the release and**  
1692 **action of eclosion hormone in the tobacco hornworm, *Manduca sexta* (L.)** *J Insect*  
1693 *Physiol* 1983, **29**:895-900.
- 1694 88. Zitnan D, Kingan TG, Hermesman JL, Adams ME: **Identification of ecdysis-triggering**  
1695 **hormone from an epitracheal endocrine system.** *Science* 1996, **271**:88-91.
- 1696 89. Charles JP, Iwema T, Epa VC, Takaki K, Rynes J, Jindra M: **Ligand-binding properties**  
1697 **of a juvenile hormone receptor, Methoprene-tolerant.** *Proceedings of the National*  
1698 *Academy of Sciences of the United States of America* 2011, **108**:21128-21133.
- 1699 90. Minakuchi C, Zhou X, Riddiford L: **Kruppel homolog 1 (Kr-h1) mediates juvenile**  
1700 **hormone action during metamorphosis of *Drosophila melanogaster*.** *Mech Dev* 2008,  
1701 **125**:91-105.
- 1702 91. Minakuchi C, Namiki T, Shinoda T: **Kruppel homolog 1, an early juvenile hormone-**  
1703 **response gene downstream of Methoprene-tolerant, mediates its anti-metamorphic**  
1704 **action in the red flour beetle *Tribolium castaneum*.** *Dev Biol* 2009, **352**:341-350.
- 1705 92. DiBello PR, Withers DA, Bayer CA, Fristrom JW, Guild GM: **The *Drosophila* Broad-**  
1706 **Complex encodes a family of related proteins containing zinc fingers.** *Genetics* 1991,  
1707 **129**:385-397.
- 1708 93. Karim F, Guild G, Thummel C: **The *Drosophila* Broad-Complex plays a key role in**  
1709 **controlling ecdysone-regulated gene expression at the onset of metamorphosis.**  
1710 *Development* 1993, **118**:977-988.
- 1711 94. Ereyilmaz DF, Riddiford LM, Truman JW: **The pupal specifier broad directs**  
1712 **progressive morphogenesis in a direct-developing insect.** *Proceedings of the National*  
1713 *Academy of Sciences of the United States of America* 2006, **103**:6925-6930.
- 1714 95. Arakane Y, Hogenkamp DG, Zhu YC, Kramer KJ, Specht CA, Beeman RW, Kanost MR,  
1715 Muthukrishnan S: **Characterization of two chitin synthase genes of the red flour**  
1716 **beetle, *Tribolium castaneum*, and alternate exon usage in one of the genes during**  
1717 **development.** *Insect Biochem Mol Biol* 2004, **34**:291-304.
- 1718 96. True JR: **Insect melanism: the molecules matter.** *Trends in Ecology & Evolution* 2003,  
1719 **18**:640-647.
- 1720 97. Zhan SA, Guo QH, Li MH, Li MW, Li JY, Miao XX, Huang YP: **Disruption of an N-**  
1721 **acetyltransferase gene in the silkworm reveals a novel role in pigmentation.**  
1722 *Development* 2010, **137**:4083-4090.
- 1723 98. Liu J, Lemonds TR, Popadic A: **The genetic control of aposematic black pigmentation**  
1724 **in hemimetabolous insects: insights from *Oncopeltus fasciatus*.** *Evolution &*  
1725 *Development* 2014, **16**:270-277.

- 1726 99. Liu J, Lemonds TR, Marden JH, Popadic A: **A Pathway Analysis of Melanin**  
1727 **Patterning in a Hemimetabolous Insect.** *Genetics* 2016, **203**:403-413.
- 1728 100. Lawrence PA: **Some new mutants of large milkweed bug *Oncopeltus fasciatus* Dall.**  
1729 *Genetical Research* 1970, **15**:347-350.
- 1730 101. Morgan ED: *Biosynthesis in Insects: Advanced Edition.* London: Royal Society of  
1731 Chemistry,; 2010.
- 1732 102. McLean JR, Krishnakumar S, O'Donnell JM: **Multiple mRNAs from the Punch locus of**  
1733 ***Drosophila melanogaster* encode isoforms of GTP cyclohydrolase I with distinct N-**  
1734 **terminal domains.** *J Biol Chem* 1993, **268**:27191-27197.
- 1735 103. Wiederrecht GJ, Paton DR, Brown GM: **Enzymatic Conversion of Dihydroneopterin**  
1736 **Triphosphate to the Pyrimidodiazepine Intermediate Involved in the Biosynthesis of**  
1737 **the Drospterins in *Drosophila-Melanogaster*.** *Journal of Biological Chemistry* 1984,  
1738 **259**:2195-2200.
- 1739 104. Newcombe D, Blount JD, Mitchell C, Moore AJ: **Chemical egg defence in the large**  
1740 **milkweed bug, *Oncopeltus fasciatus*, derives from maternal but not paternal diet.**  
1741 *Entomologia Experimentalis et Applicata* 2013, **149**:197-205.
- 1742 105. Zhan S, Merlin C, Boore JL, Reppert SM: **The monarch butterfly genome yields**  
1743 **insights into long-distance migration.** *Cell* 2011, **147**:1171-1185.
- 1744 106. Joseph RM, Carlson JR: ***Drosophila* Chemoreceptors: A Molecular Interface Between**  
1745 **the Chemical World and the Brain.** *Trends Genet* 2015, **31**:683-695.
- 1746 107. Benton R: **Multigene Family Evolution: Perspectives from Insect Chemoreceptors.**  
1747 *Trends Ecol Evol* 2015, **30**:590-600.
- 1748 108. Robertson HM, Warr CG, Carlson JR: **Molecular evolution of the insect**  
1749 **chemoreceptor gene superfamily in *Drosophila melanogaster*.** *Proc Natl Acad Sci U S*  
1750 *A* 2003, **100 Suppl 2**:14537-14542.
- 1751 109. Rytz R, Croset V, Benton R: **Ionotropic receptors (IRs): chemosensory ionotropic**  
1752 **glutamate receptors in *Drosophila* and beyond.** *Insect Biochem Mol Biol* 2013,  
1753 **43**:888-897.
- 1754 110. Kirkness EF, Haas BJ, Sun W, Braig HR, Perotti MA, Clark JM, Lee SH, Robertson HM,  
1755 Kennedy RC, Elhaik E, et al: **Genome sequences of the human body louse and its**  
1756 **primary endosymbiont provide insights into the permanent parasitic lifestyle.** *Proc*  
1757 *Natl Acad Sci U S A* 2010, **107**:12168-12173.
- 1758 111. Smadja C, Shi P, Butlin RK, Robertson HM: **Large gene family expansions and**  
1759 **adaptive evolution for odorant and gustatory receptors in the pea aphid,**  
1760 ***Acyrtosiphon pisum*.** *Mol Biol Evol* 2009, **26**:2073-2086.
- 1761 112. Terrapon N, Li C, Robertson HM, Ji L, Meng X, Booth W, Chen Z, Childers CP, Glastad  
1762 KM, Gokhale K, et al: **Molecular traces of alternative social organization in a termite**  
1763 **genome.** *Nat Commun* 2014, **5**:3636.
- 1764 113. Xu W, Papanicolaou A, Zhang HJ, Anderson A: **Expansion of a bitter taste receptor**  
1765 **family in a polyphagous insect herbivore.** *Sci Rep* 2016, **6**:23666.
- 1766 114. Feir D: ***Oncopeltus fasciatus*: A research animal.** *Annu Rev Entomol* 1974, **19**:81-96.
- 1767 115. Croset V, Rytz R, Cummins SF, Budd A, Brawand D, Kaessmann H, Gibson TJ, Benton  
1768 R: **Ancient protostome origin of chemosensory ionotropic glutamate receptors and**  
1769 **the evolution of insect taste and olfaction.** *PLoS Genet* 2010, **6**:e1001064.
- 1770 116. Vellozo AF, Véron AS, Baa-Puyoulet P, Huerta-Cepas J, Cottret L, Febvay G, Calevro F,  
1771 Rahbe Y, Douglas AE, Gabaldón T, et al: **CycADS: an annotation database system to**  
1772 **ease the development and update of BioCyc databases.** *Database* 2011, **2011**:bar008-  
1773 bar008.
- 1774 117. Baa-Puyoulet P, Parisot N, Febvay G, Huerta-Cepas J, Vellozo AF, Gabaldón T, Calevro  
1775 F, Charles H, Colella S: **ArthropodaCyc: a CycADS powered collection of BioCyc**  
1776 **databases to analyse and compare metabolism of arthropods.** *Database (Oxford)*  
1777 2016, pii:baw081.
- 1778 118. Hojilla-Evangelista MP, Evangelista RL: **Characterization of milkweed (*Asclepias***  
1779 **spp.) seed proteins.** *Industrial crops and ...* 2009.
- 1780 119. Dean CAE, Teets NM, Košťál V, Šimek P, Denlinger DL: **Enhanced stress responses**  
1781 **and metabolic adjustments linked to diapause and onset of migration in the large**  
1782 **milkweed bug *Oncopeltus fasciatus*.** *Physiol Entomol* 2016, DOI: 10.1111/phen.12140.

- 1783 120. Sandström J, Moran N: **How nutritionally imbalanced is phloem sap for aphids?**  
1784 *Entomologia Experimentalis et Applicata* 1999, **91**:203-210.
- 1785 121. Rabatel A, Febvay G, Gaget K, Duport G, Baa-Puyoulet P, Sapountzis P, Bendridi N,  
1786 Rey M, Rahbé Y, Charles H, et al: **Tyrosine pathway regulation is host-mediated in**  
1787 **the pea aphid symbiosis during late embryonic and early larval development.** *BMC*  
1788 *Genomics* 2013, **14**:235.
- 1789 122. Dobler S, Petschenka G, Wagschal V, Flacht L: **Convergent adaptive evolution – how**  
1790 **insects master the challenge of cardiac glycoside-containing host plants.** *Entomologia*  
1791 *Experimentalis et Applicata* 2015, **157**:30-39.
- 1792 123. Niehuis O, Gibson JD, Rosenberg MS, Pannebakker BA, Koevoets T, Judson AK,  
1793 Desjardins CA, Kennedy K, Duggan D, Beukeboom LW, et al: **Recombination and its**  
1794 **impact on the genome of the haplodiploid parasitoid wasp Nasonia.** *PLoS One* 2010,  
1795 **5**:e8597.
- 1796 124. Ferrero A, Torreblanca A, Garcera MD: **Assessment of the effects of orally**  
1797 **administered ferrous sulfate on *Oncopeltus fasciatus* (Heteroptera: Lygaeidae).**  
1798 *Environ Sci Pollut Res Int* 2017, **24**:8551-8561.
- 1799 125. Hare EE, Johnston JS: **Genome size determination using flow cytometry of propidium**  
1800 **iodide-stained nuclei.** *Methods Mol Biol* 2011, **772**:3-12.
- 1801 126. Marçais G, Kingsford C: **A fast, lock-free approach for efficient parallel counting of**  
1802 **occurrences of k-mers.** *Bioinformatics* 2011, **27**:764-770.
- 1803 127. Bushnell B: **BBMap short read aligner.** 2016. <http://sourceforge.net/projects/bbmap>
- 1804 128. Gnerre S, Maccallum I, Przybylski D, Ribeiro FJ, Burton JN, Walker BJ, Sharpe T, Hall  
1805 G, Shea TP, Sykes S, et al: **High-quality draft assemblies of mammalian genomes**  
1806 **from massively parallel sequence data.** *Proc Natl Acad Sci U S A* 2011, **108**:1513-  
1807 1518.
- 1808 129. Holt C, Yandell M: **MAKER2: an annotation pipeline and genome-database**  
1809 **management tool for second-generation genome projects.** *BMC Bioinformatics* 2011,  
1810 **12**:491.
- 1811 130. Lee E, Helt G, Reese J, Munoz-Torres M, Childers C, Buels R, Stein L, Holmes I, Elsieck  
1812 C, Lewis S: **Web Apollo: a web-based genomic annotation editing platform.** *Genome*  
1813 *Biology* 2013, **14**.
- 1814 131. Poelchau M, Childers C, Moore G, Tsavatapalli V, Evans J, Lee CY, Lin H, Lin JW,  
1815 Hackett K: **The i5k Workspace@NAL--enabling genomic data access, visualization**  
1816 **and curation of arthropod genomes.** *Nucleic Acids Res* 2015, **43**:D714-719.
- 1817 132. Hughes DST, Koelzer S, Panfilio KA, Richards S: ***Oncopeltus fasciatus* genome**  
1818 **annotations v0.5.3.** *Ag Data Commons (Database)*  
1819 2015:<http://dx.doi.org/10.15482/USDA.ADC/1173237>.
- 1820 133. Murali SC, The i5k genome assembly team (29 additional authors), Han Y, Richards S,  
1821 Worley K, Muzny D, Gibbs R, Koelzer S, Panfilio KA: ***Oncopeltus fasciatus* genome**  
1822 **assembly 1.0.** *Ag Data Commons (Database)*  
1823 2015:<http://dx.doi.org/10.15482/USDA.ADC/1173238>.
- 1824 134. Vargas Jentzsch IM, Hughes DST, Poelchau M, Robertson HM, Benoit JB, Rosendale  
1825 AJ, Armisen D, Duncan EJ, Vreede BMI, Jacobs CGC, et al: ***Oncopeltus fasciatus***  
1826 **Official Gene Set OGS\_v1.1 for genome assembly *Oncopeltus fasciatus* v1.0.** *Ag Data*  
1827 *Commons (Database)* 2015:<http://dx.doi.org/10.15482/USDA.ADC/1173142>.
- 1828 135. **RepeatModeler Open-1.0.8** [<http://www.repeatmasker.org>]
- 1829 136. Bao Z, Eddy SR: **Automated de novo identification of repeat sequence families in**  
1830 **sequenced genomes.** *Genome Res* 2002, **12**:1269-1276.
- 1831 137. Price AL, Jones NC, Pevzner PA: **De novo identification of repeat families in large**  
1832 **genomes.** *Bioinformatics* 2005, **21 Suppl 1**:i351-358.
- 1833 138. Benson G: **Tandem repeats finder: a program to analyze DNA sequences.** *Nucleic*  
1834 *Acids Res* 1999, **27**:573-580.
- 1835 139. **RepeatMasker Open-4.0.** [<http://www.repeatmasker.org>]
- 1836 140. Langmead B, Salzberg SL: **Fast gapped-read alignment with Bowtie 2.** *Nat Methods*  
1837 2012, **9**:357-359.

- 1838 141. Goff S, Vaughn M, McKay S, Lyons E, Stapleton A, Gessler D, Matasci N, Wang L,  
1839 Hanlon M, Lenards A, et al: **The iPlant Collaborative: Cyberinfrastructure for Plant**  
1840 **Biology**. *Frontiers in plant science* 2011, **2**.
- 1841 142. Grabherr MG, Haas BJ, Yassour M, Levin JZ, Thompson DA, Amit I, Adiconis X, Fan L,  
1842 Raychowdhury R, Zeng Q, et al: **Full-length transcriptome assembly from RNA-Seq**  
1843 **data without a reference genome**. *Nat Biotechnol* 2011, **29**:644-652.
- 1844 143. Haas BJ, Papanicolaou A, Yassour M, Grabherr M, Blood PD, Bowden J, Couger MB,  
1845 Eccles D, Li B, Lieber M, et al: **De novo transcript sequence reconstruction from**  
1846 **RNA-seq using the Trinity platform for reference generation and analysis**. *Nat*  
1847 *Protoc* 2013, **8**:1494-1512.
- 1848 144. Li B, Dewey CN: **RSEM: accurate transcript quantification from RNA-Seq data**  
1849 **with or without a reference genome**. *BMC Bioinformatics* 2011, **12**:323.
- 1850 145. Finn RD, Mistry J, Tate J, Coggill P, Heger A, Pollington JE, Gavin OL, Gunasekaran P,  
1851 Ceric G, Forslund K, et al: **The Pfam protein families database**. *Nucleic Acids Res*  
1852 2010, **38**:D211-222.
- 1853 146. Weirauch MT, Hughes TR: **A catalogue of eukaryotic transcription factor types, their**  
1854 **evolutionary origin, and species distribution**. *Subcell Biochem* 2011, **52**:25-73.
- 1855 147. Eddy SR: **A new generation of homology search tools based on probabilistic**  
1856 **inference**. *Genome Inform* 2009, **23**:205-211.
- 1857 148. Sievers F, Wilm A, Dineen D, Gibson TJ, Karplus K, Li W, Lopez R, McWilliam H,  
1858 Remmert M, Soding J, et al: **Fast, scalable generation of high-quality protein multiple**  
1859 **sequence alignments using Clustal Omega**. *Mol Syst Biol* 2011, **7**:539.
- 1860 149. Moriya Y, Itoh M, Okuda S, Yoshizawa AC, Kanehisa M: **KAAS: an automatic genome**  
1861 **annotation and pathway reconstruction server**. *Nucleic Acids Research* 2007,  
1862 **35**:W182-185.
- 1863 150. Claudel-Renard C, Chevalet C, Faraut T, Kahn D: **Enzyme-specific profiles for genome**  
1864 **annotation: PRIAM**. *Nucleic Acids Research* 2003, **31**:6633-6639.
- 1865 151. Conesa A, Götz S: **Blast2GO: A Comprehensive Suite for Functional Analysis in**  
1866 **Plant Genomics**. *International journal of plant genomics* 2008, **2008**:619832.
- 1867 152. Conesa A, Götz S, García-Gómez JM, Terol J, Talón M, Robles M: **Blast2GO: a**  
1868 **universal tool for annotation, visualization and analysis in functional genomics**  
1869 **research**. *Bioinformatics (Oxford, England)* 2005, **21**:3674-3676.
- 1870 153. Jones P, Binns D, Chang H-Y, Fraser M, Li W, McAnulla C, McWilliam H, Maslen J,  
1871 Mitchell A, Nuka G, et al: **InterProScan 5: genome-scale protein function**  
1872 **classification**. *Bioinformatics* 2014, **30**:1236-1240.
- 1873 154. Karp PD, Ouzounis CA, Moore-Kochlacs C, Goldovsky L, Kaipa P, Ahrén D, Tsoka S,  
1874 Darzentas N, Kunin V, López-Bigas N: **Expansion of the BioCyc collection of**  
1875 **pathway/genome databases to 160 genomes**. *Nucleic Acids Research* 2005, **33**:6083-  
1876 6089.
- 1877 155. Karp PD, Paley SM, Krummenacker M, Latendresse M, Dale JM, Lee TJ, Kaipa P,  
1878 Gilham F, Spaulding A, Popescu L, et al: **Pathway Tools version 13.0: integrated**  
1879 **software for pathway/genome informatics and systems biology**. *Briefings in*  
1880 *Bioinformatics* 2010, **11**:40-79.
- 1881 156. Dereeper A, Guignon V, Blanc G, Audic S, Buffet S, Chevenet F, Dufayard JF, Guindon  
1882 S, Lefort V, Lescot M, et al: **Phylogeny.fr: robust phylogenetic analysis for the non-**  
1883 **specialist**. *Nucleic Acids Res* 2008, **36**:W465-469.
- 1884 157. Wang X, Fang X, Yang P, Jiang X, Jiang F, Zhao D, Li B, Cui F, Wei J, Ma C, et al: **The**  
1885 **locust genome provides insight into swarm formation and long-distance flight**. *Nat*  
1886 *Commun* 2014, **5**:2957.
- 1887 158. The International Silkworm Genome Consortium: **The genome of a lepidopteran model**  
1888 **insect, the silkworm Bombyx mori**. *Insect Biochem Mol Biol* 2008, **38**:1036-1045.
- 1889 159. Elsik CG, Worley KC, Bennett AK, Beye M, Camara F, Childers CP, de Graaf DC,  
1890 Debysy G, Deng J, Devreese B, et al: **Finding the missing honey bee genes: lessons**  
1891 **learned from a genome upgrade**. *BMC Genomics* 2014, **15**:86.
- 1892 160. Honeybee Genome Sequencing Consortium: **Insights into social insects from the**  
1893 **genome of the honeybee Apis mellifera**. *Nature* 2006, **443**:931-949.

- 1894 161. Richards S, Gibbs RA, Weinstock GM, Brown SJ, Denell R, Beeman RW, Gibbs R,  
1895 Bucher G, Friedrich M, Grimmelikhuijzen CJ, et al: **The genome of the model beetle**  
1896 **and pest *Tribolium castaneum***. *Nature* 2008, **452**:949-955.
- 1897 162. Chen XG, Jiang X, Gu J, Xu M, Wu Y, Deng Y, Zhang C, Bonizzoni M, Dermauw W,  
1898 Vontas J, et al: **Genome sequence of the Asian Tiger mosquito, *Aedes albopictus*,**  
1899 **reveals insights into its biology, genetics, and evolution**. *Proc Natl Acad Sci U S A*  
1900 2015, **112**:E5907-5915.
- 1901 163. Ellis LL, Huang W, Quinn AM, Ahuja A, Alfrejd B, Gomez FE, Hjelmen CE, Moore KL,  
1902 Mackay TF, Johnston JS, Tarone AM: **Intrapopulation genome size variation in *D.***  
1903 ***melanogaster* reflects life history variation and plasticity**. *PLoS Genet* 2014,  
1904 **10**:e1004522.
- 1905 164. Kumar S, Stecher G, Tamura K: **MEGA7: Molecular Evolutionary Genetics Analysis**  
1906 **Version 7.0 for Bigger Datasets**. *Mol Biol Evol* 2016, **33**:1870-1874.
- 1907



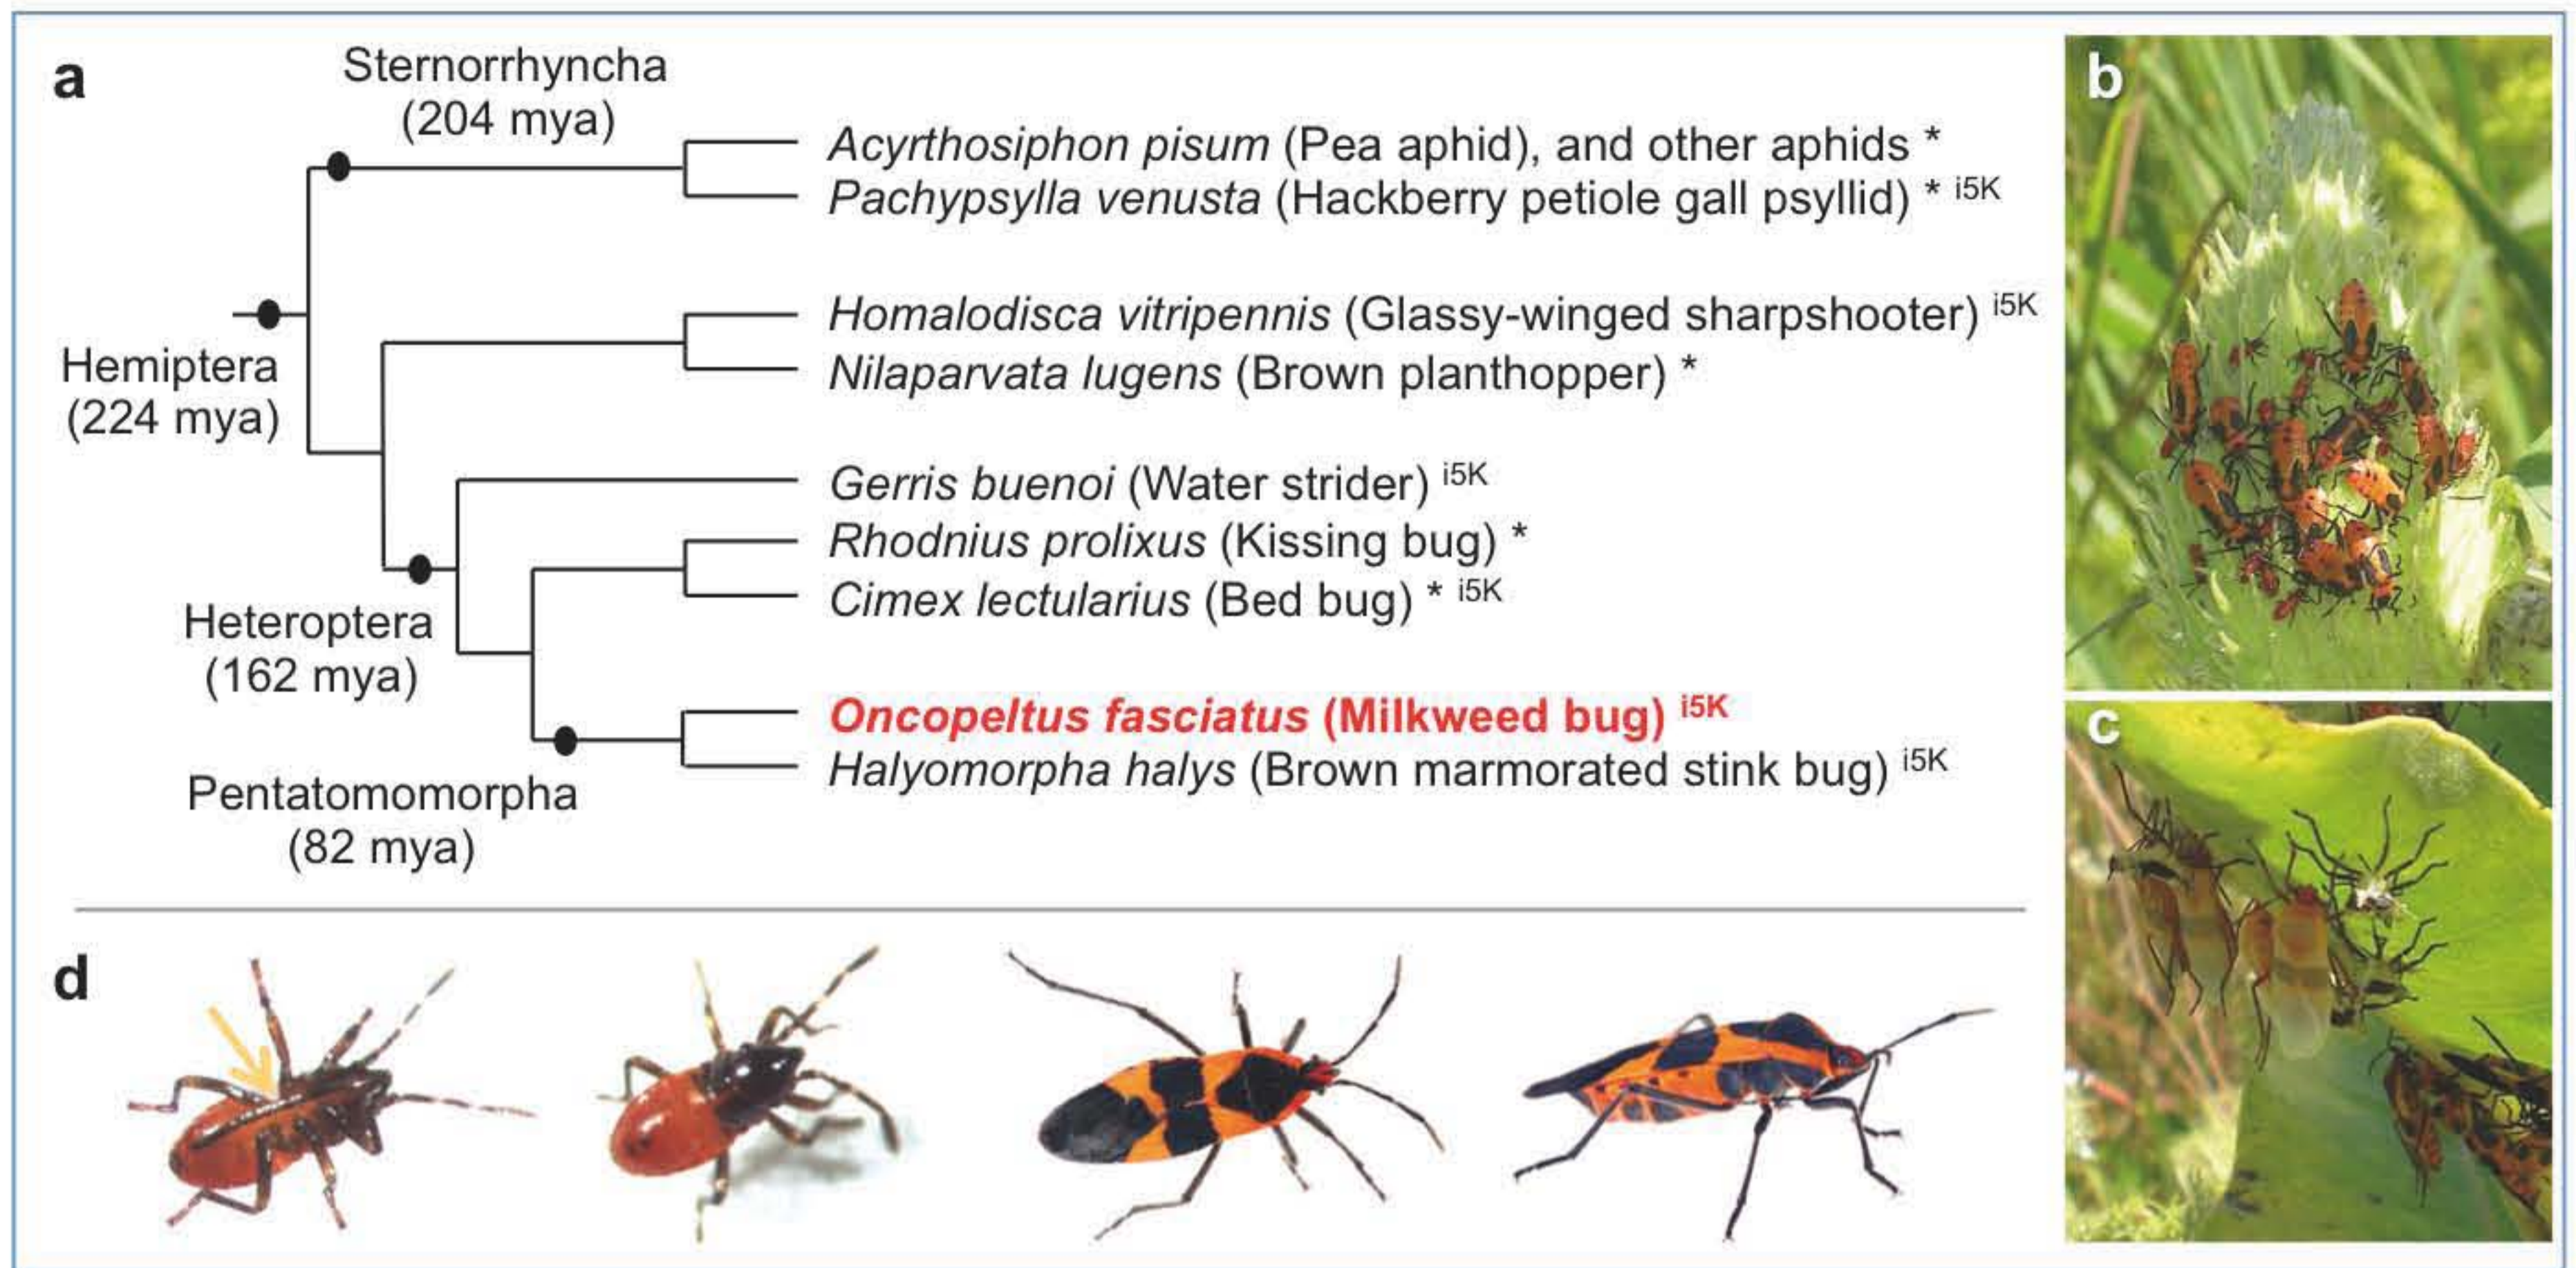

**Fig 1. The large milkweed bug, *Oncopeltus fasciatus*, shown in its phylogenetic and environmental context.**

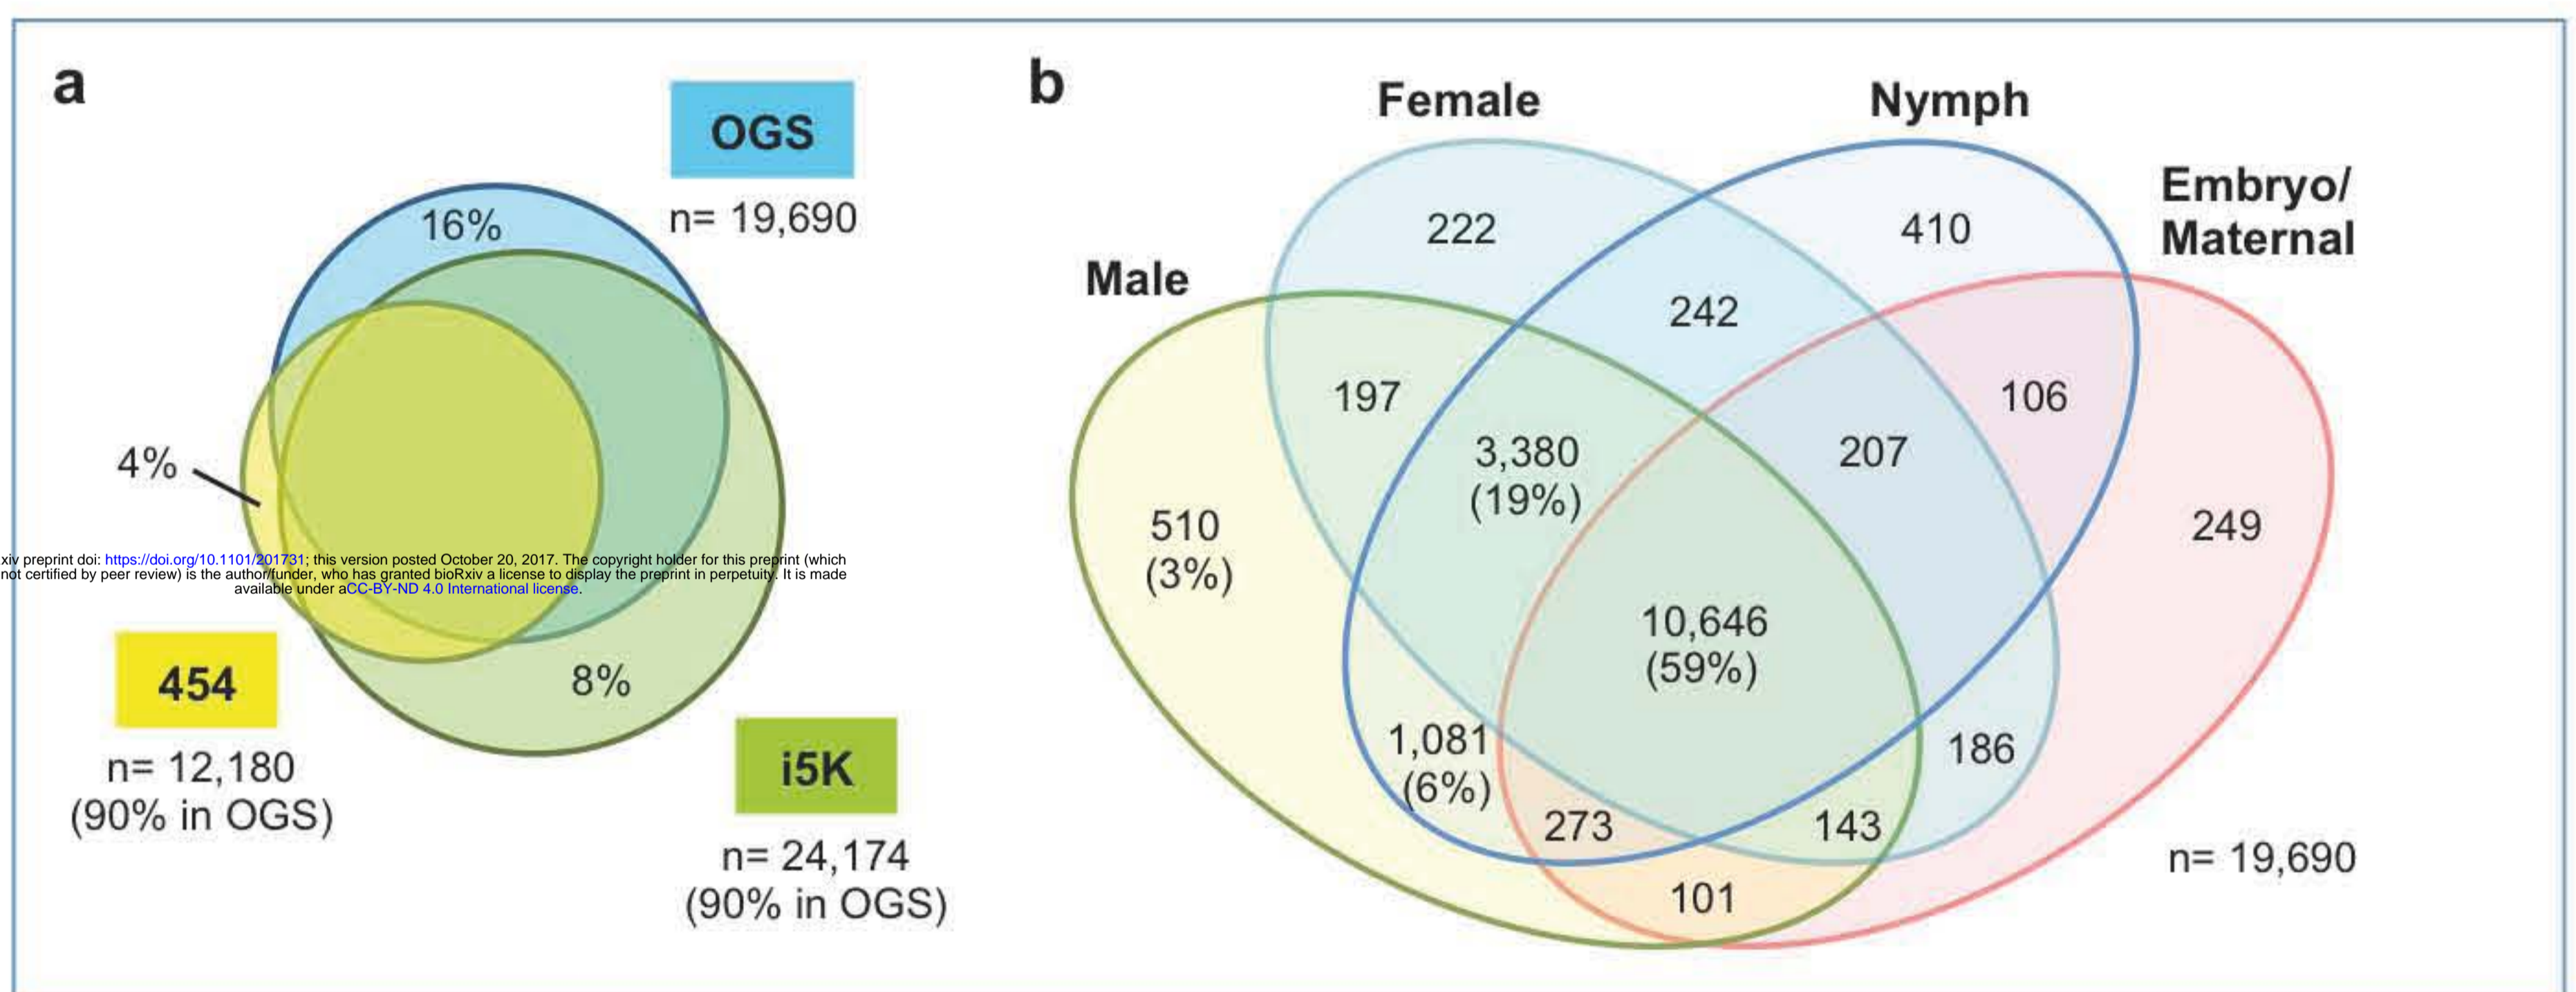

**Fig 2. Comparisons of the official gene set and transcriptomic resources.**

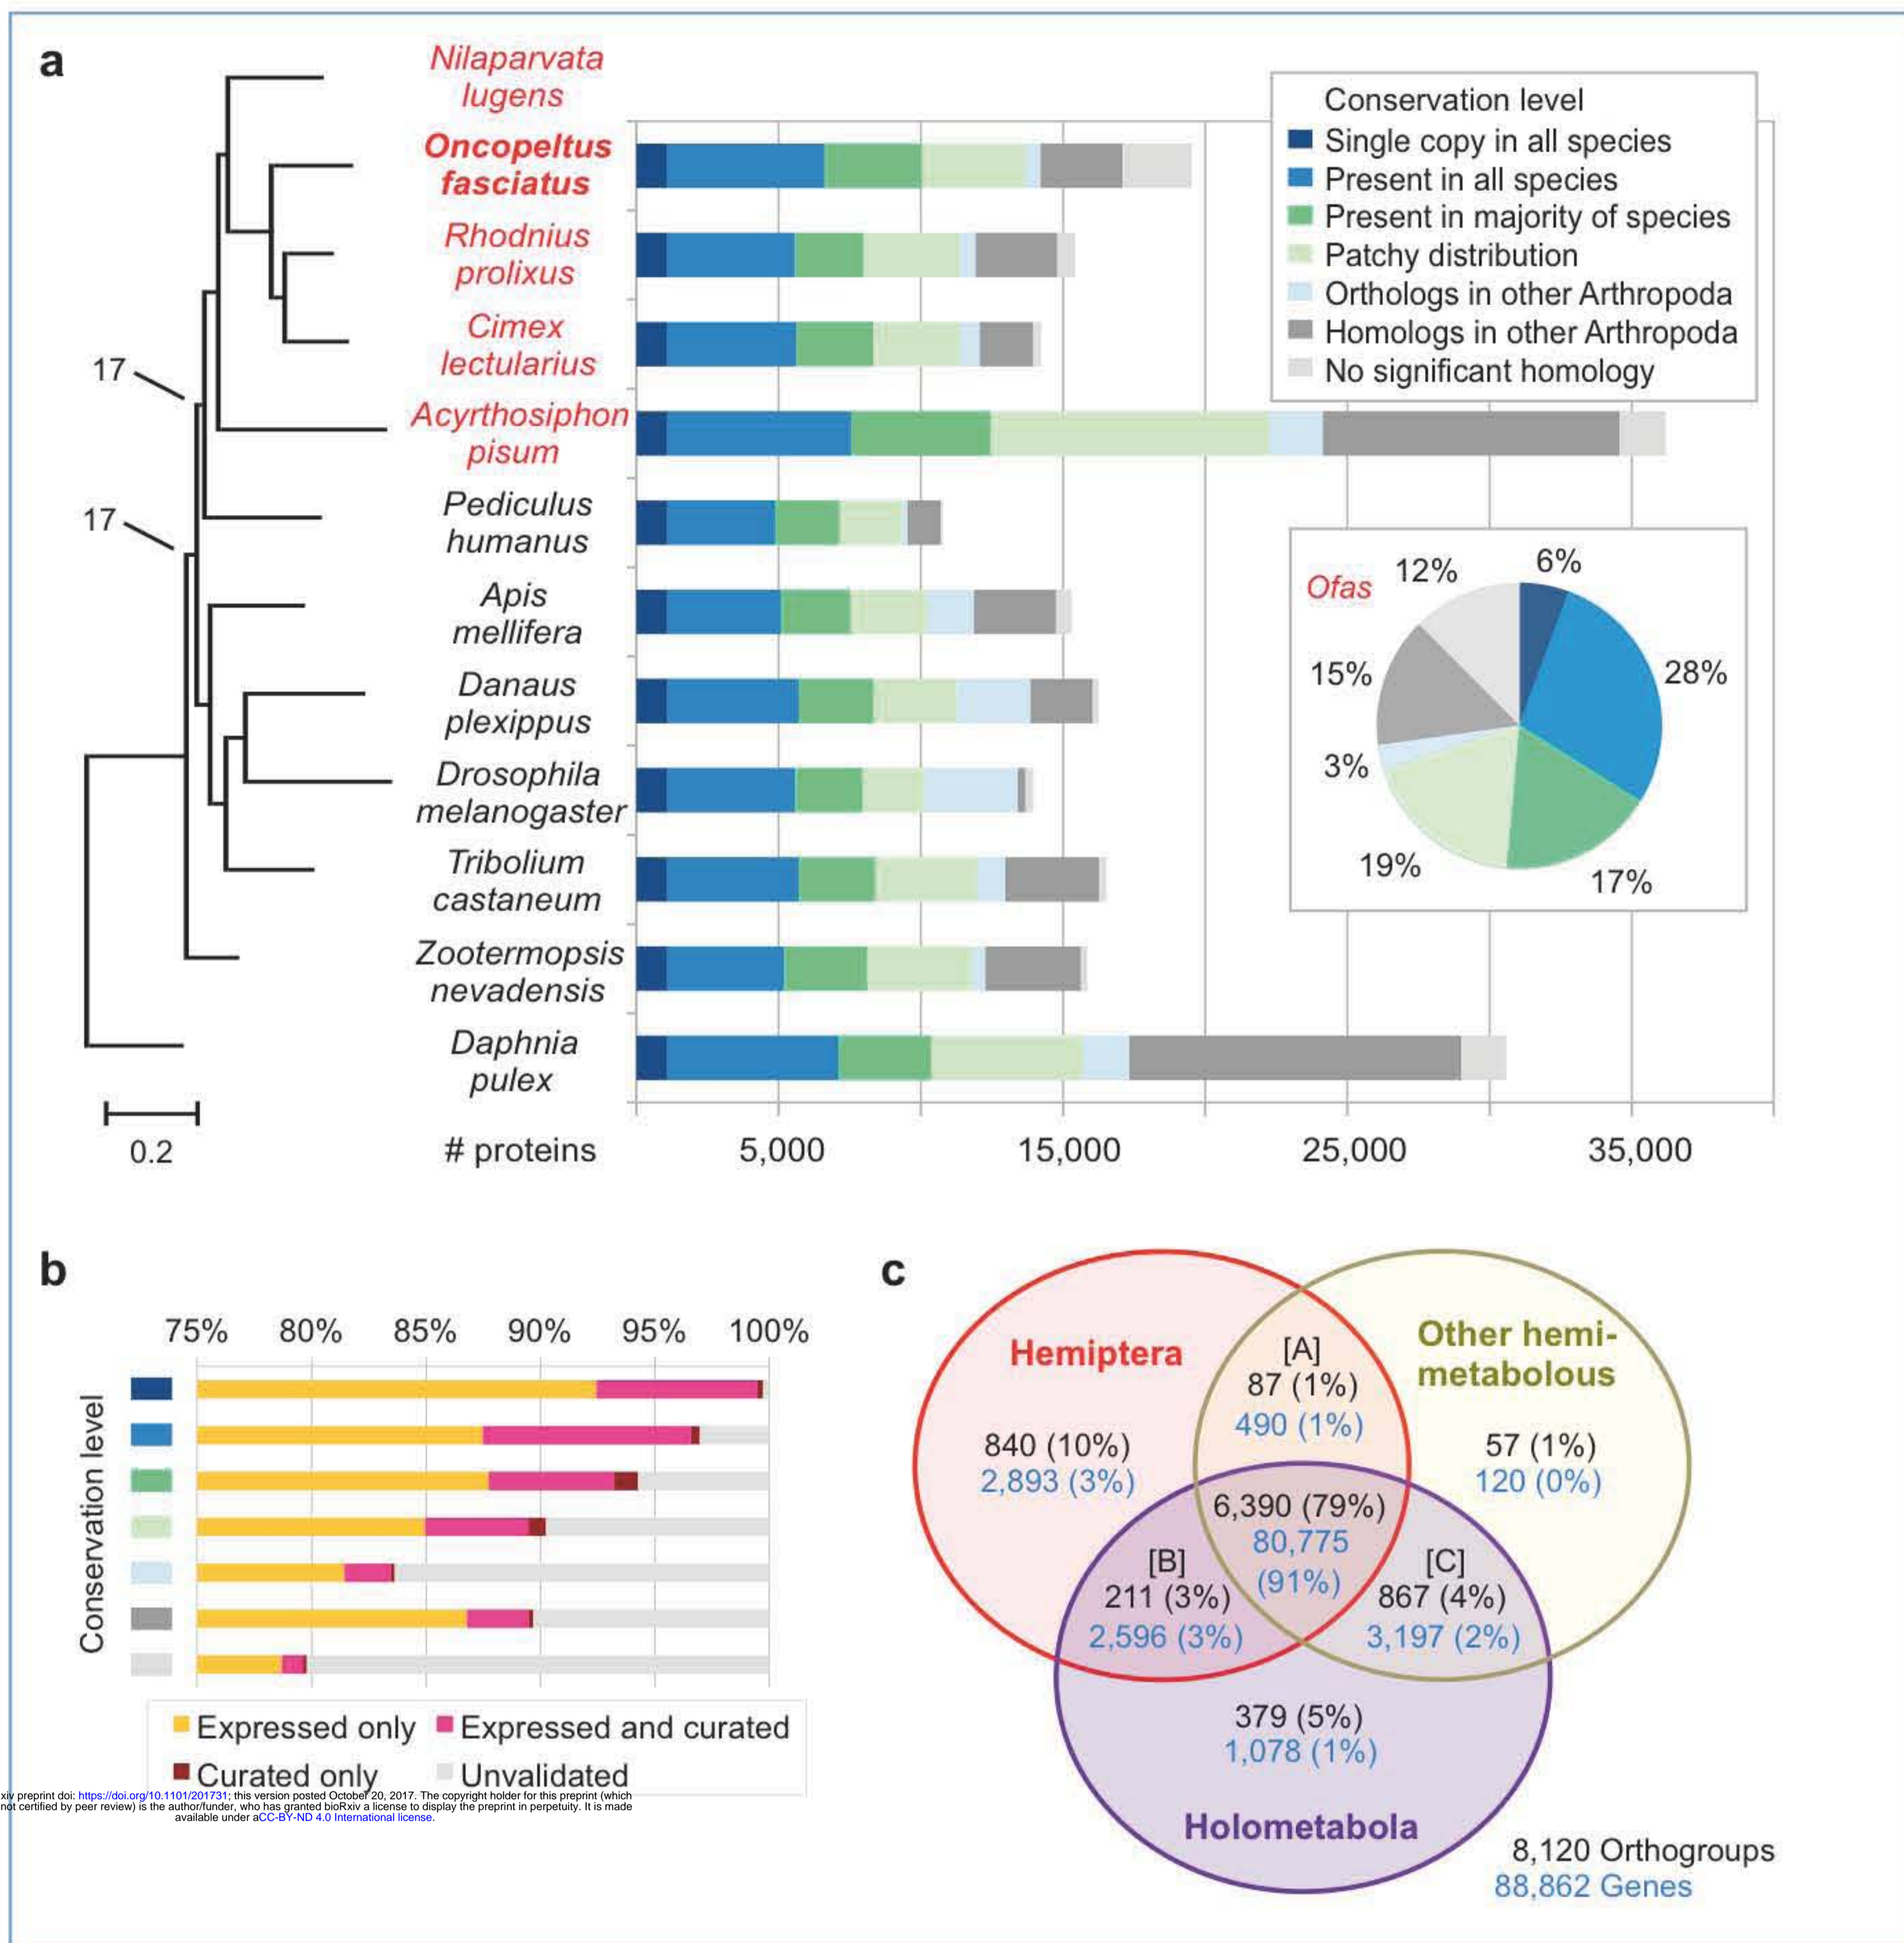

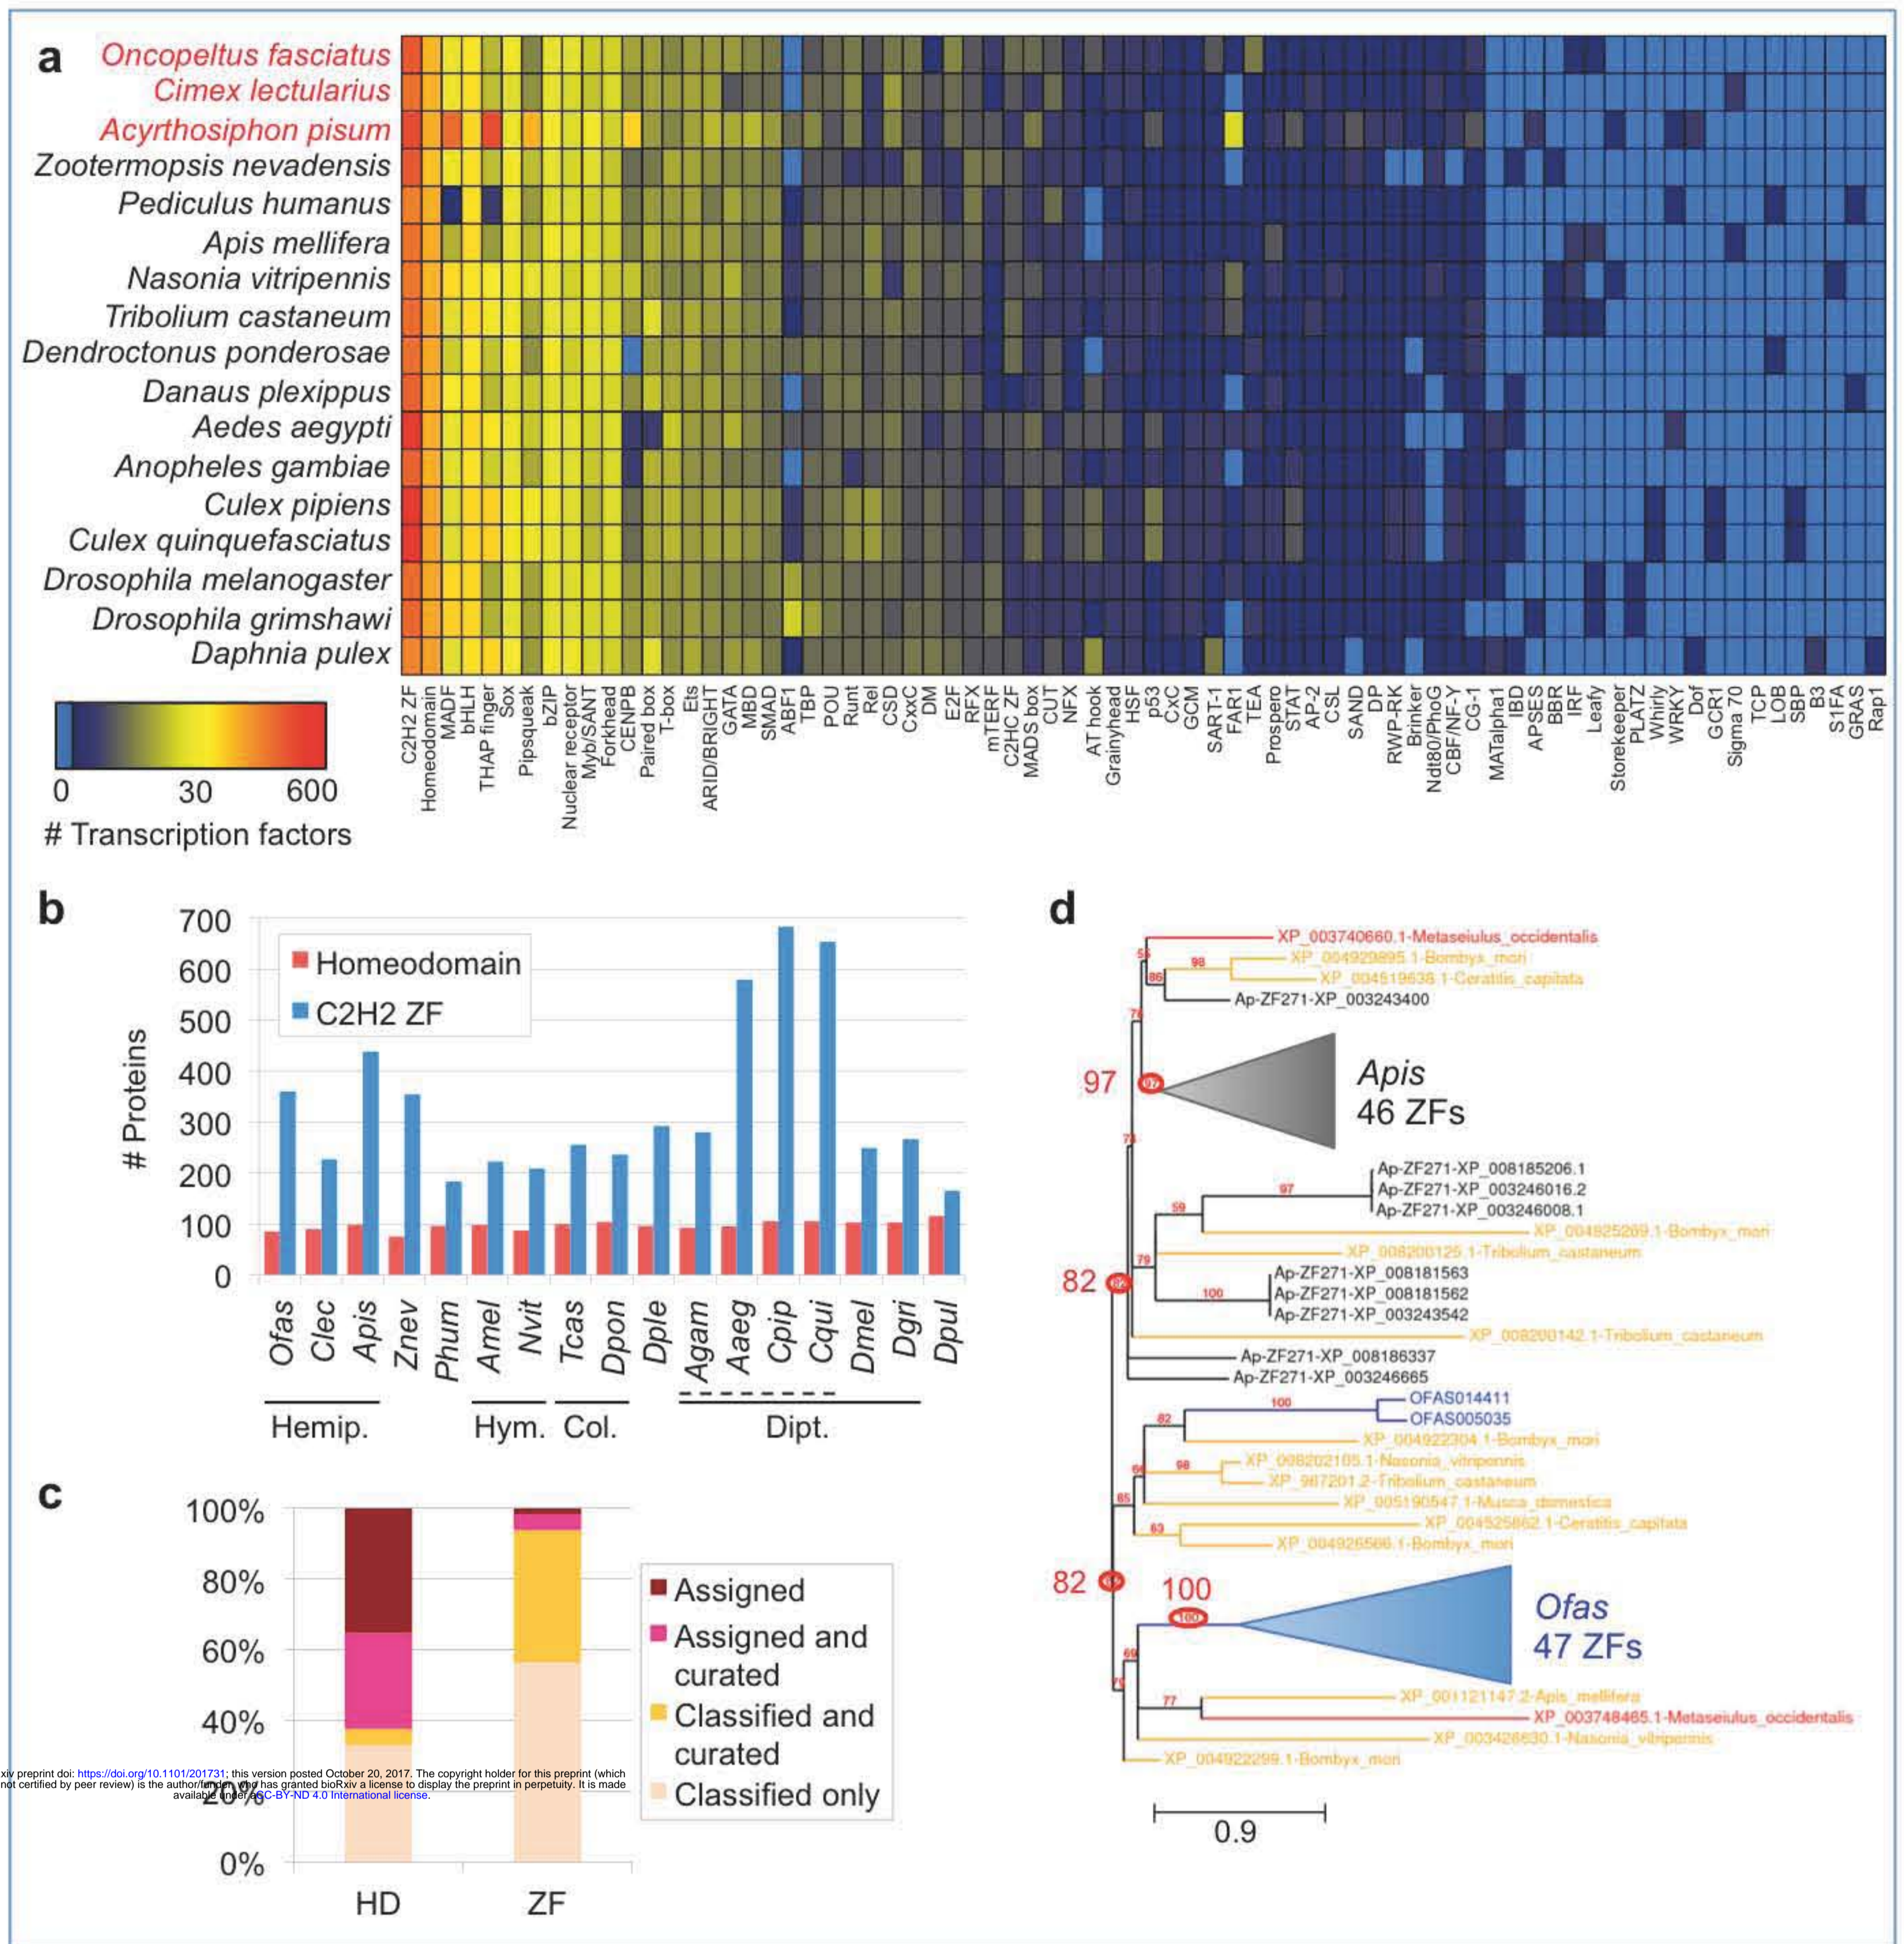

**Fig 4. Distribution of transcription factor families across insect genomes.**

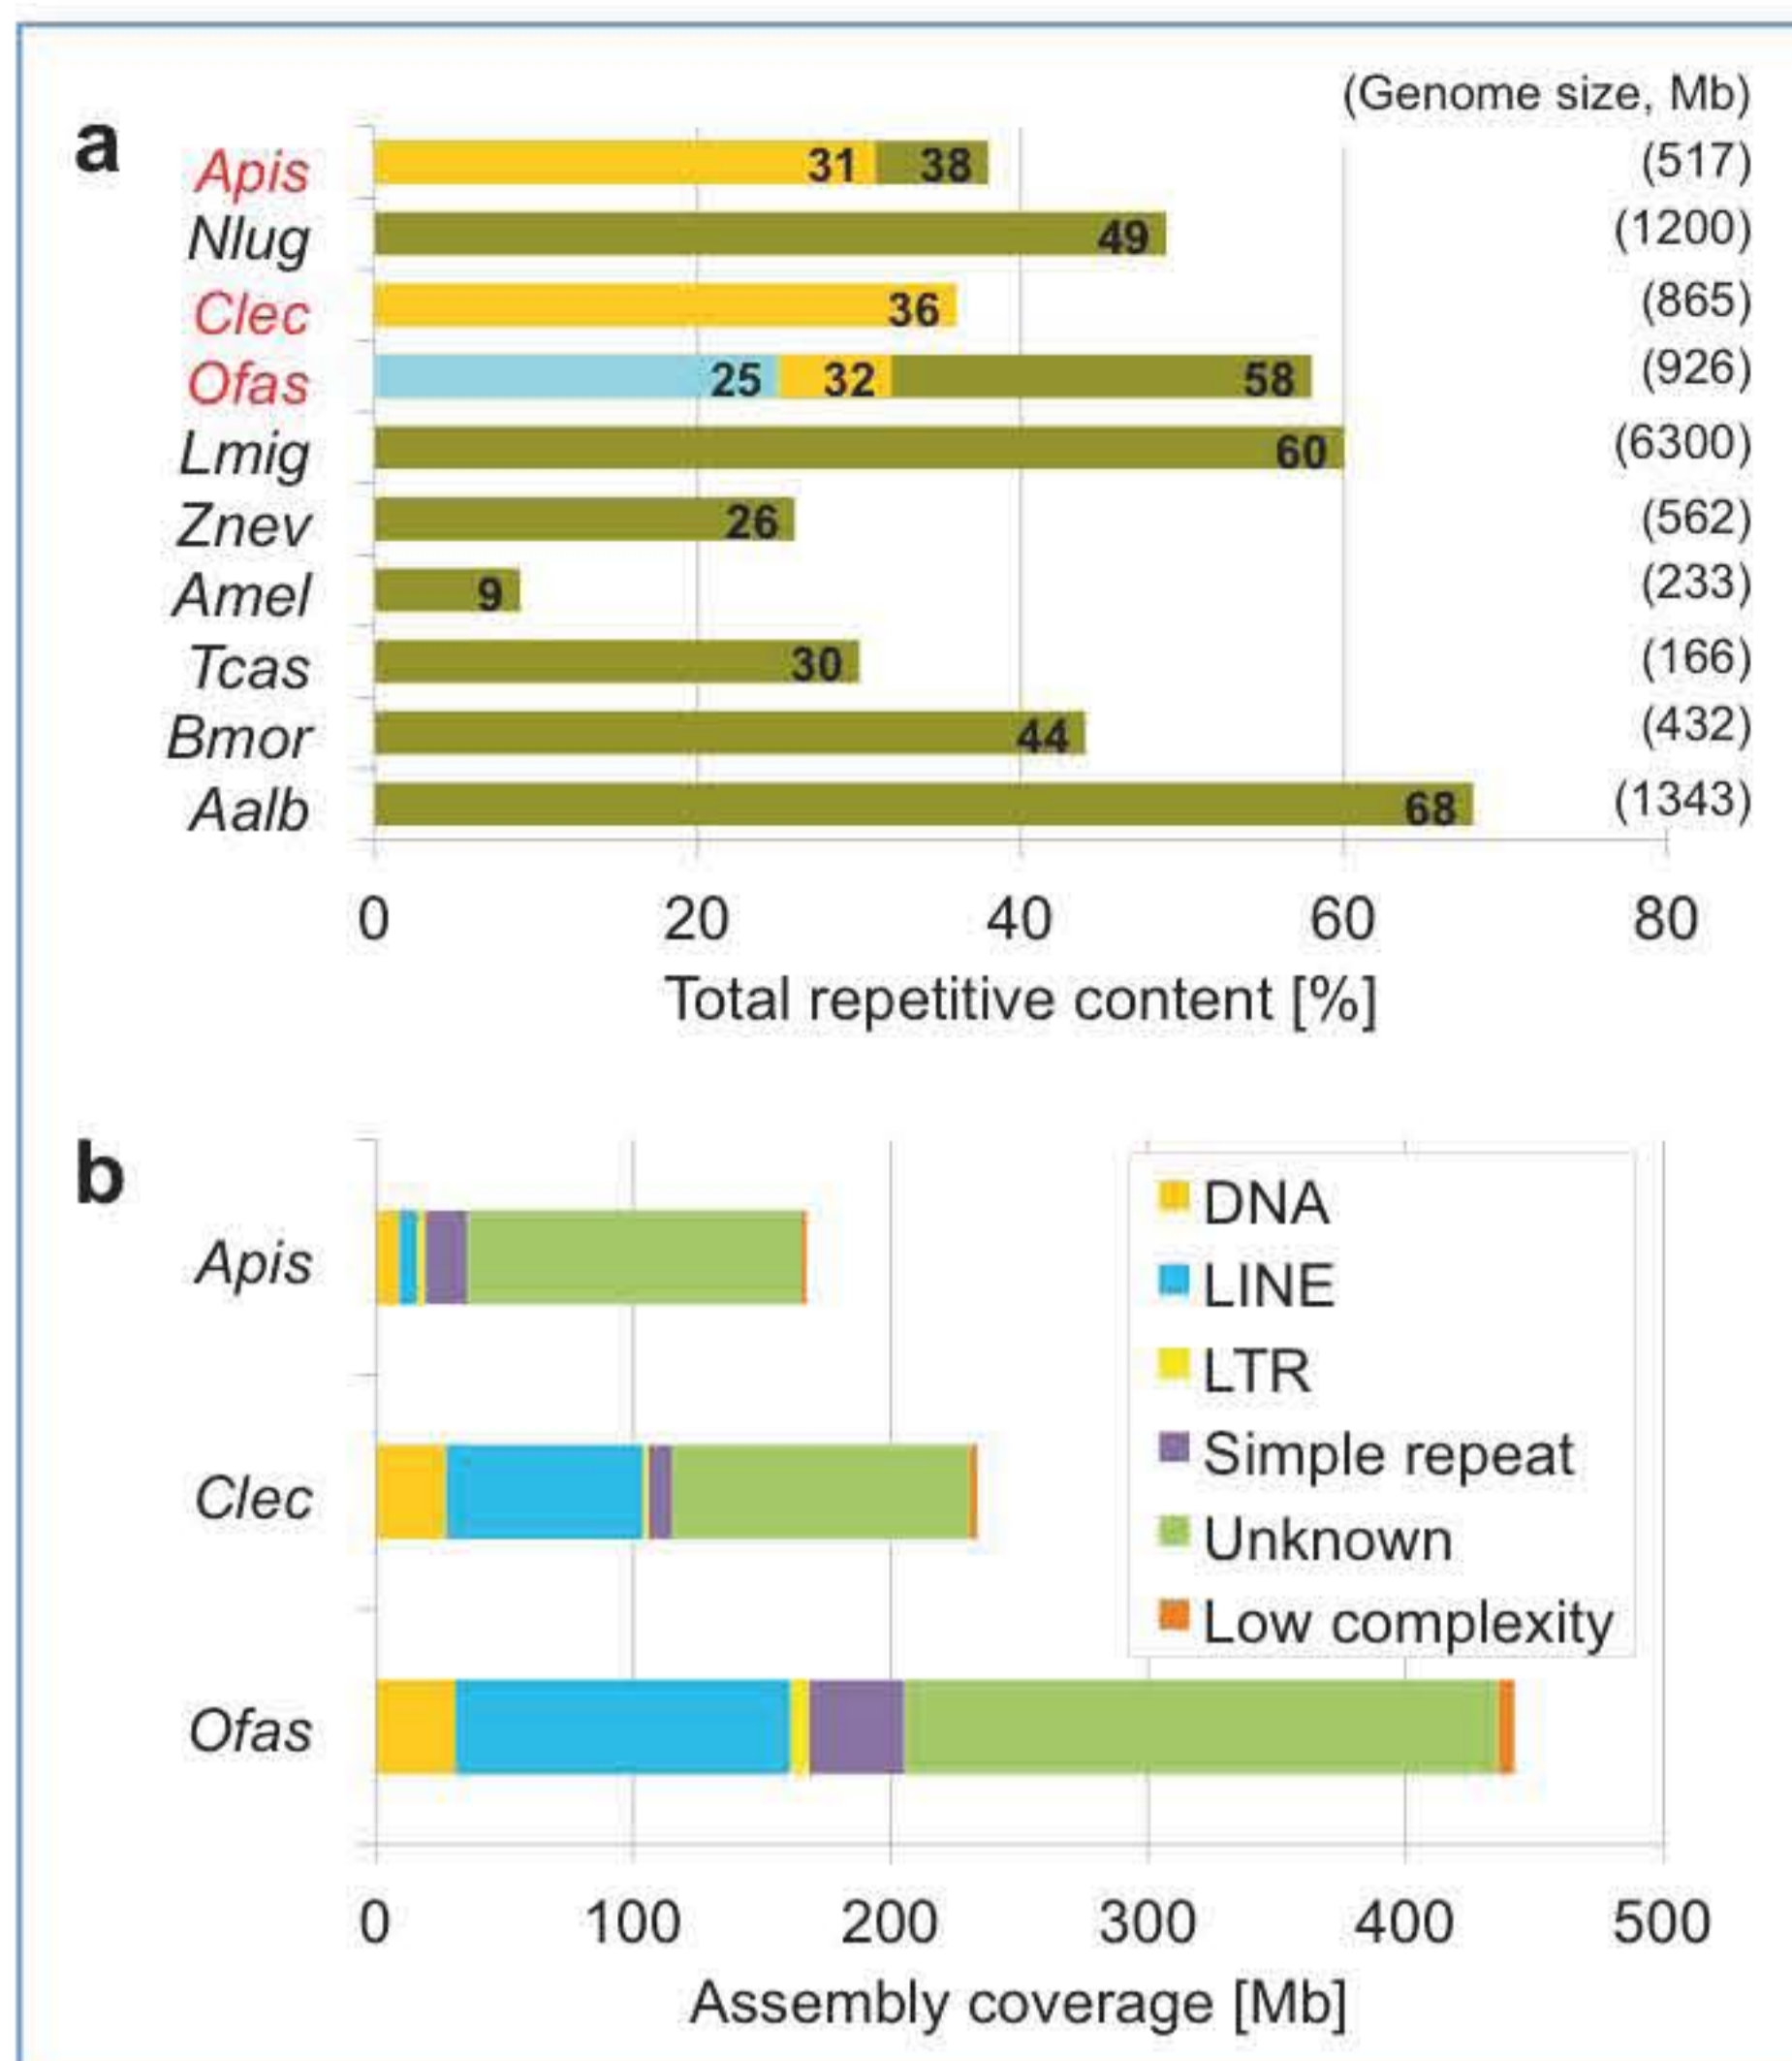

**Fig 5. Comparison of repeat content estimations.**

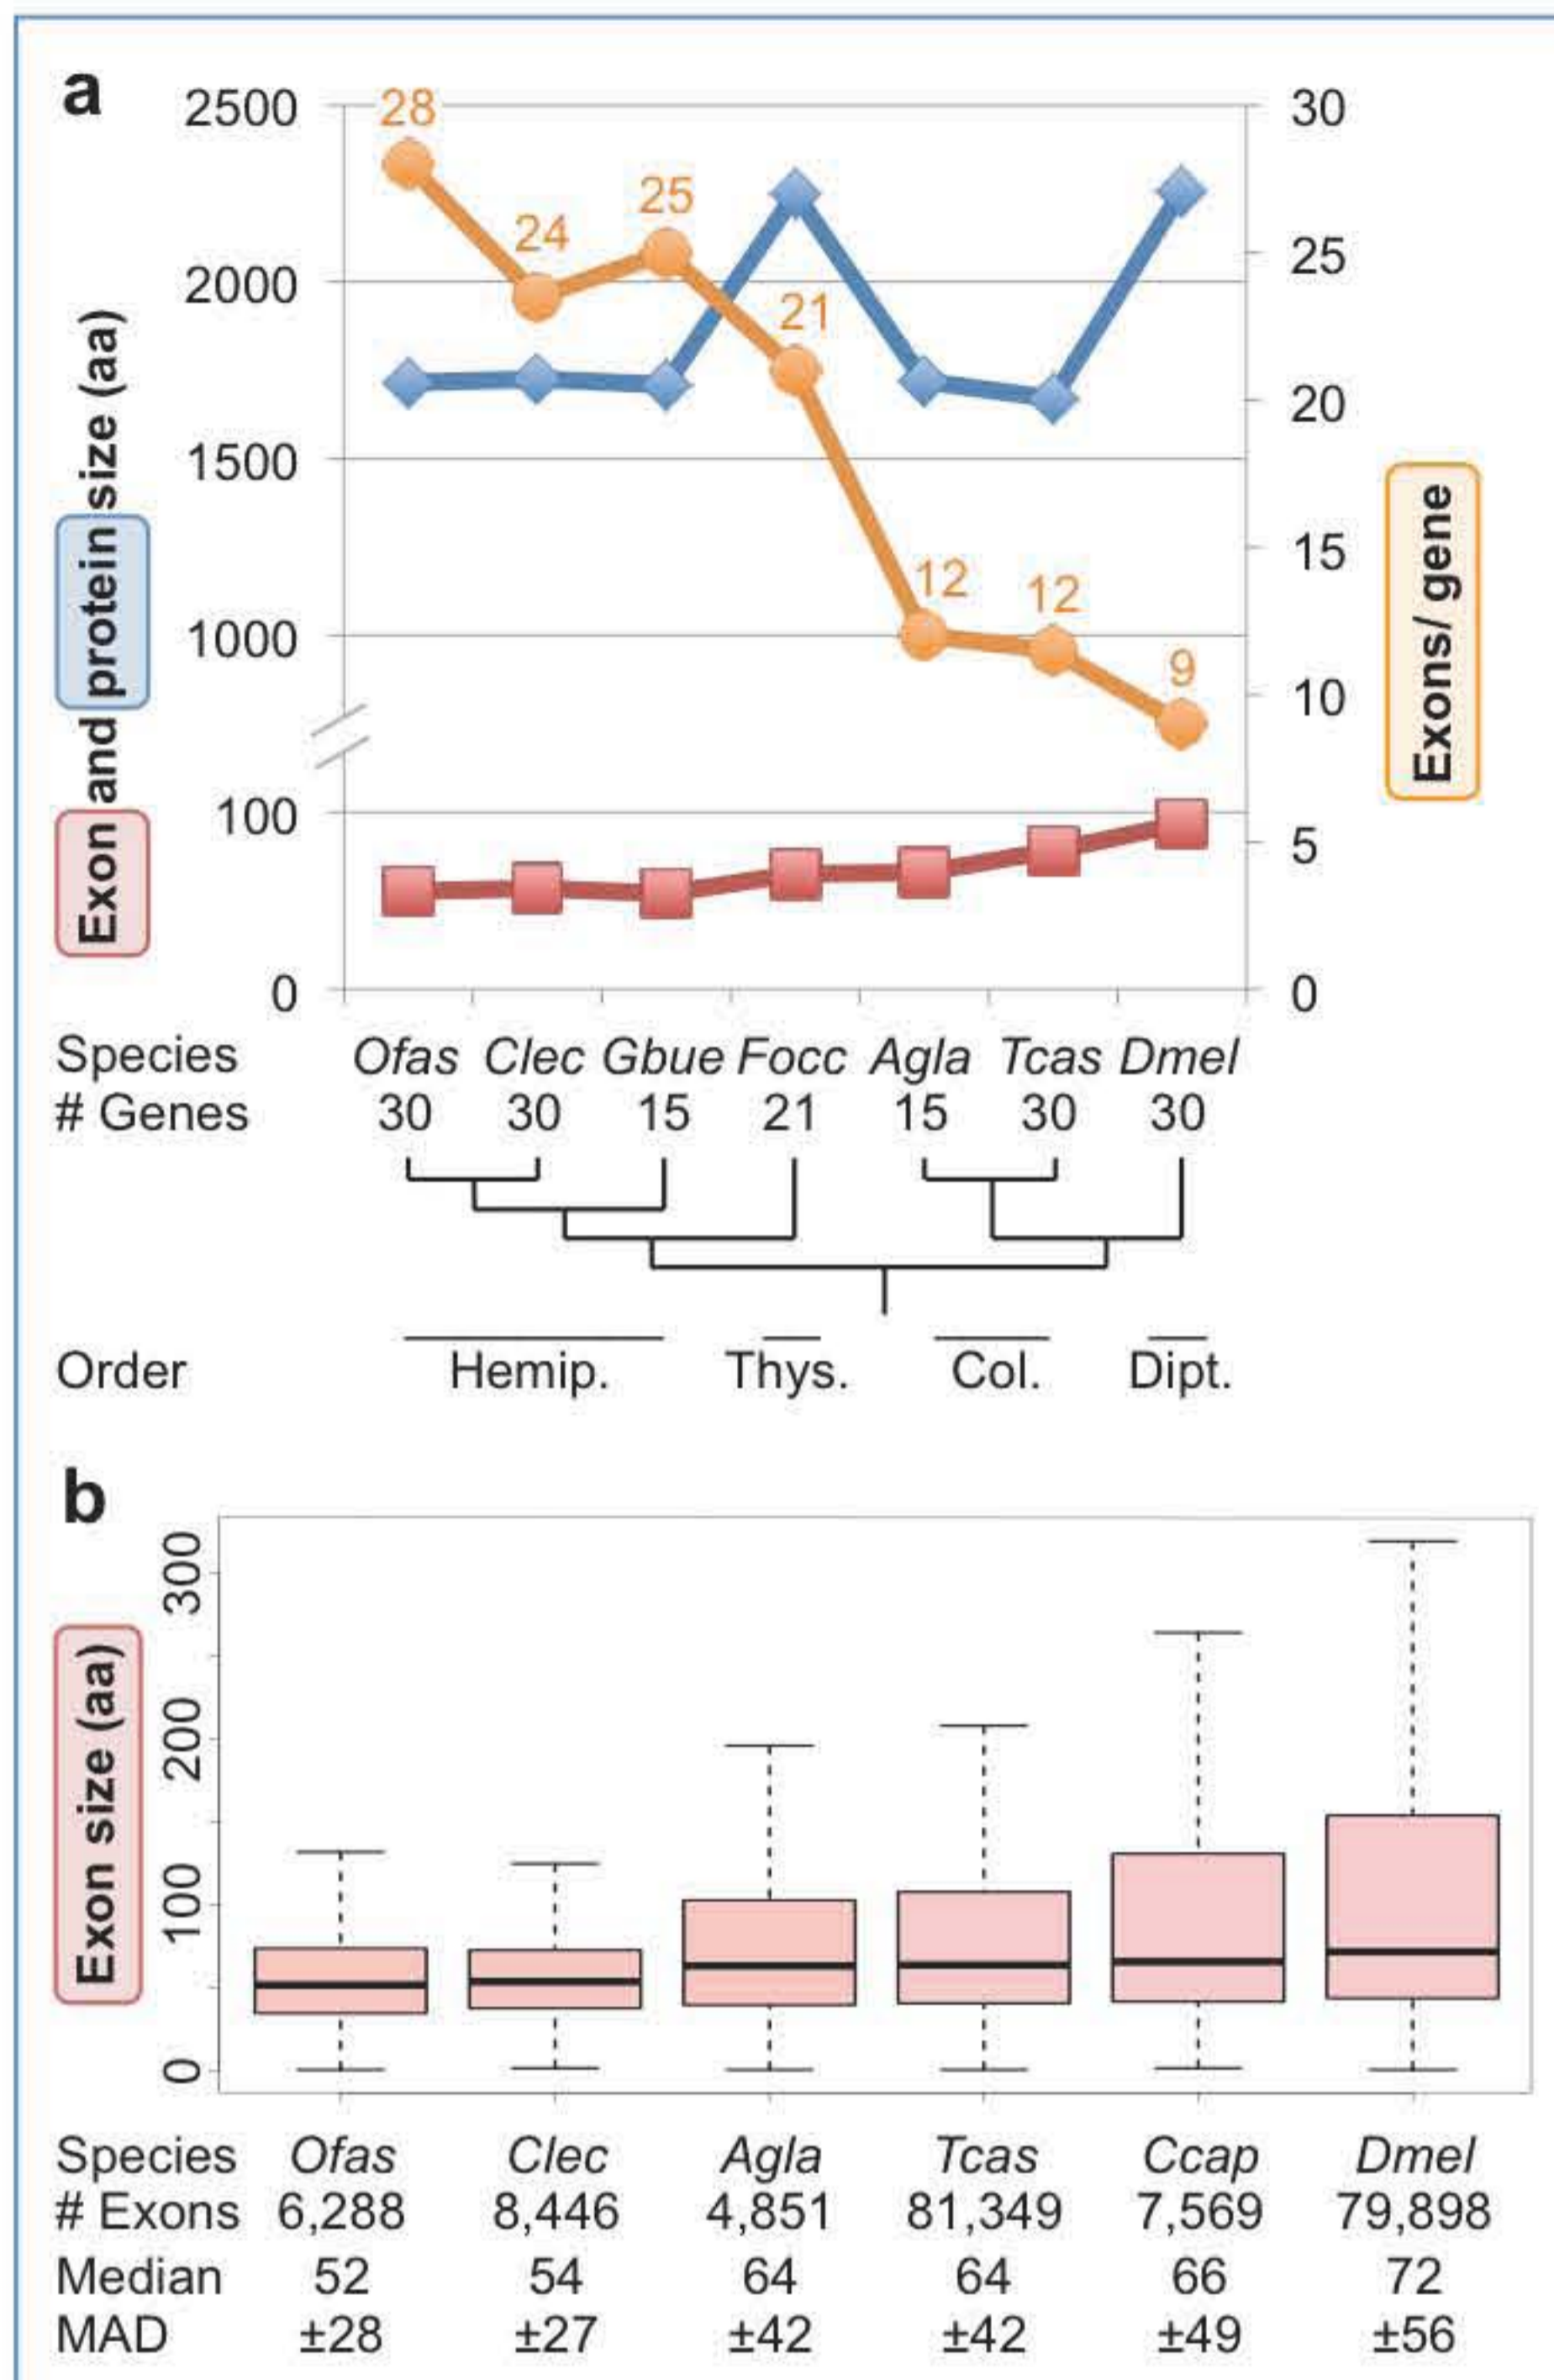

**Fig 6. Trends in gene structure show hemipteroid-specific tendencies.**

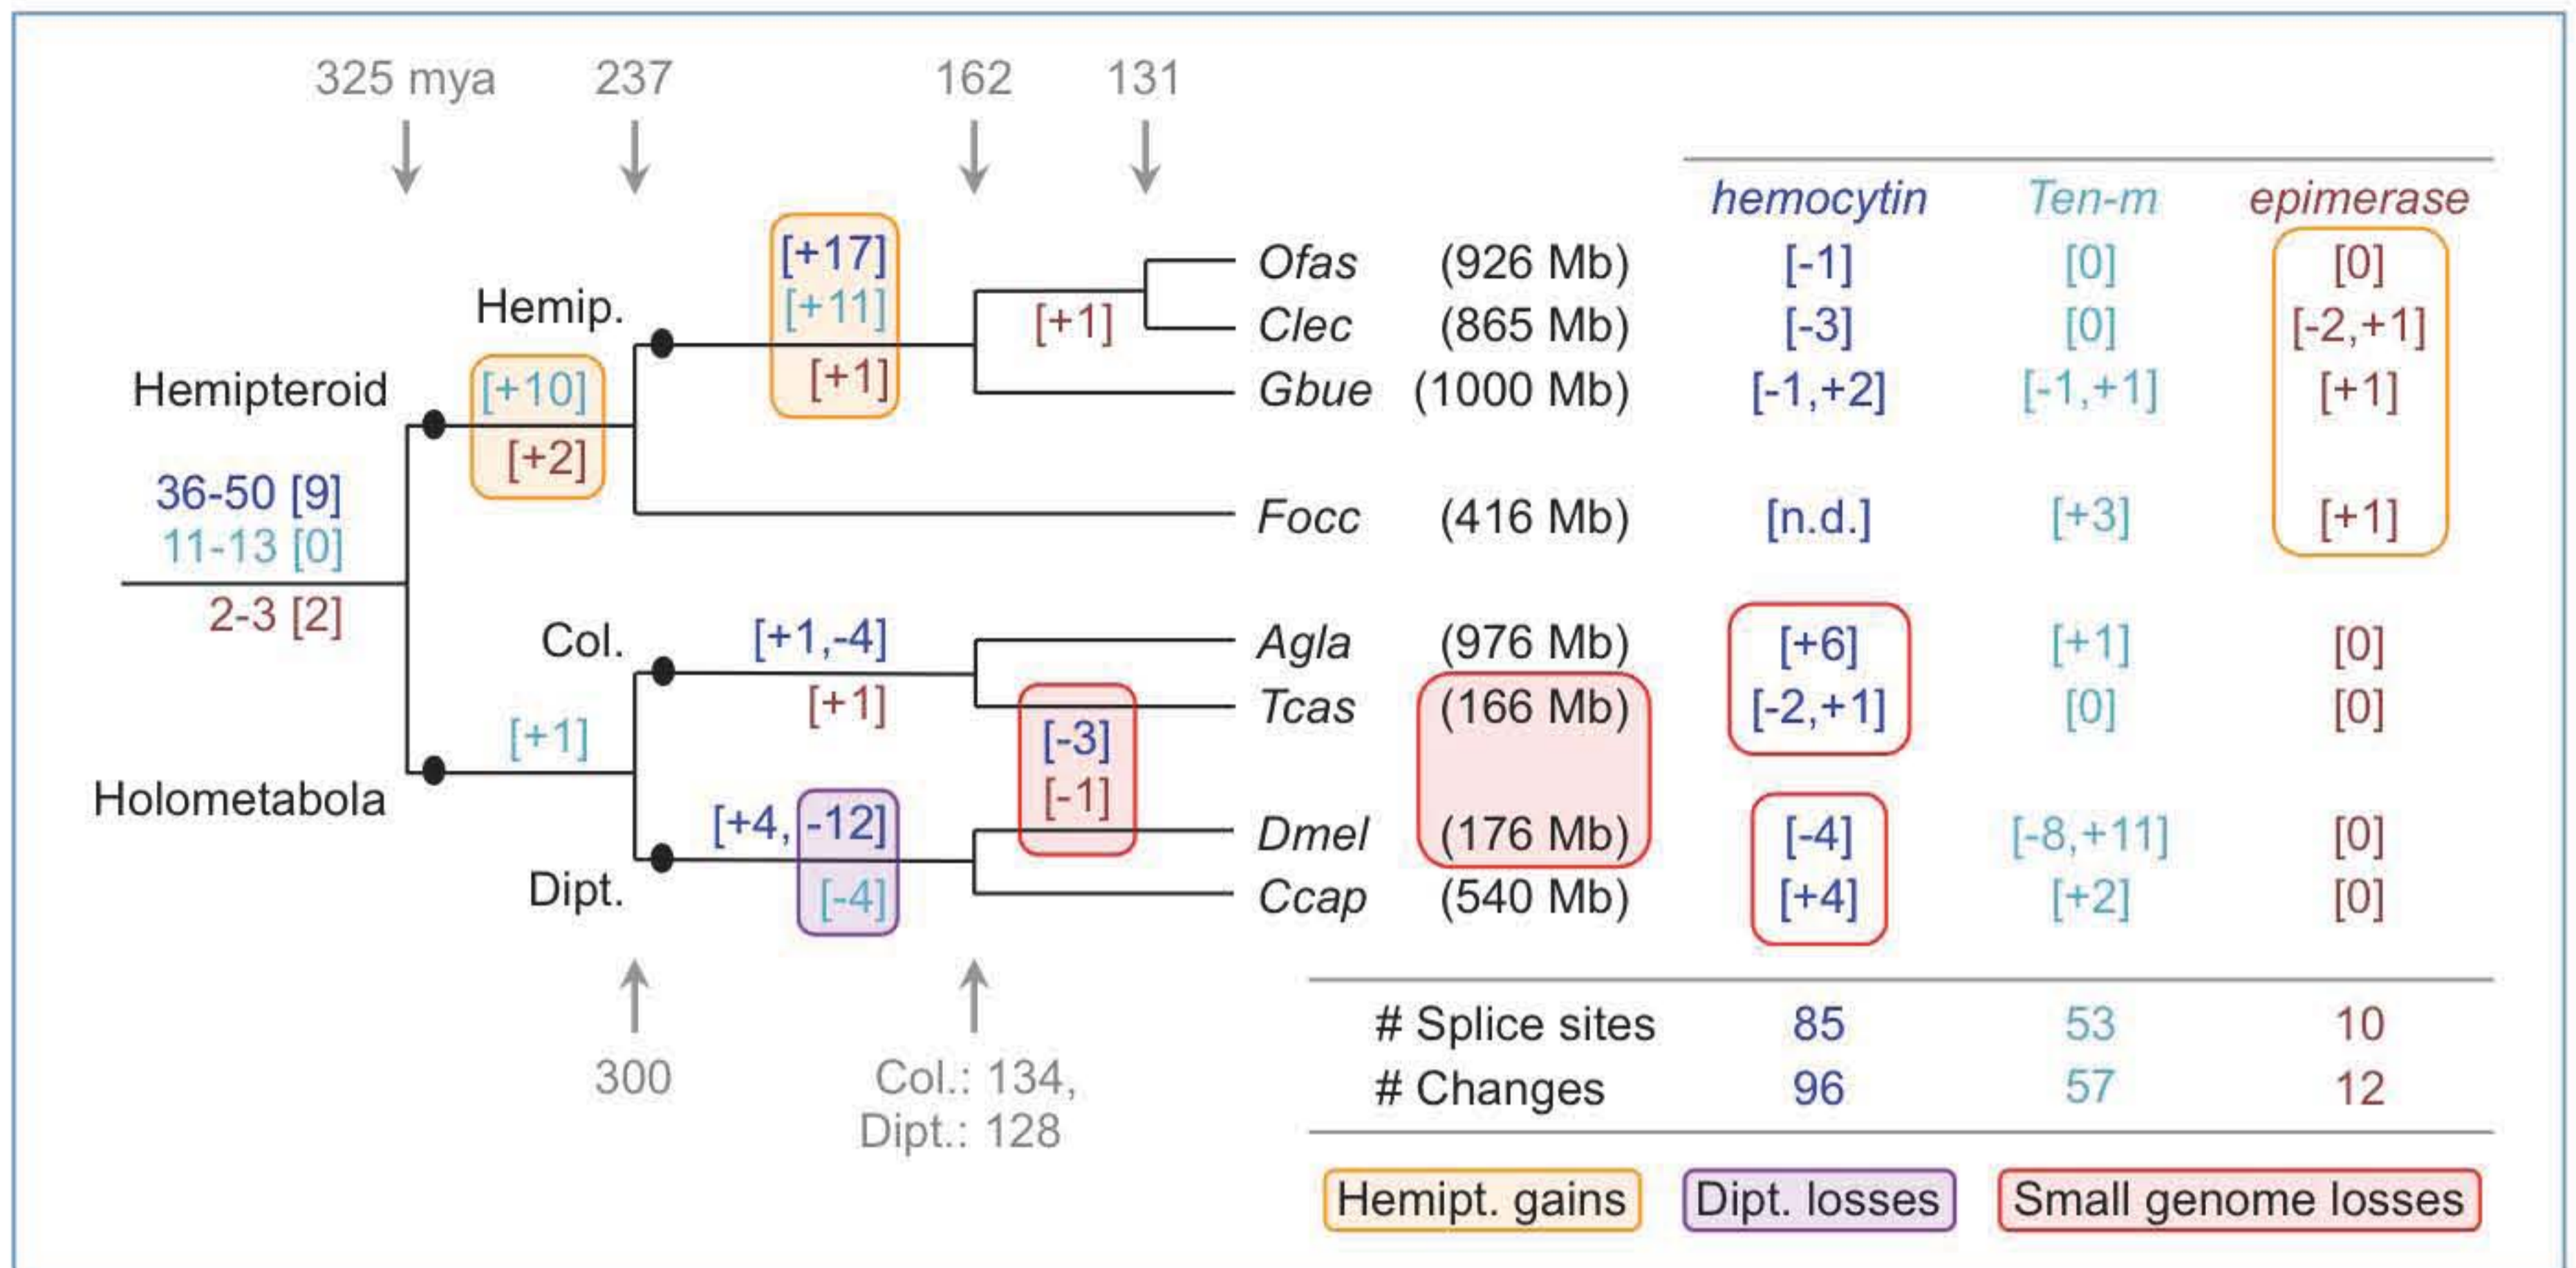

**Fig 7. Splice site evolution correlates with both lineage and, independently, genome size.**

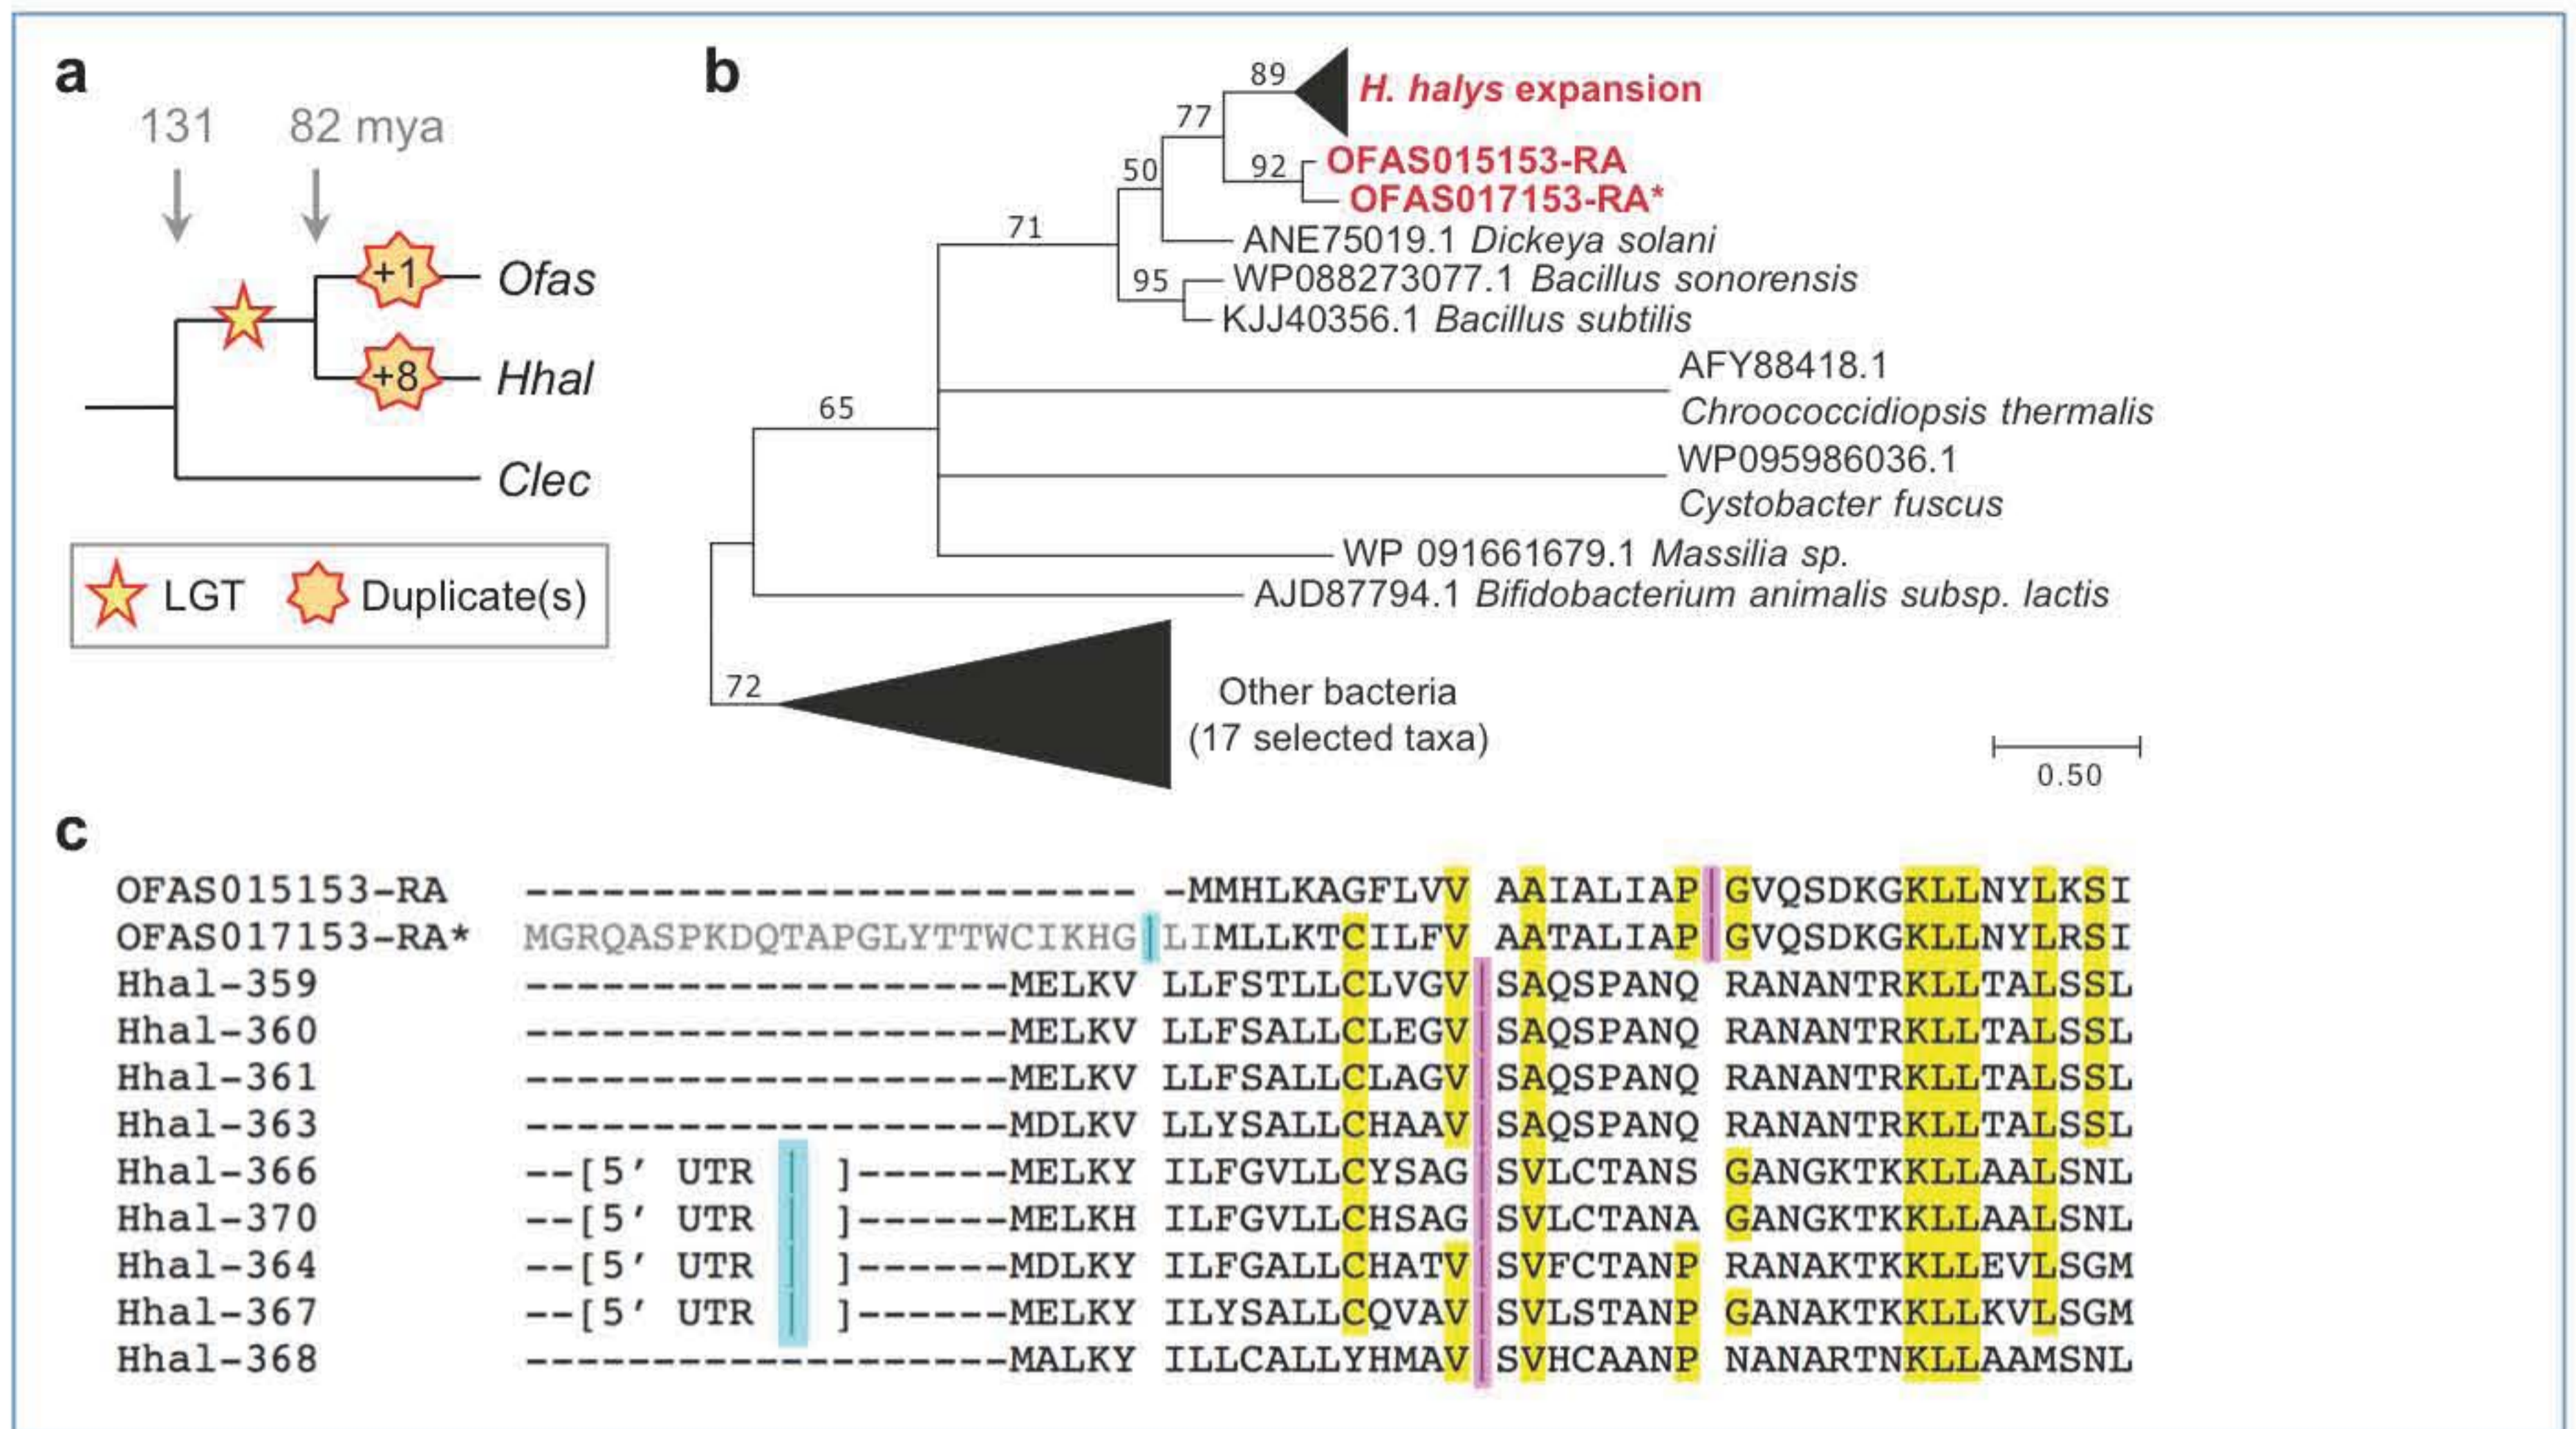

**Fig 8. Lateral gene transfer introduction and subsequent evolution within the Hemiptera for mannosidase-encoding genes.**

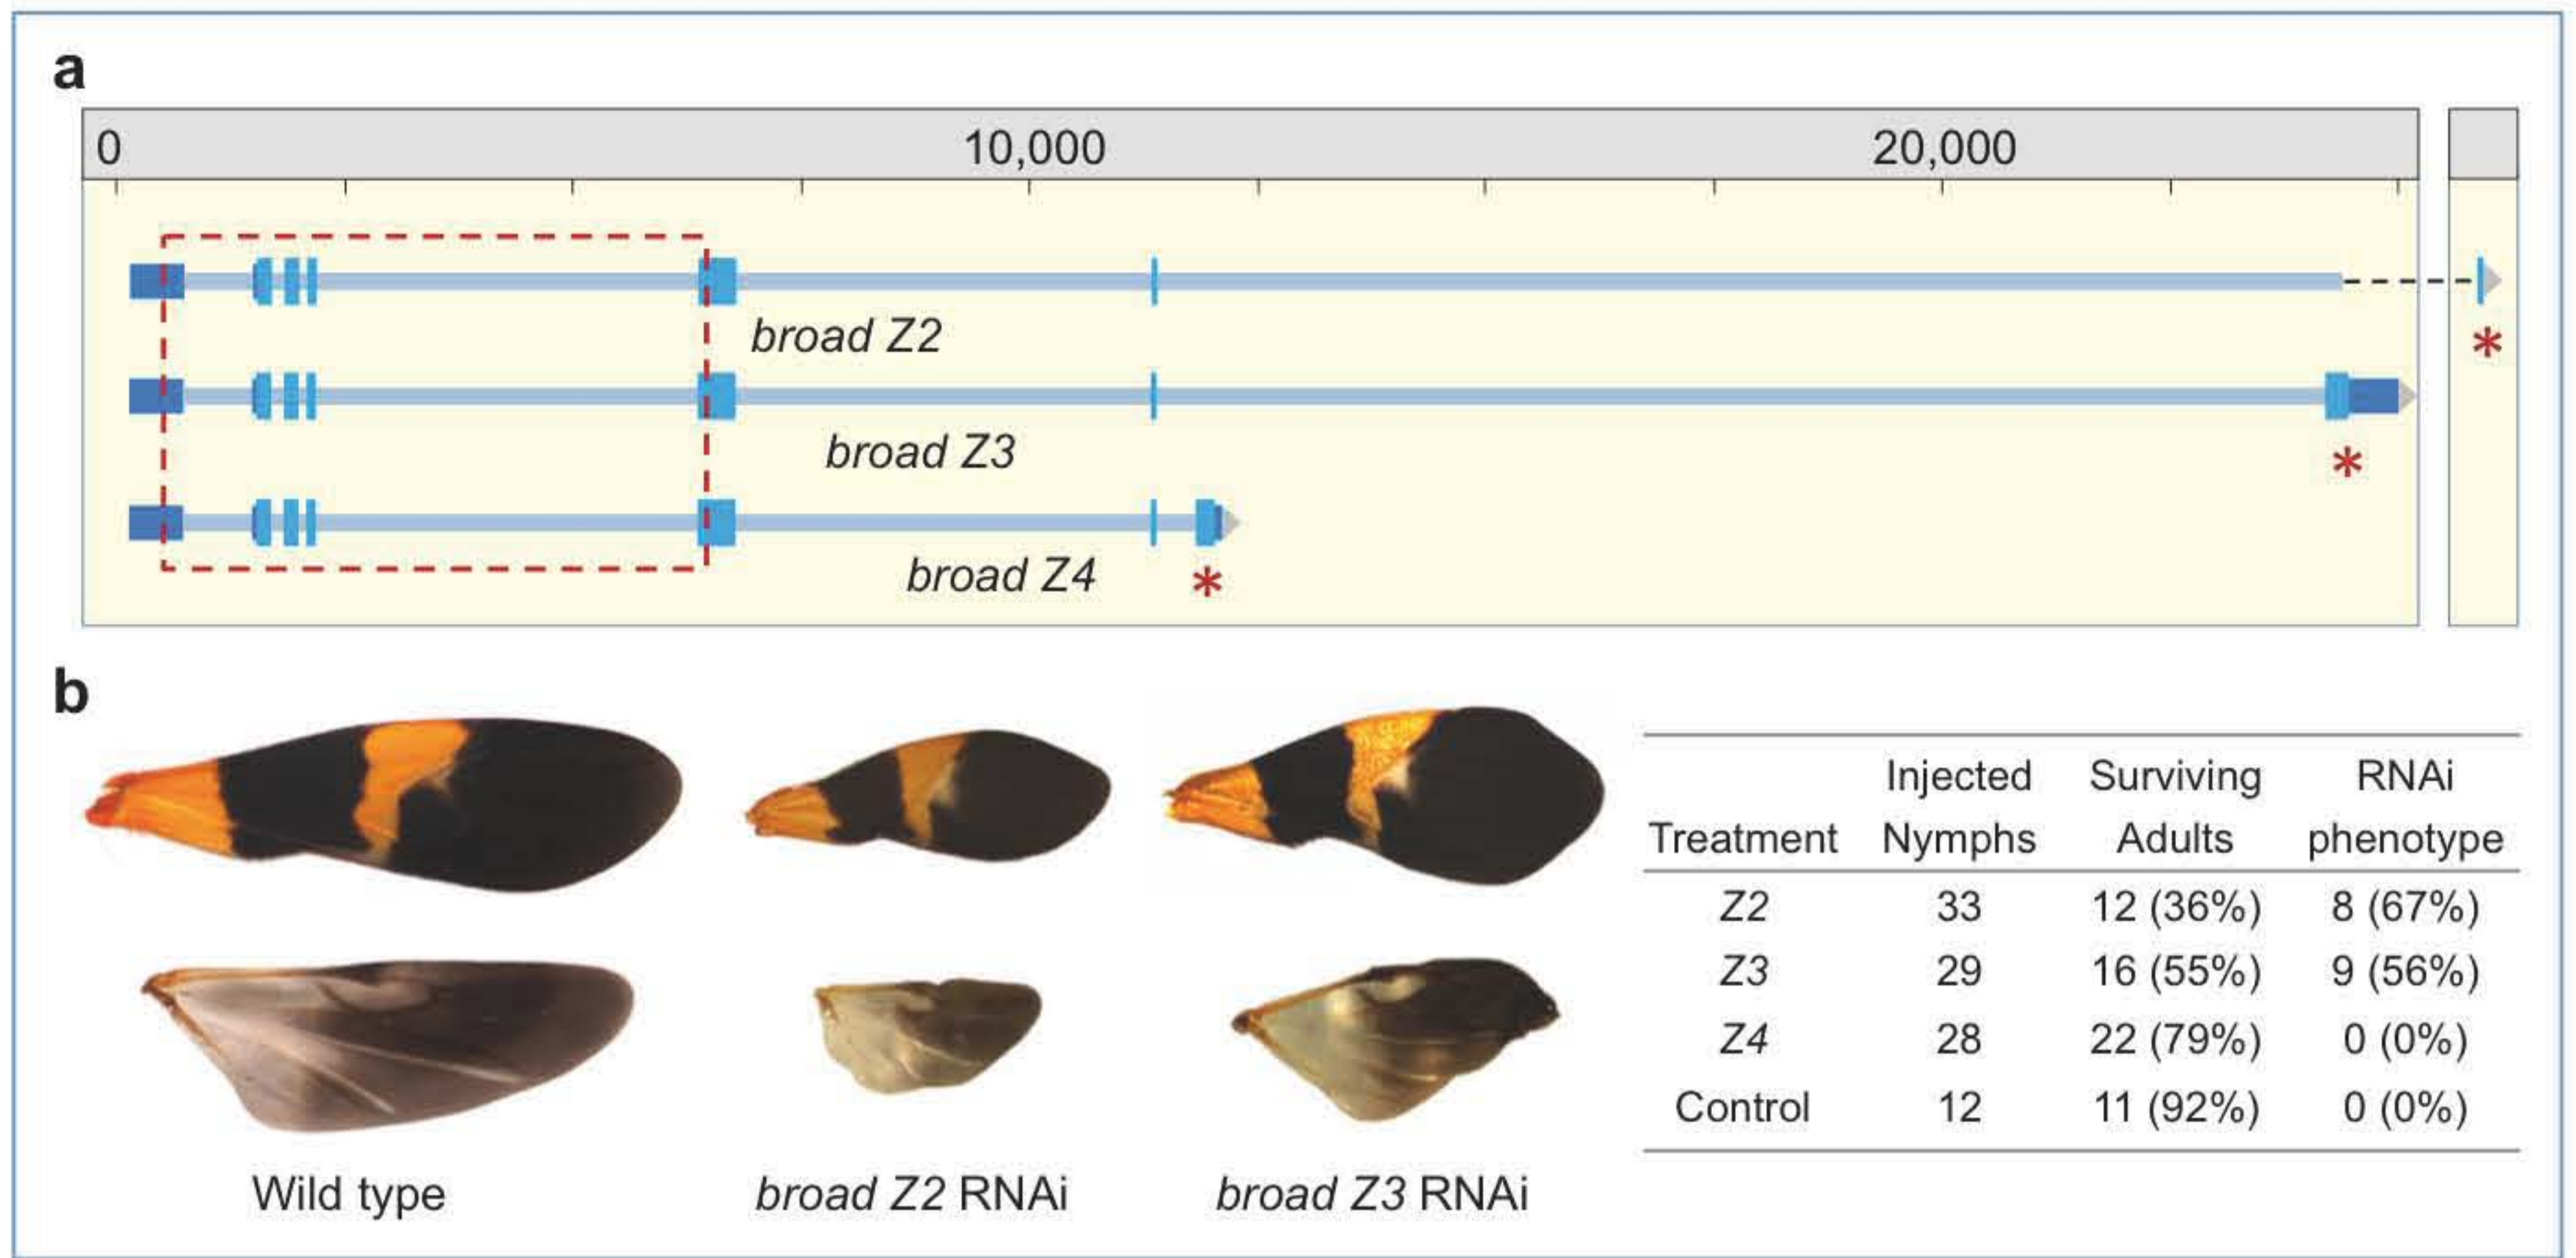

**Fig 9. Isoform-specific RNAi based on new genome annotations affects the molting and cuticle identity gene *broad*.**



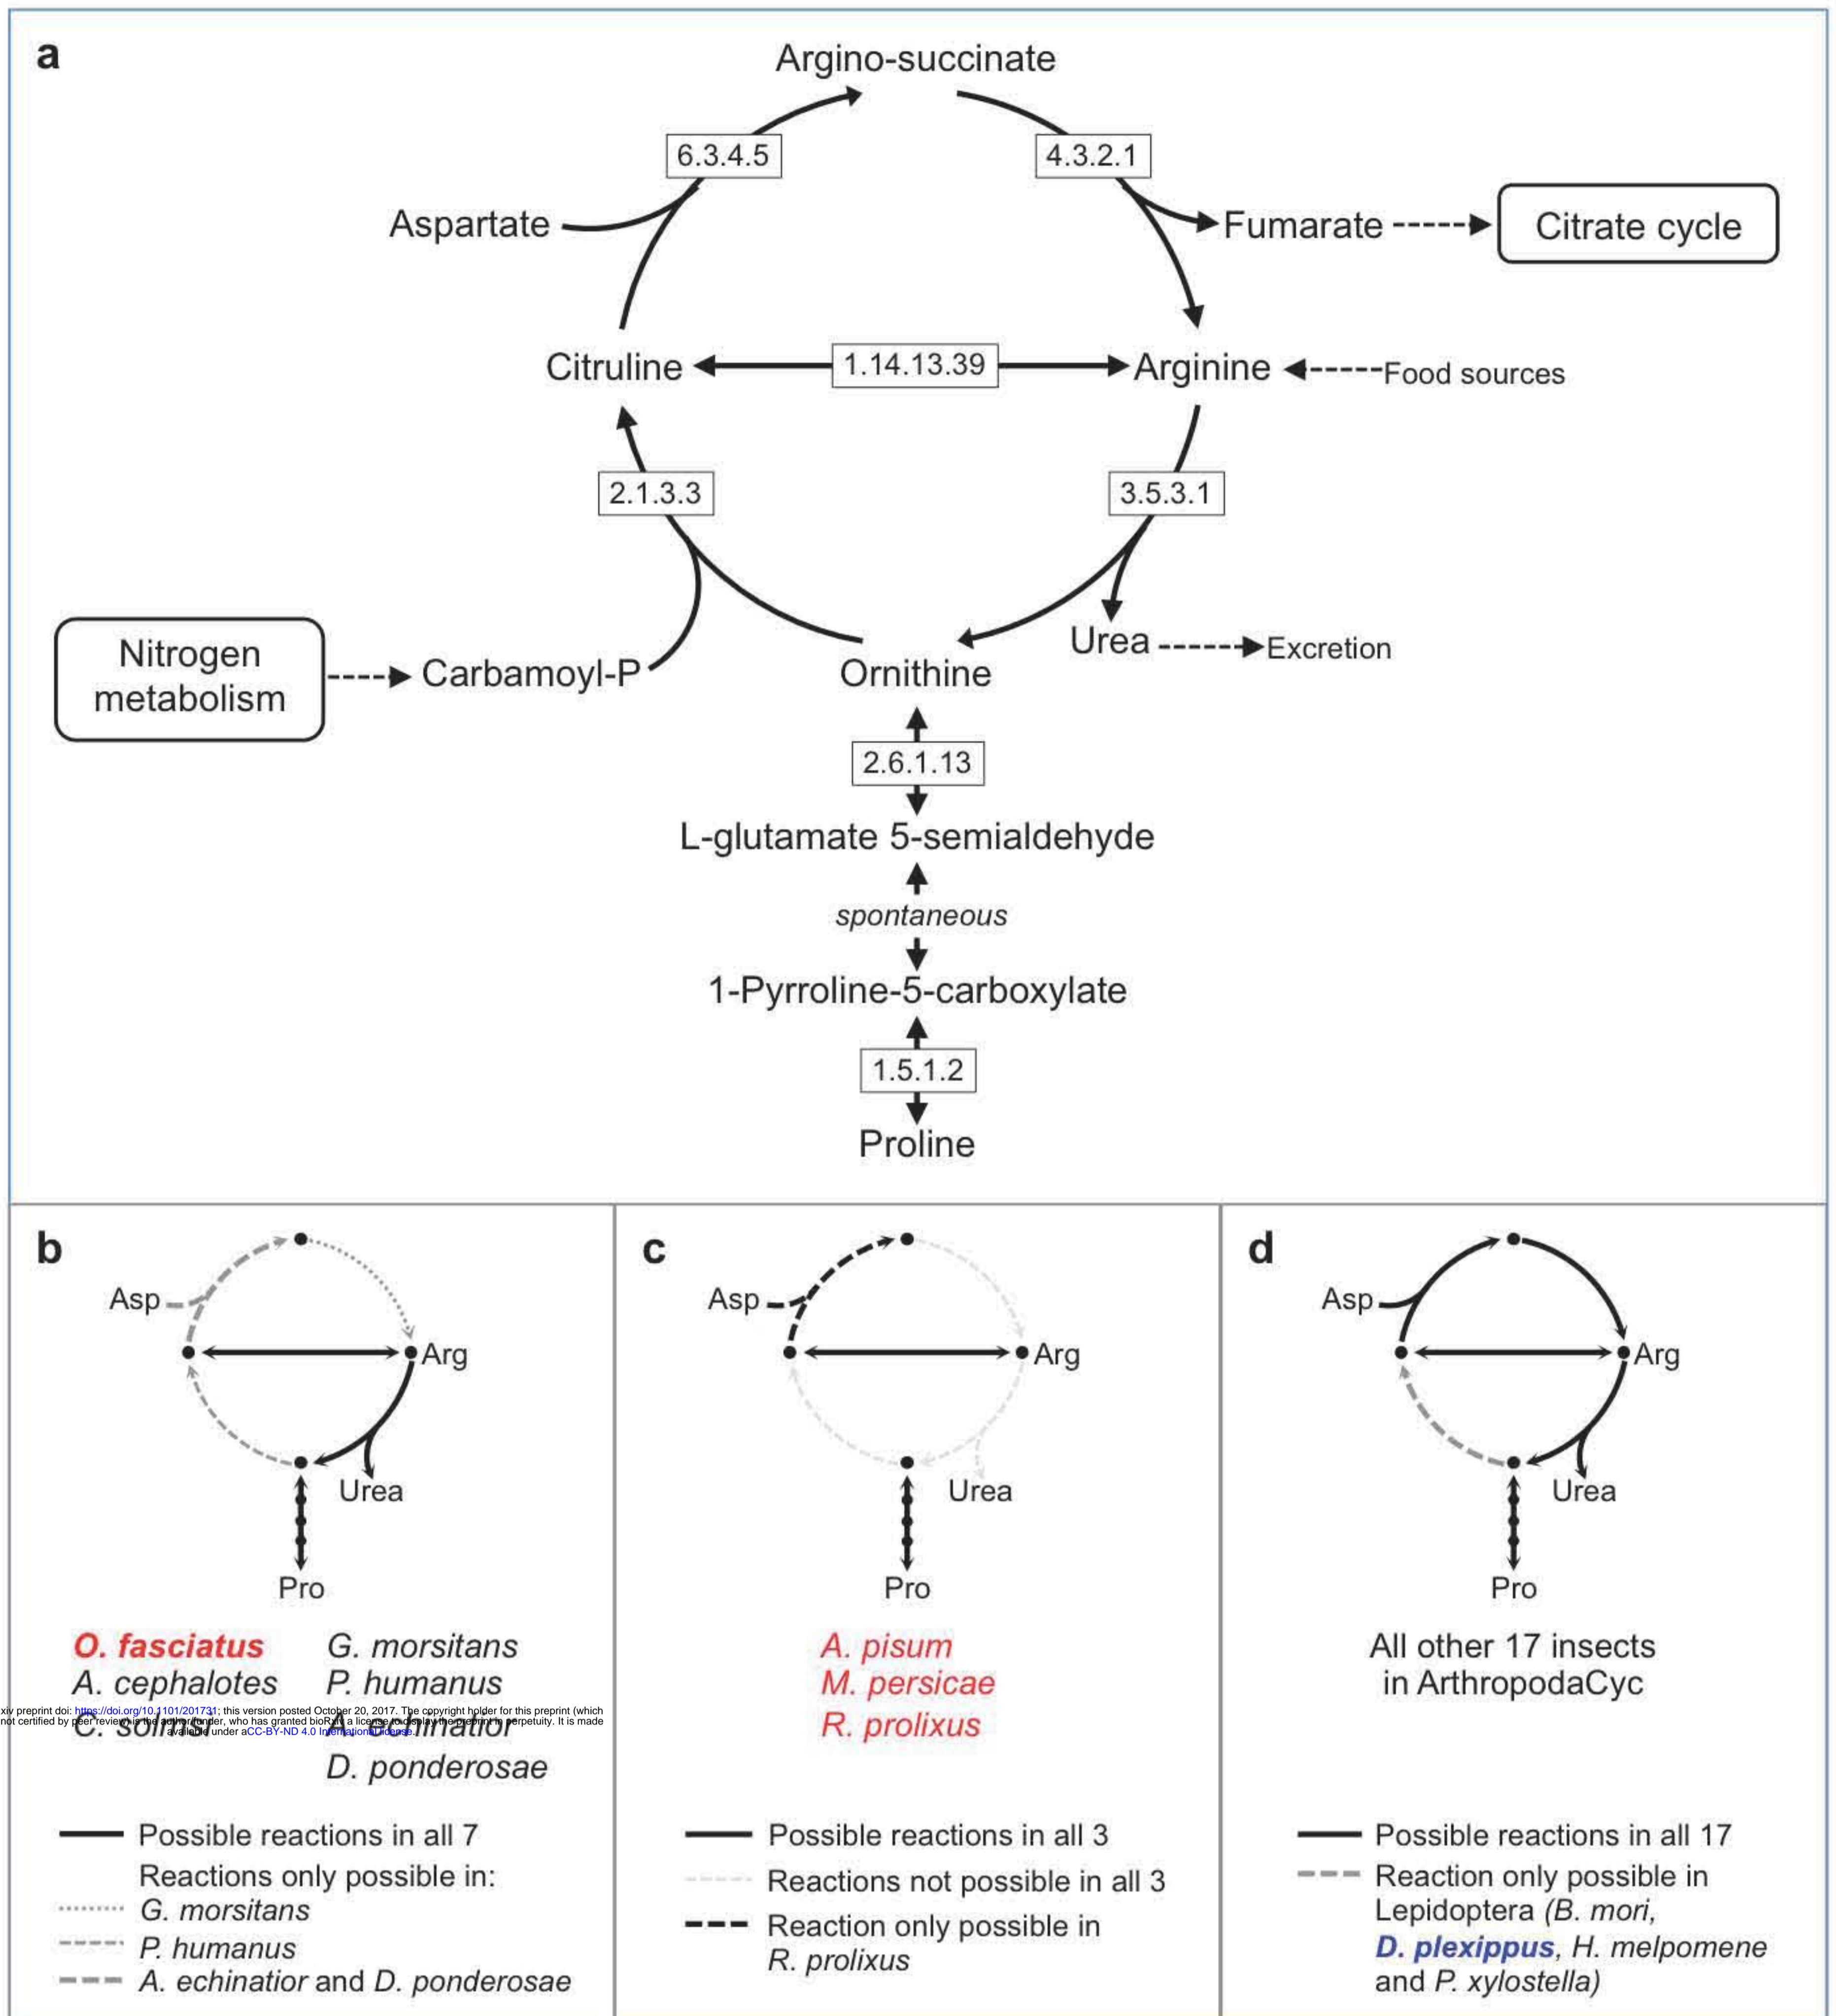

**Fig 10. Comparison of the urea cycle of *Oncopeltus* with 26 other insect species.**
